# Supplementary material for: New Diabetes Questionnaire to add patients’ perspectives to diabetes care for adults with type 1 and type 2 diabetes: nationwide cross-sectional study of construct validity assessing associations with generic health-related quality of life and clinical variables
Source: PubMed Central journal article supplement — BMJ Open. 2020 Nov 17;10(11):e038966. doi: 10.1136/bmjopen-2020-038966 (PMC7674110; doi:10.1136/bmjopen-2020-038966), 2020-11-17
Supplement: bmjopen-2020-038966.draft_revisions.pdf [file bmjopen-2020-038966.draft_revisions.pdf]

# BMJ Open

BMJ Open is committed to open peer review. As part of this commitment we make the peer review history of every article we publish publicly available.

When an article is published we post the peer reviewers' comments and the authors' responses online. We also post the versions of the paper that were used during peer review. These are the versions that the peer review comments apply to.

The versions of the paper that follow are the versions that were submitted during the peer review process. They are not the versions of record or the final published versions. They should not be cited or distributed as the published version of this manuscript.

BMJ Open is an open access journal and the full, final, typeset and author-corrected version of record of the manuscript is available on our site with no access controls, subscription charges or pay-per-view fees (<http://bmjopen.bmj.com>).

If you have any questions on BMJ Open's open peer review process please email [info.bmjopen@bmj.com](mailto:info.bmjopen@bmj.com)

# BMJ Open

**New diabetes questionnaire to add patients' perspectives to diabetes care for adults with type 1 and type 2 diabetes – Nationwide cross-sectional study of construct validity assessing associations with generic health-related quality of life and clinical variables**

|                               |                                                                                                                                                                                                                                                                                                                                                                                                                                                                                                                                                                                                                                                                                                                                                                                                                                                                                                                                                                                                                                                                                                                                                                                                                                      |
|-------------------------------|--------------------------------------------------------------------------------------------------------------------------------------------------------------------------------------------------------------------------------------------------------------------------------------------------------------------------------------------------------------------------------------------------------------------------------------------------------------------------------------------------------------------------------------------------------------------------------------------------------------------------------------------------------------------------------------------------------------------------------------------------------------------------------------------------------------------------------------------------------------------------------------------------------------------------------------------------------------------------------------------------------------------------------------------------------------------------------------------------------------------------------------------------------------------------------------------------------------------------------------|
| Journal:                      | <i>BMJ Open</i>                                                                                                                                                                                                                                                                                                                                                                                                                                                                                                                                                                                                                                                                                                                                                                                                                                                                                                                                                                                                                                                                                                                                                                                                                      |
| Manuscript ID                 | bmjopen-2020-038966                                                                                                                                                                                                                                                                                                                                                                                                                                                                                                                                                                                                                                                                                                                                                                                                                                                                                                                                                                                                                                                                                                                                                                                                                  |
| Article Type:                 | Original research                                                                                                                                                                                                                                                                                                                                                                                                                                                                                                                                                                                                                                                                                                                                                                                                                                                                                                                                                                                                                                                                                                                                                                                                                    |
| Date Submitted by the Author: | 31-Mar-2020                                                                                                                                                                                                                                                                                                                                                                                                                                                                                                                                                                                                                                                                                                                                                                                                                                                                                                                                                                                                                                                                                                                                                                                                                          |
| Complete List of Authors:     | Svedbo Engström, Maria; Dalarna University School of Education Health and Social Studies; University of Gothenburg Sahlgrenska Academy, Department of Molecular and Clinical Medicine, Institute of Medicine<br>Leksell, Janeth; Dalarna University, School of Education, Health and Social Studies; Uppsala University, Clinical Diabetology and Metabolism, Department of Medical Sciences<br>Johansson, Unn-Britt; Sophiahemmet University College; Karolinska Institutet, Department of Clinical Sciences and Education, Södersjukhuset<br>Borg, Sixten; Lund University, Department of Clinical Sciences in Malmö, Health Economics Unit, Medicon Village, Lund<br>Palaszewski, Bo; Västra Götalandsregionen, Department of Data Management and Analysis<br>Franzén, Stefan; Västra Götalandsregionen, Register Center Västra Götaland<br>Gudbjörnsdottir, Soffia; University of Gothenburg Sahlgrenska Academy, Department of Molecular and Clinical Medicine, Institute of Medicine; Västra Götalandsregionen, Register Center Västra Götaland<br>Eeg-Olofsson, Katarina; University of Gothenburg Sahlgrenska Academy, Department of Molecular and Clinical Medicine, Institute of Medicine; Sahlgrenska University Hospital |
| Keywords:                     | General diabetes < DIABETES & ENDOCRINOLOGY, Clinical audit < HEALTH SERVICES ADMINISTRATION & MANAGEMENT, Quality in health care < HEALTH SERVICES ADMINISTRATION & MANAGEMENT                                                                                                                                                                                                                                                                                                                                                                                                                                                                                                                                                                                                                                                                                                                                                                                                                                                                                                                                                                                                                                                      |
|                               |                                                                                                                                                                                                                                                                                                                                                                                                                                                                                                                                                                                                                                                                                                                                                                                                                                                                                                                                                                                                                                                                                                                                                                                                                                      |

SCHOLARONE™  
Manuscripts

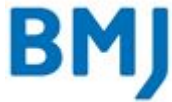

I, the Submitting Author has the right to grant and does grant on behalf of all authors of the Work (as defined in the below author licence), an exclusive licence and/or a non-exclusive licence for contributions from authors who are: i) UK Crown employees; ii) where BMJ has agreed a CC-BY licence shall apply, and/or iii) in accordance with the terms applicable for US Federal Government officers or employees acting as part of their official duties; on a worldwide, perpetual, irrevocable, royalty-free basis to BMJ Publishing Group Ltd ("BMJ") its licensees and where the relevant Journal is co-owned by BMJ to the co-owners of the Journal, to publish the Work in this journal and any other BMJ products and to exploit all rights, as set out in our [licence](#).

The Submitting Author accepts and understands that any supply made under these terms is made by BMJ to the Submitting Author unless you are acting as an employee on behalf of your employer or a postgraduate student of an affiliated institution which is paying any applicable article publishing charge ("APC") for Open Access articles. Where the Submitting Author wishes to make the Work available on an Open Access basis (and intends to pay the relevant APC), the terms of reuse of such Open Access shall be governed by a Creative Commons licence – details of these licences and which [Creative Commons](#) licence will apply to this Work are set out in our licence referred to above.

Other than as permitted in any relevant BMJ Author's Self Archiving Policies, I confirm this Work has not been accepted for publication elsewhere, is not being considered for publication elsewhere and does not duplicate material already published. I confirm all authors consent to publication of this Work and authorise the granting of this licence.

**Title:**

New diabetes questionnaire to add patients' perspectives to diabetes care for adults with type 1 and type 2 diabetes – Nationwide cross-sectional study of construct validity assessing associations with generic health-related quality of life and clinical variables

**Authors:**

Maria Svedbo Engström<sup>a,b</sup>; Janeth Leksell<sup>b,c</sup>; Unn-Britt Johansson<sup>d,e</sup>; Sixten Borg<sup>f</sup>,  
Bo Palaszewski<sup>g</sup>; Stefan Franzén<sup>h</sup>; Soffia Gudbjörnsdóttir<sup>a,h</sup>; Katarina Eeg-Olofsson<sup>a,i</sup>

**Author affiliations:**

<sup>a</sup> Department of Molecular and Clinical Medicine, Institute of Medicine, Sahlgrenska Academy, University of Gothenburg, Gothenburg, Sweden

<sup>b</sup> Dalarna University, School of Education, Health and Social Studies, Falun, Sweden

<sup>c</sup> Uppsala University, Clinical Diabetology and Metabolism, Department of Medical Sciences, Uppsala, Sweden

<sup>d</sup> Sophiahemmet University, Stockholm, Sweden

<sup>e</sup> Karolinska Institutet, Department of Clinical Sciences and Education, Södersjukhuset, Stockholm, Sweden

<sup>f</sup> Lund University, Department of Clinical Sciences in Malmö, Health Economics Unit, Medicon Village, Lund, Sweden

<sup>g</sup> Region Västra Götaland, Department of Data Management and Analysis, Gothenburg, Sweden

<sup>h</sup> Register Center Västra Götaland, Gothenburg, Sweden

<sup>i</sup> Sahlgrenska University Hospital, Gothenburg, Sweden

**Corresponding author:**

Maria Svedbo Engström

Postal address: Dalarna University, School of Education, Health and Social Studies, SE-79188 Falun, Sweden

E-mail: [msd@du.se](mailto:msd@du.se)

Telephone: +46(0)70 191 86 05

**ORCID iDs:**

Borg: 0000-0001-6292-7002; Eeg-Olofsson: 0000-0002-3376-4707; Johansson: 0000-0003-3309-136X; Leksell: 0000-0001-8682-2045; Palaszewski: 0000-0002-4854-2701; Svedbo Engström: 0000-0002-8267-592X

**Word Count:** 4387

**Abstract**

**Objectives:** To study evidence for construct validity, the aim was to describe the outcome from the recently developed Diabetes Questionnaire, assess the associations of that outcome with clinical variables and generic health-related quality of life, and study the sensitivity to differences between clinically relevant groups of glycaemic control in adults with type 1 and type 2 diabetes in a nationwide setting.

**Design:** Cross-sectional survey.

**Setting, participants, and outcome measures:** From the Swedish National Diabetes Register, 2,479 adults with type 1 diabetes and 2,469 adults with type 2 diabetes were selected at random among those 18-80 years of age with at least one registered test of glycated haemoglobin (HbA<sub>1c</sub>) during the last 12 months. The Diabetes Questionnaire and the generic 36-item Short Form version 2 (SF-36v2) health survey were completed by 1373 (55.4%) adults with type 1 diabetes and 1353 (54.8%) with type 2 diabetes.

**Results:** Related to the pre-specified assumptions, supporting evidence for construct validity for the Diabetes Questionnaire was found. The statistically significant correlations with the clinical variables were few and weak. In relation to the SF-36v2, the strongest correlations were seen in the Diabetes Questionnaire scales General Well-being and Mood and Energy. In those scales, machine learning analyses showed that about 40-45% of the variance was explained by the SF-36v2 results and clinical variables. In multiple regression analyses among three groups with differing levels of HbA<sub>1c</sub> adjusted for demographics, other risk factors, and diabetes complications, the high-risk group had statistically significant lower scores than the well-controlled group in most Diabetes Questionnaire scales.

**Conclusions:** This nation-wide study shows that the Diabetes Questionnaire captures some generic health-related quality-of-life dimensions, in addition to adding diabetes-specific information not covered by the SF-36v2 and clinical variables. The Diabetes Questionnaire is also sensitive to differences between clinically relevant groups of glycaemic control.

**Keywords:** Diabetes Mellitus, Type 1; Diabetes Mellitus, Type 2; Patient-reported outcome; Cross-Sectional Study; Construct validity

## Article Summary

### Strengths and limitations of this study

- The cross-sectional study used a large, heterogeneous nationwide sample of adults with type 1 diabetes and adults with type 2 diabetes selected at random.
- Respondents were representative of the 2015 population in the Swedish National Diabetes Register.
- The Diabetes Questionnaire scales scores were related to relevant clinical variables and a well-known and often recommended measure of generic health-related quality of life.
- The analyses were limited to the respondents and might reflect a group with greater motivation for participation.
- The questionnaires were only offered in Swedish.

**Main text:****INTRODUCTION**

Everyday life with diabetes as an adult is a complex challenge. Diabetes makes individuals responsible for self-management to avoid serious short-term and long-term complications, while balancing self-perceived health and well-being in the present as well as in the future.[1-6] To support skills for self-management is a central task of diabetes care, and the individual patient's prerequisites, wishes, and available evidence must be taken into account.[1, 4-6] An important step for the Swedish National Diabetes Register (NDR) has therefore been to broaden health-care provider perspectives and enable a systematic collection of adults' perspectives of living with diabetes and their experiences of whether they are offered adequate support from diabetes care.[7-10] The newly developed Diabetes Questionnaire is intended to support meetings with individuals and provide a means for quality improvement at the local, regional, and national levels.[7-9]

The Diabetes Questionnaire has a sound basis and was developed from interviews with adults with type 1 or type 2 diabetes that identified a broad range of aspects important to the target group, such as well-being, impact on daily life, capabilities to manage diabetes, and support from diabetes care.[9] In line with Sen's capability approach,[11, 12] the Diabetes Questionnaire focuses on the individual's opportunities, prerequisites, and possible barriers to live a good life with diabetes.[7-9] Supporting evidence for content validity, face validity, and ease of items understandability and answerability has been presented.[8, 9] In addition, supporting evidence for test-retest reliability and that the scales can be used for comparison between men and women, between different age groups, and, for most scales, between type 1 and type 2 diabetes have been provided.[7, 8] Furthermore, the scales can detect differences between clinically relevant subgroups, such as diabetes type, diabetes treatment, age group, and gender.[7] We have also begun to study the associations with clinical variables by showing low individual-level correlations with glycated haemoglobin (HbA<sub>1c</sub>), systolic blood pressure (SBP), and LDL cholesterol.[7]

This study reports on an extended analysis of the evidence for construct validity by studying pre-specified assumptions of relationships to other measures and differences between relevant groups.[13] For this work, we chose to focus on differences between subgroups of glycaemic control and the relations to clinical variables relevant for diabetes care and an often-recommended generic measure of health-related quality of life, the 36-item Short Form

(SF-36v2) health survey. To study evidence for construct validity, the aim was to describe the outcome from the Diabetes Questionnaire, to assess the associations of that outcome with clinical variables and generic health-related quality of life, and to study the sensitivity to differences between clinically relevant groups of glycaemic control in adults with type 1 and type 2 diabetes in a nationwide setting.

## METHODS

### Sample and data-collection

In this cross-sectional survey, 2,479 adults with type 1 diabetes and 2,469 with type 2 diabetes were selected at random without replacement from the Swedish NDR. Eligibility criteria were being alive, 18-80 years of age, and recorded in the NDR during the period from September 30<sup>th</sup> 2014 to October 1<sup>st</sup> 2015 with at least one recorded test of HbA<sub>1c</sub> level during the previous 12 months. With these criteria, 29,245 adults with type 1 diabetes at hospital out-patient clinics and 208,852 adults with type 2 diabetes at primary health care centres were eligible for recruitment. The sample size was estimated to enable subgroup analyses. No formal sample size-calculation was conducted as there was a lack of data on the variation in standard deviations for the Diabetes Questionnaire prior to this data-collection effort.

The Diabetes Questionnaire, the SF-36v2 survey, and a prepaid return envelope were sent by mail in October 2015 to survey selectees and again to non-respondents after 30 days.[7, 14] Both questionnaires were answered by 1,373 (55.4%) individuals with type 1 diabetes and 1,353 (54.8%) with type 2 diabetes[14]. With small differences in response rate depending on the questionnaires in question, the sample has been described as previously focusing on the scale development of the Diabetes Questionnaire[7] and separate analyses of the SF-36v2 data[14]. Age, sex, and clinical variables (diabetes type defined by clinical diagnosis, diabetes duration, HbA<sub>1c</sub> level, cardiovascular risk factors, complications, physical activity level, and receipt of medical treatment) recorded because of their relevance to high-quality diabetes care were collected from the NDR.

### Diabetes Questionnaire

The Diabetes Questionnaire is a 33-item self-reporting questionnaire having a total of 12 scales divided into 2 main parts.[7, 8] Part 1 has 22 items on 8 scales and acts as a patient-reported outcome measure (PROM). These scales are General Wellbeing (GenW), Mood and Energy (MoE), Free of Worries about blood sugar (FreW), Capabilities to Manage your



1  
2  
3 Diabetes (ManD), Diet and Exercise (DiEx), Not Limited by Diabetes (NLD), Not Limited by  
4 Blood Sugar (NLBS), and Support from Others (SuO). Part 2 is an 11-item patient-reported  
5 experience measure (PREM) with 4 scales. Those scales are Support from Diabetes Care  
6 (SuDC), Access to Diabetes Care (AcDC), Continuity in Diabetes Care (CoDC), and Medical  
7 Devices and Medical Treatment (MDMT). All scales are scored from 0 to 100, with higher  
8 scores representing the more desirable outcome. The scales ManD, NLBS, and MDMT are  
9 specific to diabetes type.[7]  
10  
11  
12  
13  
14  
15  
16

### 17 **SF-36v2 survey**

18 The SF-36v2 survey is a self-reporting questionnaire for generic health-related quality of life  
19 with support for its validity and reliability in overall populations, such as people with  
20 diabetes.[3, 15-19] We used the self-administered standard form in Swedish and software  
21 from QualityMetric Inc. The eight domains produced are physical functioning (PF); role-  
22 physical (RP), that is role limitations due to physical health problems; bodily pain (BP);  
23 general health (GH); vitality (VT); social functioning (SF); role-emotional (RE), that is role  
24 limitations due to mental health problems; and mental health (MH). The domains are scored  
25 from 0 to 100. Higher scores indicate a better general health-related quality of life.[15, 16]  
26  
27  
28  
29  
30  
31  
32  
33

### 34 **Pre-specified assumptions**

35 As the Diabetes Questionnaire is intended to measure patient perspectives on how they feel,  
36 how their diabetes treatment is going, and their experiences of support from diabetes care, the  
37 pre-specified assumptions for correlations with clinical variables and the SF-36v2 were as  
38 follows:  
39  
40  
41  
42

- 43 • A small number of negative and weak correlations would be found between the  
44 Diabetes Questionnaire scales and the clinical variables, mostly related to the HbA<sub>1c</sub>  
45 level. There would be no correlations with SBP and LDL cholesterol.  
46
- 47 • The Diabetes Questionnaire PROM scales GenW, MoE, FreW, ManD, DiEx, NLD,  
48 and NLBS would have more and stronger correlations to the SF-36v2 domains, as  
49 compared to the PROM scale SuO and the PREM scales (SuDC, AcDC, CoDC, and  
50 MDMT). Observed correlations would be positive, with the strongest in GenW and  
51 MoE. Across the other scales, strong correlations were not expected. Correlations  
52  $\geq 0.60$  were considered as very strong, 0.50 to  $<0.60$  as strong, 0.40 to  $<0.50$  as  
53 moderate, and  $<0.40$  as weak.  
54  
55  
56  
57  
58  
59  
60

## Statistical Analysis

The data for participants with type 1 and type 2 diabetes were analysed separately. The descriptive statistics for each variable are based on non-missing observations. The continuous variables are given as means and standard deviations for normal distributions and as medians and interquartile ranges for skewed distributions. The categorical variables are presented as numbers and percentages. The generation of scale scores from the Diabetes Questionnaire is described in detail elsewhere.[7] The SF-36v2 domain scores were generated using the manual and licensed software from QualityMetric.[16]

Spearman's rank correlation was used to study the associations between the Diabetes Questionnaire scale scores and the clinical variables age, diabetes duration, HbA<sub>1c</sub> level, body mass index (BMI), LDL cholesterol, and SBP, as well as between the scores from the Diabetes Questionnaire scales and the SF-36v2 domains. With machine learning using random forests, non-linear associations were investigated between the Diabetes Questionnaire scales and the SF-36v2 domains together with clinical variables (age, sex, diabetes duration, HbA<sub>1c</sub> level, BMI, LDL cholesterol, and SBP). First, the variance in all Diabetes Questionnaire scales was examined in relation to the SF-36v2 domains and the clinical variables together. Next, the variable importance of the SF-36v2 domains and the clinical variables as predictors of the PROM scales GenW and MoE were examined. We also examined the percent variance in HbA<sub>1c</sub> explained by another clinical variable, the Diabetes Questionnaire scales, and the SF-36v2 domains together. The results are given as percent of the total variance. Each model contained 1000 trees.

To study group-level associations between the Diabetes Questionnaire scales and glycaemic control as measured by HbA<sub>1c</sub>, unadjusted and adjusted multiple regression analyses were conducted in the same manner as previously described for the SF-36v2 data[14]. HbA<sub>1c</sub> was considered as a categorical variable divided into three clinically relevant groups corresponding to differing levels of glycaemic control and consequently differing levels of the risk of diabetes complications according to international and Swedish treatment guidelines. The three groups were well-controlled (<52 mmol/mol), sub-optimal (52-69 mmol/mol), and high-risk (≥70 mmol/mol). For the three HbA<sub>1c</sub> groups, the least square mean estimates and 95% confidence intervals were calculated for each scale. The scale observations were modelled with a linear model with fixed effects for the HbA<sub>1c</sub> group (exposure), age, sex, diabetes duration, BMI, SBP, LDL-cholesterol, micro- and macro-albuminuria, estimated

1  
2  
3 glomerular filtration rate, retinopathy, smoking status, physical activity level, previous  
4 coronary heart disease, previous stroke, and receipt of antihypertensive and lipid lowering  
5 treatments. The analyses were performed separately for each imputed data set, and the results  
6 were subsequently combined using Rubin's rules. The results are presented as least square  
7 mean estimates with 95% confidence intervals.  
8  
9

10  
11  
12  
13 The extent of missing data was 0% for age and sex, 7.2% for clinical variables (range  
14 0-36.5%), 1.7% for the SF-36v2 domains (range 0-3.3% for individual dimensions), and 4.8%  
15 for the Diabetes Questionnaire scales (range 0.3-34.7% for individual scales). For the  
16 Diabetes Questionnaire, the higher extent of missing data is likely related to having "not  
17 applicable" as a response alternative in some scales, which at this stage was treated as missing  
18 data. For scales without "not applicable" as a response alternative, the range for missing data  
19 was 0.3-2.8%. Missing data were imputed 10 times, using multiple chained equations.  
20  
21  
22  
23  
24  
25

26  
27 The standardized mean difference was used to examine the data balance between the HbA<sub>1c</sub>  
28 groups and the deviation from the means in the clinical and demographic data. A significance  
29 level of 5% was used throughout; no allowance was made for multiplicity of statistical tests.  
30 The analyses were conducted using SAS 9.4 and R 3.4.4.  
31  
32  
33  
34  
35

### 36 **Patient and public involvement statement**

37 The Diabetes Questionnaire was based on qualitative interviews with adults living with  
38 diabetes.[8, 9] Adults with diabetes and representatives from patient organizations  
39 participated in expert reviews during the development and initial testing.[8] Adults with  
40 diabetes were involved in the pre-testing phase by participating in cognitive interviews and  
41 being consulted to comment on questionnaire revisions.[8] The analyses presented here as the  
42 previous scale development and evaluation of reliability and validity relied on the  
43 contributions from those adults with diabetes who responded to the questionnaires.[7, 8] The  
44 Swedish Diabetes Foundation, the national patient organization, has expressed their support  
45 for the project.  
46  
47  
48  
49  
50  
51  
52  
53

### 54 **Ethical considerations**

55 The study conforms to the Declaration of Helsinki and was approved by the Regional Ethical  
56 Review Board in Gothenburg, Sweden (No. 029-15, T600-15). Participants gave their  
57 informed consent. The letter to the participants contained information about the study's  
58  
59  
60

1  
2  
3 purpose, the voluntary nature of their participation, and their right to end participation. The  
4 letter also disclosed information about the NDR, methods of handling personal data,  
5 confidentiality measures, and contact details.  
6  
7  
8  
9

## 10 RESULTS

11 Among respondents with type 1 diabetes, 50.3% were men. The averages of key statistics  
12 were 48.6 years for age, 24.7 years for diabetes duration, and 62 mmol/mol for HbA<sub>1c</sub> level.  
13 Among respondents with type 2 diabetes, 60.8% were men. Corresponding averages were  
14 66.6 years for age, 9.4 years for diabetes duration, and 53 mmol/mol for HbA<sub>1c</sub> level  
15 (Table 1). The crude means and standard deviations for the Diabetes Questionnaire scales are  
16 given in Table S1. The clinical characteristics of non-respondents are given in Table S2.  
17  
18  
19  
20  
21  
22  
23

### 24 **Linear correlations between the Diabetes Questionnaire scale scores and the clinical** 25 **variables**

26 In line with the assumptions, there were few statistically significant linear correlations  
27 between the Diabetes Questionnaire scales and the clinical variables. Observed correlations  
28 were weak, and most were negative. The results are shown as heat maps in Figs. S1-S2 with  
29 details provided in Tables S3-S4.  
30  
31  
32  
33  
34  
35

36 As assumed, the HbA<sub>1c</sub> level was the variable with most statistically significant correlations  
37 across the Diabetes Questionnaire scales. Statistically significant but weak correlations  
38 between having a lower and better HbA<sub>1c</sub> level and higher and better scores were seen in  
39 several Diabetes Questionnaire scales. For participants with type 1 diabetes, significant weak  
40 negative correlations (-0.12 to -0.25) were seen in the five Diabetes Questionnaire PROM  
41 scales GenW, FreW, ManD, DiEx, and NLBS. The strongest correlations were seen in ManD  
42 and DiEx. Among participants with type 2 diabetes, statistically significant but weak negative  
43 correlations (-0.13 to -0.24) were seen in the seven Diabetes Questionnaire PROM scales  
44 GenW, MoE, FreW, ManD, DiEx, NLD, and NLBS and in the two PREM scales SuDC and  
45 AcDC. The strongest correlations were seen in MoE, FreW, and ManD, with generally  
46 stronger correlations in the PROM scales than in the PREM scales (Figs. S1-S2,  
47 Tables S3-S4).  
48  
49  
50  
51  
52  
53  
54  
55  
56  
57  
58  
59  
60

**Table 1.** Clinical and demographic characteristics of the respondents separated by diabetes type and glycated haemoglobin (HbA<sub>1c</sub>) level

| Variable                              | Type 1 diabetes  |                                |                                  |                                |                                   | Type 2 diabetes |                                |                                  |                                |                                   |
|---------------------------------------|------------------|--------------------------------|----------------------------------|--------------------------------|-----------------------------------|-----------------|--------------------------------|----------------------------------|--------------------------------|-----------------------------------|
|                                       | All              | HbA <sub>1c</sub> <52 mmol/mol | HbA <sub>1c</sub> 52-69 mmol/mol | HbA <sub>1c</sub> ≥70 mmol/mol | Standardized mean difference, SMD | All             | HbA <sub>1c</sub> <52 mmol/mol | HbA <sub>1c</sub> 52-69 mmol/mol | HbA <sub>1c</sub> ≥70 mmol/mol | Standardized mean difference, SMD |
| Number (%)                            | 1373             | 284 (20.7%)                    | 781 (56.9%)                      | 308 (22.4%)                    |                                   | 1353            | 725 (53.6%)                    | 503 (37.2%)                      | 125 (9.2%)                     |                                   |
| Men, n (%)                            | 690 (50.3)       | 152 (53.5)                     | 391 (50.1)                       | 147 (47.7)                     | 0.077                             | 822 (60.8)      | 444 (61.2)                     | 302 (60.0)                       | 76 (60.8)                      | 0.016                             |
| Age, years (SD)                       | 48.6 (16.4)      | 46.9 (17.0)                    | 49.6 (16.1)                      | 47.8 (16.3)                    | 0.113                             | 66.6 (9.1)      | 66.5 (9.1)                     | 66.9 (9.0)                       | 65.5 (9.7)                     | 0.103                             |
| Diabetes duration, years (IQR)        | 22.0 (12.0-36.0) | 19.0 (7.0-32.0)                | 23.0 (13.0-37.0)                 | 24.0 (13.0-37.0)               | 0.150                             | 8.0 (4.0-14.0)  | 6.0 (3.0-11.0)                 | 10.0 (6.0-16.0)                  | 13.0 (6.0-17.0)                | 0.443                             |
| HbA <sub>1c</sub> mmol/mol (SD)       | 62 (12.7)        |                                |                                  |                                |                                   | 53 (12.5)       |                                |                                  |                                |                                   |
| BMI, kg/m <sup>2</sup> (SD)           | 26.0 (4.2)       | 25.2 (3.8)                     | 26.0 (4.2)                       | 26.7 (4.6)                     | 0.239                             | 29.9 (5.3)      | 29.3 (5.2)                     | 30.3 (5.4)                       | 32.0 (5.5)                     | 0.332                             |
| Systolic blood pressure, mmHg (SD)    | 127.0 (14.0)     | 124.8 (14.0)                   | 127.5 (13.8)                     | 127.8 (14.2)                   | 0.145                             | 134.3 (14.3)    | 134.0 (14.4)                   | 134.5 (13.7)                     | 135.1 (16.5)                   | 0.046                             |
| Antihypertensive medication, n (%)    | 589 (44.7)       | 99 (36.9)                      | 341 (45.3)                       | 149 (50.2)                     | 0.179                             | 1070 (80.1)     | 572 (79.6)                     | 404 (81.9)                       | 94 (76.4)                      | 0.091                             |
| LDL-cholesterol, mmol/L (SD)          | 2.4 (0.8)        | 2.5 (0.8)                      | 2.4 (0.8)                        | 2.5 (0.8)                      | 0.077                             | 2.5 (0.9)       | 2.5 (0.9)                      | 2.4 (0.9)                        | 2.5 (1.0)                      | 0.026                             |
| Lipid-lowering medication, n (%)      | 642 (48.4)       | 94 (34.6)                      | 378 (49.8)                       | 170 (57.6)                     | 0.315                             | 900 (68.1)      | 472 (66.6)                     | 344 (70.1)                       | 84 (69.4)                      | 0.050                             |
| Micro-albuminuria, n (%)              | 132 (10.3)       | 12 (4.6)                       | 70 (9.5)                         | 50 (17.6)                      | 0.285                             | 194 (18.0)      | 80 (13.9)                      | 83 (20.1)                        | 31 (34.1)                      | 0.323                             |
| Macro-albuminuria, n (%)              | 31 (2.6)         | 5 (2.1)                        | 12 (1.8)                         | 14 (5.2)                       | 0.126                             | 52 (5.0)        | 27 (4.8)                       | 20 (5.1)                         | 5 (6.1)                        | 0.037                             |
| Estimated Glomerular Filtration Rate, | 90.0 (23.5)      | 90.6 (20.7)                    | 89.1 (22.6)                      | 91.6 (27.7)                    | 0.071                             | 82.3 (23.5)     | 82.5 (22.3)                    | 81.9 (24.0)                      | 83.4 (27.9)                    | 0.038                             |

| Variable                              | Type 1 diabetes |                                |                                  |                                |                                   | Type 2 diabetes |                                |                                  |                                |                                   |
|---------------------------------------|-----------------|--------------------------------|----------------------------------|--------------------------------|-----------------------------------|-----------------|--------------------------------|----------------------------------|--------------------------------|-----------------------------------|
|                                       | All             | HbA <sub>1c</sub> <52 mmol/mol | HbA <sub>1c</sub> 52-69 mmol/mol | HbA <sub>1c</sub> ≥70 mmol/mol | Standardized mean difference, SMD | All             | HbA <sub>1c</sub> <52 mmol/mol | HbA <sub>1c</sub> 52-69 mmol/mol | HbA <sub>1c</sub> ≥70 mmol/mol | Standardized mean difference, SMD |
| eGFR, mL/min (SD)                     |                 |                                |                                  |                                |                                   |                 |                                |                                  |                                |                                   |
| Retinopathy, n (%)                    | 875 (65.9)      | 137 (50.6)                     | 520 (68.2)                       | 218 (74.1)                     | 0.333                             | 327 (29.4)      | 128 (21.7)                     | 153 (36.3)                       | 46 (47.0)                      | 0.366                             |
| Coronary heart disease, n (%)         | 83 (6.3)        | 9 (3.3)                        | 53 (7.0)                         | 21 (7.1)                       | 0.113                             | 279 (22.4)      | 136 (20.2)                     | 111 (24.0)                       | 32 (28.6)                      | 0.130                             |
| Stroke, n (%)                         | 48 (3.6)        | 5 (1.9)                        | 32 (4.2)                         | 11 (3.7)                       | 0.093                             | 96 (7.8)        | 48 (7.2)                       | 40 (8.9)                         | 8 (7.1)                        | 0.043                             |
| Smoker, n (%)                         | 135 (10.1)      | 14 (5.1)                       | 78 (10.2)                        | 43 (14.4)                      | 0.214                             | 162 (12.9)      | 79 (11.7)                      | 58 (12.3)                        | 25 (23.1)                      | 0.203                             |
| Physical activity, daily, n (%)       | 359 (27.6)      | 90 (33.5)                      | 203 (27.2)                       | 66 (23.2)                      | 0.334                             | 426 (34.9)      | 251 (38.7)                     | 157 (33.9)                       | 18 (16.7)                      | 0.410                             |
| <b>Diabetes treatment</b>             |                 |                                |                                  |                                | 0.136                             |                 |                                |                                  |                                | 0.813                             |
| Diet alone, n (%)                     |                 |                                |                                  |                                |                                   | 195 (14.4)      | 172 (23.7)                     | 19 (3.8)                         | 4 (3.3)                        |                                   |
| Oral hypoglycaemic agent alone, n (%) |                 |                                |                                  |                                |                                   | 718 (53.1)      | 419 (57.8)                     | 261 (52.0)                       | 38 (30.9)                      |                                   |
| Insulin alone, n (%)                  | 1335 (97.2)     | 271 (95.4)                     | 764 (97.8)                       | 300 (97.4)                     |                                   | 130 (9.6)       | 46 (6.3)                       | 63 (12.5)                        | 21 (17.1)                      |                                   |
| Insulin and oral agent, n (%)         | 32 (2.3)        | 9 (3.2)                        | 15 (1.9)                         | 8 (2.6)                        |                                   | 266 (19.7)      | 76 (10.5)                      | 140 (27.9)                       | 50 (40.7)                      |                                   |
| Insulin pump users, n (%)             | 356 (26.2)      | 66 (23.8)                      | 221 (28.5)                       | 69 (22.5)                      | 0.091                             | 2 (0.5)         | 1 (0.9)                        | 1 (0.5)                          | 0 (0.0)                        | 0.093                             |

The descriptive statistics are presented as the means and standard deviations (SD) for normally distributed continuous variables, the median and interquartile range (IQR) for skewed distributions, or number and percentages for categorical variables.

1  
2  
3 For age, statistically significant positive correlations showed that a higher age was weakly  
4 associated with higher and better scores in several Diabetes Questionnaire scales. For  
5 participants with type 1 diabetes, statistically significant weak positive correlations (0.11 to  
6 0.19) were seen in the four PROM scales MoE, FreW, ManD, and DiEx, and in the two  
7 PREM scales AcDC and MDMT. The highest correlations were seen in MoE, FreW, and  
8 MDMT. Among participants with type 2 diabetes, statistically significant weak positive  
9 correlations (0.12 to 0.16) were seen in the six PROM scales GenW, MoE, FreW, ManD, and  
10 DiEx. The highest correlations were seen in MoE, FreW, and DiEx. For LDL cholesterol and  
11 SBP, the results came up to the expectations of no statistically significant correlations.  
12 However, for participants with type 1 diabetes, a statistically significant negative correlation  
13 showed that a lower SBP was weakly associated with better scores in MoE. A lower BMI  
14 showed statistically significant weak negative correlations with higher scores in DiEx in both  
15 diabetes types as with GenW and MoE in type 2 diabetes. For diabetes duration, statistically  
16 significant positive correlations showed that a longer duration was weakly associated with  
17 higher scores in FreW and ManD for participants with type 1 diabetes. For those with type 2  
18 diabetes, statistically significant negative correlations showed that a longer duration was  
19 associated with lower scores in FreW and NLBS (Figs. S1-S2, Tables S3-S4).

### 34 **Linear correlations between scores in the Diabetes Questionnaire scales and the SF-36v2** 35 **domains**

36  
37 In line with the assumptions, the statistically significant linear correlations between the  
38 Diabetes Questionnaire scales and the SF-36v2 domains were stronger in seven of the PROM  
39 scales as compared to the PROM scale SuO and the PREM scales. As expected, the observed  
40 statistically significant correlations were all positive, showing an association between higher  
41 scores in both questionnaires. The results are shown in Figs. 1-2 and Tables S5-S6.

42  
43  
44  
45  
46  
47  
48 As assumed, the strongest correlations were seen in the Diabetes Questionnaire PROM scales  
49 GenW and MoE. Statistically significant positive correlations showed that higher scores in  
50 GenW and MoE were strongly associated with higher scores in about half of the SF-36v2  
51 domains. In GenW, statistically significant positive correlations were seen with the SF-36v2  
52 domains PF, GH, VT, and MH. The correlations were very strong with VT (0.60), strong with  
53 GH and MH (0.51 to 0.56), and weak with PF. Among those with type 2 diabetes, there were  
54 also statistically significant strong positive correlations between GenW and SF (0.51). In  
55 MoE, statistically significant positive correlations were seen with the SF-36v2 domains GH,  
56  
57  
58  
59  
60



1  
2  
3 VT, SF, and MH. The correlations were very strong with MH (0.60) and strong with GH, VT,  
4 and SF (0.51 to 0.58). Among those with type 2 diabetes, statistically significant strong  
5 positive correlations were also seen between MoE and RF (0.51). For both diabetes types,  
6 statistically significant strong positive correlations were also seen between the PROM scale  
7 DiEx and the VT domain (0.51). Statistically significant moderate positive correlations were  
8 also seen between the PROM scales and SF-36v2 domains. In NLD and NLBS, statistically  
9 significant moderate positive correlations were more common in type 2 diabetes than in  
10 type 1 diabetes. In the PROM scale SuO and the PREM scales, statistically significant  
11 correlations were weak (0.11 to 0.32) or absent (Figs. 1-2, Tables S5-S6).  
12  
13  
14  
15  
16  
17  
18  
19

### 20 **Non-linear associations**

21  
22 The results from the machine learning analysis are shown in Figs. 3 and S3. Similar results  
23 were seen for type 1 and type 2 diabetes. Among the PROM scales, the variance was  
24 explained by the SF-36v2 domains and the clinical variables to almost 40% in GenW and to  
25 around 45% in MoE. In FreW, ManD, DiEx, NLD, and NLBS, the variance was explained to  
26 about 25-30% and in SuO to about 10%. Among the PREM scales, SuDC, AcDC, and  
27 MDMT were explained to about 10% or below. In CoDC, almost no variance was explained  
28 (Fig. 3). As predictors of the Diabetes Questionnaire PROM scales GenW and MoE, the  
29 variables with the highest importance were the SF-36v2 domains GH, VT, and MH. LDL  
30 cholesterol and SBP had low variable importance (Fig. S3). The percent variance in HbA<sub>1c</sub>  
31 explained by other clinical variables, the SF-36v2 domains, and the Diabetes Questionnaire  
32 scales together was low, around 5% in type 1 diabetes and around 10% in type 2 diabetes.  
33 Consequently, the importance of the other clinical variables, the SF-36v2 domains, and the  
34 Diabetes Questionnaire scales as predictors of HbA<sub>1c</sub> was not examined.  
35  
36  
37  
38  
39  
40  
41  
42  
43  
44  
45

### 46 **Regression analyses of the Diabetes Questionnaire scales by HbA<sub>1c</sub> level**

47  
48 The results from the adjusted regression analyses of the Diabetes Questionnaire scales and the  
49 HbA<sub>1c</sub> groups are presented separately for participants with type 1 and type 2 diabetes in  
50 Fig. 4. The least square mean estimates and confidence intervals from the unadjusted and  
51 adjusted analyses are given in detail in Table S7.  
52  
53  
54  
55

56  
57 Among those with type 1 diabetes, the adjusted analysis of the HbA<sub>1c</sub> groups showed  
58 significantly lower scores for the high-risk group than the well-controlled group in the eight  
59 PROM scales GenW, MoE, FreW, ManD, DiEx, NLD, NLBS, and SuO as in the PREM scale  
60



1  
2  
3 SuDC. The largest between-group differences were seen in the PROM scales ManD and  
4 DiEx, where the well-controlled group had the significantly highest means, followed by the  
5 sub-optimal group and the high-risk group. Among those with type 2 diabetes, the adjusted  
6 analysis showed that the high-risk group had significantly lower scores than the well-  
7 controlled group in all scales but CoDC. In the five PROM scales MoE, FreW, ManD, NLD,  
8 and NLBS, the well-controlled group had the significantly highest means, followed by the  
9 sub-optimal and high-risk groups. The largest between-group differences were seen in MoE,  
10 FreW, NLD, and NLBS (Fig. 4, Table S7).  
11  
12  
13  
14  
15  
16  
17

## 18 **DISCUSSION**

19  
20 From a nationwide setting with a large sample of adults with type 1 and type 2 diabetes  
21 selected at random, we present the outcome from the Diabetes Questionnaire. To study  
22 construct validity, we assess the associations of that outcome with clinical variables and  
23 generic health-related quality of life, as measured by the SF-36v2 and assess the sensitivity to  
24 differences between clinically relevant groups of glycaemic control. We found supporting  
25 evidence for construct validity in both type 1 and type 2 diabetes. As expected, there were few  
26 statistically significant correlations with the clinical variables. The observed correlations were  
27 weak, and most were negative. Also as expected, the correlations with the SF-36v2 domains  
28 were positive; the strongest correlations were found in the Diabetes Questionnaire PROM  
29 scales GenW and MoE. Furthermore, either weak or no correlations were seen in the PREM  
30 scales. In machine learning analyses, the SF-36v2 domains and the clinical variables together  
31 explained the variance in the PROM scales GenW and MoE to about 40-45%. In the other  
32 scales, the variance explained was low. In regression analyses among three groups with  
33 differing levels of HbA<sub>1c</sub> adjusted for demographics, other risk factors, and diabetes  
34 complications, the high-risk group had statistically significantly lower scores than the well-  
35 controlled group in most Diabetes Questionnaire scales for participants with type 1 diabetes  
36 and in almost all scales for those with type 2 diabetes. Statistically significant differences  
37 between all three groups of glycaemic control were seen in two scales for type 1 diabetes and  
38 in five scales for type 2 diabetes.  
39  
40  
41  
42  
43  
44  
45  
46  
47  
48  
49  
50  
51  
52  
53

## 54 **Findings and implications**

55 Evaluating the measurement qualities of a questionnaire is a complex and cumulative  
56 effort.[13, 20] In this study, we continue the evaluation of the Diabetes Questionnaire by  
57 addressing its construct validity. The results show supporting evidence that the Diabetes  
58  
59  
60

1  
2  
3 Questionnaire targets different concepts than the clinical variables for diabetes care  
4 traditionally covered by the NDR. Thus, the central aspects covered by the Diabetes  
5 Questionnaire including patient perspectives on how they feel, how their diabetes treatment is  
6 going, or their experiences of support from diabetes care cannot be measured by HbA<sub>1c</sub> or  
7 other tested clinical variables. Nor can the clinical variables be estimated through the Diabetes  
8 Questionnaire. We need the combination. There is a growing emphasis that the perspectives  
9 of those living with diabetes should be part of clinical meetings and be given priority among  
10 outcomes in diabetes care assessments.[1, 5, 6, 21-23] Supplementing decision-making by  
11 adding the patient's perspective is suggested to increase the focus on these aspects in clinical  
12 meetings[2, 24] and to enhance the quality of care.[24-26] In Sweden, the Patient Act  
13 strengthens the patient's position and possibilities for shared decision-making and states that  
14 the individual patient's prerequisites and wishes should be taken into account.[27] There is  
15 also a growing movement towards person-centred care aiming for partnership that is centred  
16 on the patient's experience and individual prerequisites, resources, and barriers. An important  
17 basis is the patient's story.[28] We hope that the Diabetes Questionnaire can support the  
18 patient story if used in the clinical meetings together with the clinical variables.

19  
20  
21  
22  
23  
24  
25  
26  
27  
28  
29  
30  
31  
32 The Diabetes Questionnaire is unique in being developed to support clinical meetings with  
33 individuals and to be used as a means for quality improvement through longitudinal  
34 assessment at a local, regional, and national levels within the frame of a nationwide healthcare  
35 quality register.[7-9] Many other questionnaires for diabetes were developed to target a  
36 specific aspect within intervention studies.[3, 17, 18] The Diabetes Questionnaire has a broad  
37 approach with aspects identified as important to adults with diabetes.[8, 9] The Diabetes  
38 Questionnaire is also developed using the vocabulary and phrasing of people with diabetes,[8]  
39 unlike many other questionnaires that often use academic or professional jargon. In this study,  
40 we found supporting evidence that the Diabetes Questionnaire is sensitive to statistically  
41 significant differences between clinically relevant subgroups with differing levels of  
42 glycaemic control. The Diabetes Questionnaire was also found to capture some aspects of  
43 generic health-related quality of life, while also adding aspects that are not covered by the  
44 often-recommended SF-36v2. For routine use within clinical diabetes care, the Diabetes  
45 Questionnaire is likely more relevant than the generic SF-36v2. A limitation of the Diabetes  
46 Questionnaire is, however, the currently limited opportunity for international comparisons.  
47 The opportunities and barriers related to clinical use of the Diabetes Questionnaire are  
48 currently being studied from the perspectives of professionals and adults with diabetes.

## Strengths and weaknesses

Among the strengths of this study are the large and heterogeneous sample of adults with type 1 and type 2 diabetes selected at random from the nationwide NDR. The respondents were representative of the 2015 population in the NDR (data on file). The results can be considered representative of the Swedish adult population with diabetes related to the coverage rate of about 90% in 2015 when around 40,000 adults with type 1 diabetes and 347,000 with type 2 diabetes were registered in the NDR. Through the NDR, we had access to clinical variables relevant for diabetes care and background data for the non-respondents. Another strength is the use of a well-known measure of health-related quality of life. As there is a lack of agreed-upon benchmarks for how strong positive correlations between questionnaires addressing subjective aspects should be to support convergent construct validity,[29, 30] this study based the division of the correlation strength on reports that such correlations generally are low,[30, 31] often within the range 0.20-0.40[31] or 0.40-0.60[30]. A correlation of 0.60 has been suggested to be extremely strong, as the random error of measurement of the two questionnaires impede perfect correlations.[30] As the Diabetes Questionnaire and the SF-36v2 do not measure the exact same construct, there were no prerequisites for broad strong correlations.[13, 30, 31]

Our study also has limitations. The analyses were limited to the respondents and might reflect a group that is more motivated to participate. Another limitation is that the questionnaires were only offered in Swedish, potentially resulting in a higher proportion of foreign-born individuals among the non-responders than among the respondents. Furthermore, the cross-sectional design means that it is not possible to make causal conclusions.

## Future perspectives

The evaluation of construct validity is a work of putting the pieces together.[13, 20] Consequently, more studies are needed to relate the Diabetes Questionnaire to different concepts and measures. An important task for diabetes care is to identify suitable interventions that adequately can support individuals with diabetes. The Diabetes Questionnaire can be an important contribution to identify the need and focus for targeted interventions, especially for adults with low scores. In future studies, it is important to evaluate the potential of using scores from the Diabetes Questionnaire scales as the primary selection base or in combination with, for example, HbA<sub>1c</sub> levels or BMI. It is also essential to

1  
2  
3 evaluate whether the Diabetes Questionnaire scales are responsive to actual changes and can  
4 be used as an evaluative tool adding patient perspectives to both nursing and medical  
5 interventions, longitudinal assessments, and quality improvement. The NDR is established as  
6 a clinical and a national assessment tool in Swedish diabetes care.[4, 32-34] By now, the  
7 Diabetes Questionnaire is digitally and freely available for use by all clinics in Sweden  
8 connected to the NDR. The Diabetes Questionnaire is also included as the basis for  
9 developmental quality indicators in the Swedish national guidelines for diabetes care.[4] In  
10 the future, the Diabetes Questionnaire can be amongst the established quality indicators  
11 bringing patient perspectives to the fore for diabetes care.  
12  
13  
14  
15  
16  
17  
18  
19

## 20 **Conclusion**

21 This nationwide study shows that the Diabetes Questionnaire captures some generic health-  
22 related quality of life dimensions as well as adds diabetes-specific information not covered by  
23 the SF-36v2 and clinical variables. The Diabetes Questionnaire is also sensitive to differences  
24 between clinically relevant groups of glycaemic control.  
25  
26  
27  
28  
29

## 30 **List of abbreviations**

31 Abbreviations related to the Diabetes Questionnaire

32 GenW: General Well-being

33 MoE: Mood and Energy

34 FreW: Free of Worries about blood sugar

35 ManD: Capabilities to Manage your Diabetes

36 DiEx: Diet and Exercise

37 NLD: Not Limited by Diabetes

38 NLBS: Not Limited by Blood Sugar

39 SuO: Support from Others

40 SuDC: Support from Diabetes Care

41 AcDC: Access to Diabetes Care

42 CoDC: Continuity in Diabetes Care

43 MDMT: Medical Devices and Medical Treatment

44 PREM: Patient-reported experience measure

45 PROM: Patient-reported outcome measure  
46  
47  
48  
49  
50  
51  
52  
53  
54  
55  
56  
57  
58  
59  
60

### Abbreviations related to the SF-36v2 survey

PF: Physical functioning

RP: Role-physical

BP: Bodily pain

GH: General health

VT: Vitality

SF: Social functioning

RE: Role-emotional

MH: Mental health

### Acknowledgements

The authors wish to thank Ebba Linder for facilitating data collection, Mervete Miftaraj for data management, and Ann-Marie Svensson for intellectual advice and support during the processes of design and ethical approval. Parts of the presented data have been published in an abstract and were presented at the Annual Meeting of the European Association for the Study of Diabetes (EASD) in 2019 and within a doctoral thesis at Gothenburg university, Sweden, in 2019.

### Competing interests

Dr. Eeg-Olofsson reports grants from the ALF agreement (ALFGBG 698991), during the conduct of the study; personal fees from Abbott, personal fees from Lilly, personal fees from Novo Nordisk, personal fees from Bayer, outside the submitted work; Dr. Gudbjörnsdottir reports grants from the ALF-agreement (ALFGBG 725311), during the conduct of the study; grants and personal fees from AstraZeneca, grants and personal fees from Boehringer Ingelheim, grants and personal fees from Eli Lilly, grants and personal fees from Merck Sharp & Dohme, grants and personal fees from Novo Nordisk, grants and personal fees from Sanofi, outside the submitted work; the other authors declare that they have nothing to disclose.

### Funding

This work was supported by Dalarna University, Falun; Uppsala University, Uppsala; the Sahlgrenska University Hospital, Gothenburg; the Swedish Diabetes Foundation; and the Sophiahemmet Foundation, Stockholm. Unrestricted grants were provided by Astra Zeneca, MSD, Novo Nordisk, and the Swedish state under the agreement between the Swedish government and the county councils, the ALF-agreement (Nos. ALFGBG-725311 and

1  
2  
3 ALFGBG-698991). None of the funding providers have influenced the design of the study;  
4 the collection, analysis, or interpretation of data; the writing of the manuscript, or any  
5 publication decision at any stage.  
6  
7  
8  
9

### 10 **Author Contributions**

11 MSE made substantial contributions to the design of the work, applying for ethical approval  
12 and funding, interpreting the data, and drafting and revising the manuscript (major  
13 contributor). JL and UBJ supervised and made substantial contributions to the design of the  
14 work, applied for funding, made intellectual contributions in the interpretation of the data,  
15 critically revised the manuscript for important intellectual content, and contributed experience  
16 and knowledge from diabetes care and research in diabetes and health-related quality of life.  
17 SB made substantial contributions to the design of the work, made intellectual contributions  
18 in the interpretation of the data, and critically revised the manuscript for important intellectual  
19 content. BP made substantial contributions to the design of the work; performed the selection  
20 of the random sample; made intellectual contributions in the interpretation of the data;  
21 critically revised the manuscript for important intellectual content, and contributed statistical  
22 advice, experience, and knowledge in the research of generic health-related quality of life and  
23 patient-reported outcome. SF made substantial contributions to the design of the work,  
24 contributed substantial statistical advice, was the major contributor in analysing the data,  
25 made substantial intellectual contributions in the interpretation of the data, and critically  
26 revised the manuscript for important intellectual content. SG supervised and made substantial  
27 contributions to the design of the work; applied for ethical approval and funding; made  
28 intellectual contributions in interpretation of the data; critically revised the manuscript for  
29 important intellectual content, and contributed medical experience and knowledge from  
30 diabetes care, diabetes research, and research using health-care quality registers. KEO  
31 supervised and made substantial contributions to the design of the work; applied for ethical  
32 approval and funding; generated the SF-36v2 data; interpreted the data; critically revised the  
33 manuscript for important intellectual content, and contributed medical experience and  
34 knowledge from diabetes care, diabetes research, and research using health-care quality  
35 registers. All authors read and approved the final manuscript as well as consented to be on the  
36 author list.  
37  
38  
39  
40  
41  
42  
43  
44  
45  
46  
47  
48  
49  
50  
51  
52  
53  
54  
55  
56  
57  
58  
59  
60



## Data sharing statement

The data that support the findings of this study are not publicly available. The study presented here has been subject to review by an ethical board and approved for publication related to the specific aim of our research project. With reference to the European General Data Protection Regulation, the data are personal and therefore confidential.

## REFERENCES

1. Young-Hyman D, de Groot M, Hill-Briggs F, Gonzalez JS, Hood K, Peyrot M. Psychosocial Care for People With Diabetes: A Position Statement of the American Diabetes Association. *Diabetes Care*. 2016;39(12):2126-40. doi: 10.2337/dc16-2053.
2. Polonsky WH. Emotional and quality-of-life aspects of diabetes management. *Curr Diab Rep*. 2002;2(2):153-9.
3. Speight J, Reaney, M. D. & Barnard, K. D. Not all roads lead to Rome—a review of quality of life measurement in adults with diabetes. *Diabetic Medicine*. 2009;26:315–27. doi: DOI: 10.1111/j.1464-5491.2009.02682.x.
4. National Board of Health and Welfare (Socialstyrelsen). National guidelines for diabetes care. [In Swedish]. Nationella riktlinjer för diabetesvård: Stöd för styrning och ledning. [www.socialstyrelsen.se](http://www.socialstyrelsen.se); 2018 October. Report No.: 2018-10-25. [Cited 2019 October 16]. Available from: <https://www.socialstyrelsen.se/regler-och-riktlinjer/nationella-riktlinjer/slutliga-riktlinjer/diabetes/>
5. American Diabetes A. 4. Comprehensive Medical Evaluation and Assessment of Comorbidities: Standards of Medical Care in Diabetes-2020. *Diabetes Care*. 2020;43(Suppl 1):S37-S47. doi: 10.2337/dc20-S004.
6. American Diabetes A. 5. Facilitating Behavior Change and Well-being to Improve Health Outcomes: Standards of Medical Care in Diabetes-2020. *Diabetes Care*. 2020;43(Suppl 1):S48-S65. doi: 10.2337/dc20-S005.
7. Borg S, Eeg-Olofsson K, Palaszewski B, Svedbo Engstrom M, Gerdtham UG, Gudbjörnsdottir S. Patient-reported outcome and experience measures for diabetes: development of scale models, differences between patient groups and relationships with cardiovascular and diabetes complication risk factors, in a combined registry and survey study in Sweden. *BMJ Open*. 2019;9(1):e025033. doi: 10.1136/bmjopen-2018-025033.
8. Svedbo Engstrom M, Leksell J, Johansson U-B, Eeg-Olofsson K, Borg S, Palaszewski B, et al. A disease-specific questionnaire for measuring patient-reported outcomes and experiences in the Swedish National Diabetes Register: Development and evaluation of content validity, face validity, and test-retest reliability. *Patient Educ Couns*. 2018;101(1):139-46. doi: 10.1016/j.pec.2017.07.016.
9. Svedbo Engström M, Leksell J, Johansson U-B, Gudbjörnsdottir S. What is important for you? A qualitative interview study of living with diabetes and experiences of diabetes care to establish a basis for a tailored Patient-Reported Outcome Measure for the Swedish National Diabetes Register. *BMJ Open*. 2016;6(3):e010249. doi: 10.1136/bmjopen-2015-010249.
10. Borg S, Palaszewski B, Gerdtham UG, Fredrik O, Roos P, Gudbjörnsdottir S. Patient-reported outcome measures and risk factors in a quality registry: a basis for more patient-centered diabetes care in Sweden. *Int J Environ Res Public Health*. 2014;11(12):12223-46. doi: 10.3390/ijerph111212223.
11. Sen AK, Nussbaum MC. *The quality of life*. Oxford: Clarendon Press; 1993.
12. Robeyns I. Sen's capability approach and gender inequality: selecting relevant capabilities. *Feminist Economics*. 2003;9 (2-3):61-92. doi: 10.1080/1354570022000078024.

13. Mokkink LB, Terwee CB, Patrick DL, Alonso J, Stratford PW, Knol DL, et al. The COSMIN study reached international consensus on taxonomy, terminology, and definitions of measurement properties for health-related patient-reported outcomes. *J Clin Epidemiol.* 2010;63(7):737-45. doi: 10.1016/j.jclinepi.2010.02.006.
14. Svedbo Engström M, Leksell J, Johansson U-B, Borg S, Palaszewski B, Franzén S, et al. Health-related quality of life and glycaemic control among adults with type 1 and type 2 diabetes – a nationwide cross-sectional study. *Health and Quality of Life Outcomes.* 2019;17(141):1-11. doi: 10.1186/s12955-019-1212-z.
15. Ware JE, Jr. SF-36 health survey update. *Spine.* 2000;25(24):3130-9. doi:
16. Maruish ME, editor. User's manual for the SF-36v2 Health Survey. 3rd ed. ed: Lincoln, RI: QualityMetric Incorporated; 2011.
17. Fitzpatrick R, Bowling A, Gibbons E, Haywood K, Jenkinson C, Mackintosh A, et al. A structured review of patient-reported measures in relation to selected chronic conditions, perceptions of quality of care and carer impact National Centre for Health Outcomes Development (Oxford site): Unit of Health-Care Epidemiology, Department of Public Health, University of Oxford; 2006. Available from: <http://phi.uhce.ox.ac.uk/>
18. Gibbons E, Fitzpatrick R, Patient Reported Outcome Measurement Group. A structured review of patient-reported outcome measures (PROMs) for diabetes. University of Oxford 2009.
19. Norris SL, McNally TK, Zhang X, Burda B, Chan B, Chowdhury FM, et al. Published norms underestimate the health-related quality of life among persons with type 2 diabetes. *J Clin Epidemiol.* 2011;64(4):358-65. doi: 10.1016/j.jclinepi.2010.04.016.
20. Fayers PM, Machin D. Quality of life: the assessment, analysis, and reporting of patient-reported outcomes. Third ed. Chichester, West Sussex, UK; Hoboken, NJ: John Wiley & Sons Inc.; 2016.
21. Jones A, Vallis M, Pouwer F. If it does not significantly change HbA1c levels why should we waste time on it? A plea for the prioritization of psychological well-being in people with diabetes. *Diabet Med.* 2015;32(2):155-63. doi: 10.1111/dme.12620.
22. Glasgow RE, Peeples M, Skovlund SE. Where is the patient in diabetes performance measures? The case for including patient-centered and self-management measures. *Diabetes Care.* 2008;31(5):1046-50. doi: 10.2337/dc07-1845.
23. IDF Clinical Guidelines Task Force. Global Guideline for Type 2 Diabetes: recommendations for standard, comprehensive, and minimal care. *Diabet Med.* 2006;23(6):579-93. doi: 10.1111/j.1464-5491.2006.01918.x.
24. Kotronoulas G, Kearney N, Maguire R, Harrow A, Di Domenico D, Croy S, et al. What is the value of the routine use of patient-reported outcome measures toward improvement of patient outcomes, processes of care, and health service outcomes in cancer care? A systematic review of controlled trials. *J Clin Oncol.* 2014;32(14):1480-501. doi: 10.1200/JCO.2013.53.5948.
25. Reay N. How to measure patient experience and outcomes to demonstrate quality in care. *Nurs Times.* 2010;106(7):12-4.
26. Snyder CF, Aaronson NK, Choucrair AK, Elliott TE, Greenhalgh J, Halyard MY, et al. Implementing patient-reported outcomes assessment in clinical practice: a review of the options and considerations. *Qual Life Res.* 2012;21(8):1305-14. doi: 10.1007/s11136-011-0054-x.
27. Patient Act [Swedish]. Patientlag (2014:821).
28. Ekman I, Swedberg K, Taft C, Lindseth A, Norberg A, Brink E, et al. Person-centered care--ready for prime time. *Eur J Cardiovasc Nurs.* 2011;10(4):248-51. doi: 10.1016/j.ejcnurse.2011.06.008.



- 1  
2  
3 29. Post MW. What to Do With "Moderate" Reliability and Validity Coefficients? *Arch Phys*  
4 *Med Rehabil.* 2016;97(7):1051-2. doi: 10.1016/j.apmr.2016.04.001.  
5  
6 30. McDowell I. *Measuring health : a guide to rating scales and questionnaires.* 3rd ed.  
7 Oxford ; New York: Oxford University Press; 2006. xvi, 748 p. p.  
8 31. Polit DF, Beck CT. *Nursing research : generating and assessing evidence for nursing*  
9 *practice.* Philadelphia: Wolters Kluwer Health/Lippincott Williams & Wilkins; 2012.  
10 32. Svensson AM, Gudbjörnsdóttir, S., Samuelsson, P., Miftaraj, M., Eliasson, B.,  
11 Cederholm, J., Rawshani, A. 20 years of successful improvements. Gothenburg, Sweden;  
12 2016. Available from: [www.ndr.nu](http://www.ndr.nu)  
13 33. Eliasson B, Gudbjörnsdóttir S. Diabetes care - improvement through measurement.  
14 *Diabetes Res Clin Pract.* 2014;106 Suppl 2:S291-4. doi: 10.1016/S0168-8227(14)70732-6.  
15 34. Gudbjörnsdóttir S, Cederholm J, Nilsson PM, Eliasson B. The National Diabetes Register  
16 in Sweden: an implementation of the St. Vincent Declaration for Quality Improvement in  
17 Diabetes Care. *Diabetes Care.* 2003;26(4):1270-6.  
18  
19  
20  
21

## 22 **Figure Legends**

23 Fig. 1. Spearman's rank correlation between the Diabetes Questionnaire scales and the  
24 SF-36v2 domains in type 1 diabetes  
25  
26  
27

28 Diabetes Questionnaire scales: GenW: General Wellbeing; MoE: Mood and Energy; FreW:  
29 Free of Worries about blood sugar; ManD: Capabilities to Manage your Diabetes; DiEx: Diet  
30 and Exercise; NLD: Not Limited by Diabetes; NLBS: Not Limited by Blood Sugar; SuO:  
31 Support from Others; SuDC: Support from Diabetes Care; AcDC: Access to Diabetes Care;  
32 CoDC: Continuity in Diabetes Care; MDMT: Medical Devices and Medical Treatment.  
33 SF-36v2 domains: PF: physical functioning; RP: role-physical; BP: bodily pain; GH: general  
34 health.  
35  
36  
37  
38  
39

40  
41  
42 Fig. 2. Spearman's rank correlation between the Diabetes Questionnaire scales and the  
43 SF-36v2 domains in type 2 diabetes  
44  
45  
46

47 Diabetes Questionnaire scales: GenW: General Wellbeing; MoE: Mood and Energy; FreW:  
48 Free of Worries about blood sugar; ManD: Capabilities to Manage your Diabetes; DiEx: Diet  
49 and Exercise; NLD: Not Limited by Diabetes; NLBS: Not Limited by Blood Sugar; SuO:  
50 Support from Others; SuDC: Support from Diabetes Care; AcDC: Access to Diabetes Care;  
51 CoDC: Continuity in Diabetes Care; MDMT: Medical Devices and Medical Treatment.  
52 SF-36v2 domains: PF: physical functioning; RP: role-physical; BP: bodily pain; GH: general  
53 health.  
54  
55  
56  
57  
58  
59  
60

Fig. 3. Percent variance in the Diabetes Questionnaire scales explained by the SF-36v2 domains and clinical variables in type 1 (A) and type 2 diabetes (B)

GenW: General Wellbeing; MoE: Mood and Energy; FreW: Free of Worries about blood sugar; ManD: Capabilities to Manage your Diabetes; DiEx: Diet and Exercise; NLD: Not Limited by Diabetes; NLBS: Not Limited by Blood Sugar; SuO: Support from Others; SuDC: Support from Diabetes Care; AcDC: Access to Diabetes Care; CoDC: Continuity in Diabetes Care; MDMT: Medical Devices and Medical Treatment.

Fig. 4. Adjusted least square mean estimates with 95% confidence intervals for the Diabetes Questionnaire scales in type 1 diabetes (A) and type 2 diabetes (B) separated by glycated haemoglobin (HbA<sub>1c</sub>) level

Adjusted for age, sex, diabetes duration, body mass index, systolic blood pressure, LDL cholesterol level, micro- and macro-albuminuria, estimated glomerular filtration rate, retinopathy, smoking status, physical activity level, receipt of antihypertensive and lipid lowering treatments, previous coronary heart disease and previous stroke.

GenW: General Wellbeing; MoE: Mood and Energy; FreW: Free of Worries about blood sugar; ManD: Capabilities to Manage your Diabetes; DiEx: Diet and Exercise; NLD: Not Limited by Diabetes; NLBS: Not Limited by Blood Sugar; SuO: Support from Others; SuDC: Support from Diabetes Care; AcDC: Access to Diabetes Care; CoDC: Continuity in Diabetes Care; MDMT: Medical Devices and Medical Treatment.

### Supplementary material

Supplementary figures

Fig. S1. Spearman's rank correlation between the Diabetes Questionnaire scales and clinical variables in type 1 diabetes

Diabetes Questionnaire scales: GenW: General Wellbeing; MoE: Mood and Energy; FreW: Free of Worries about blood sugar; ManD: Capabilities to Manage your Diabetes; DiEx: Diet and Exercise; NLD: Not Limited by Diabetes; NLBS: Not Limited by Blood Sugar; SuO: Support from Others; SuDC: Support from Diabetes Care; AcDC: Access to Diabetes Care; CoDC: Continuity in Diabetes Care; MDMT: Medical Devices and Medical Treatment.

1  
2  
3 Clinical variables: BMI: body mass index, SBP: systolic blood pressure, LDL: LDL  
4 cholesterol, HbA<sub>1c</sub>: glycated haemoglobin level.  
5  
6  
7

8 Fig. S2. Spearman's rank correlation between the Diabetes Questionnaire scales and clinical  
9 variables in type 2 diabetes  
10  
11  
12

13 Diabetes Questionnaire scales: GenW: General Wellbeing; MoE: Mood and Energy; FreW:  
14 Free of Worries about blood sugar; ManD: Capabilities to Manage your Diabetes; DiEx: Diet  
15 and Exercise; NLD: Not Limited by Diabetes; NLBS: Not Limited by Blood Sugar; SuO:  
16 Support from Others; SuDC: Support from Diabetes Care; AcDC: Access to Diabetes Care;  
17 CoDC: Continuity in Diabetes Care; MDMT: Medical Devices and Medical Treatment.  
18 Clinical variables: BMI: body mass index, SBP: systolic blood pressure, LDL: LDL  
19 cholesterol, HbA<sub>1c</sub>: glycated haemoglobin level.  
20  
21  
22  
23  
24  
25  
26

27 Fig. S3. Variable importance of clinical variables and the SF-36v2 domains as predictors of  
28 the Diabetes Questionnaire scales GenW (General Wellbeing) and MoE (Mood and Energy)  
29 in type 1 (A and B) and type 2 diabetes (C and D)  
30  
31  
32  
33

34 Clinical variables: BMI: body mass index, SBP: systolic blood pressure, LDL: LDL  
35 cholesterol, HbA<sub>1c</sub>: glycated haemoglobin level.  
36 SF-36v2 domains: PF: physical functioning; RP: role-physical; BP: bodily pain; GH: general  
37 health; VT: vitality; SF: social functioning; RE: role-emotional; MH: mental health.  
38  
39  
40  
41  
42

#### 43 Supplementary tables

44 Table S1. Crude means and standard deviations for the Diabetes Questionnaire scales and the  
45 SF-36v2 domains for participants with type 1 diabetes and those with type 2 diabetes  
46  
47  
48

49 Table S2. Clinical and demographic characteristics for non-respondents separated for type 1  
50 and type 2 diabetes  
51  
52  
53

54 Table S3. Spearman's rank correlations with p-values between the Diabetes Questionnaire  
55 scale scores and clinical variables in type 1 diabetes  
56  
57  
58  
59  
60

1  
2  
3 Table S4. Spearman's rank correlations with p-values between the Diabetes Questionnaire  
4 scale scores and clinical variables in type 2 diabetes  
5  
6  
7

8 Table S5. Spearman's rank correlations with p-values between the Diabetes Questionnaire  
9 scales and the SF-36v2 domains in type 1 diabetes  
10  
11  
12

13 Table S6. Spearman's rank correlations with p-values between the Diabetes Questionnaire  
14 scales and the SF-36v2 domains in type 2 diabetes  
15  
16  
17

18 Table S7. Least square mean estimates and 95% confidence intervals for the Diabetes  
19 Questionnaire scales in three glycated haemoglobin (HbA<sub>1c</sub>) groups for type 1 and type 2  
20 diabetes  
21  
22  
23  
24  
25  
26  
27  
28  
29  
30  
31  
32  
33  
34  
35  
36  
37  
38  
39  
40  
41  
42  
43  
44  
45  
46  
47  
48  
49  
50  
51  
52  
53  
54  
55  
56  
57  
58  
59  
60

**Spearman's rank correlation, Diabetes Questionnaire and SF-36v2 domains, type 1 diabetes**

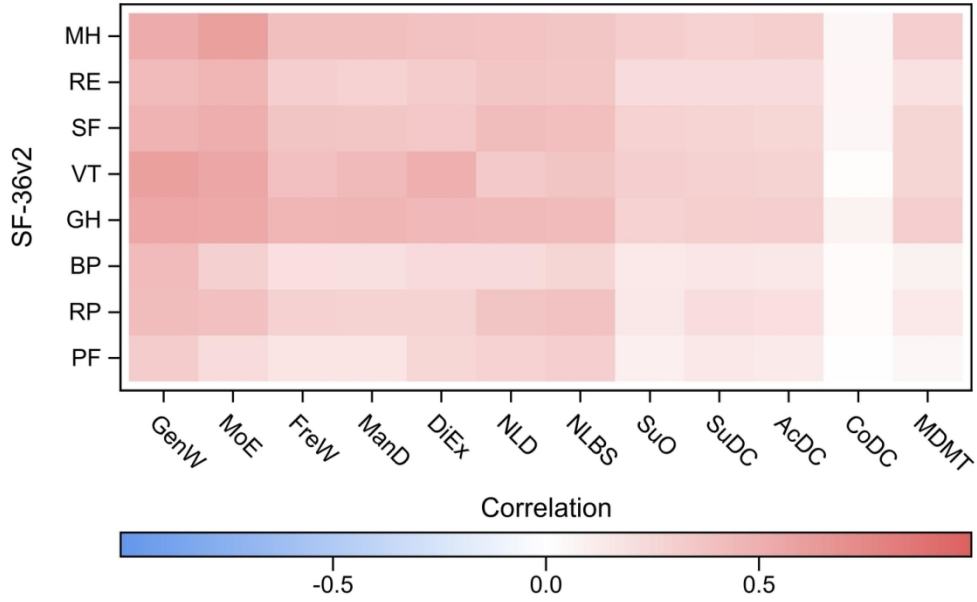

Fig. 1. Spearman's rank correlation between the Diabetes Questionnaire scales and the SF 36v2 domains in type 1 diabetes

127x88mm (300 x 300 DPI)

**Spearman's rank correlation, Diabetes Questionnaire scales and SF-36v2, type 2 diabetes**

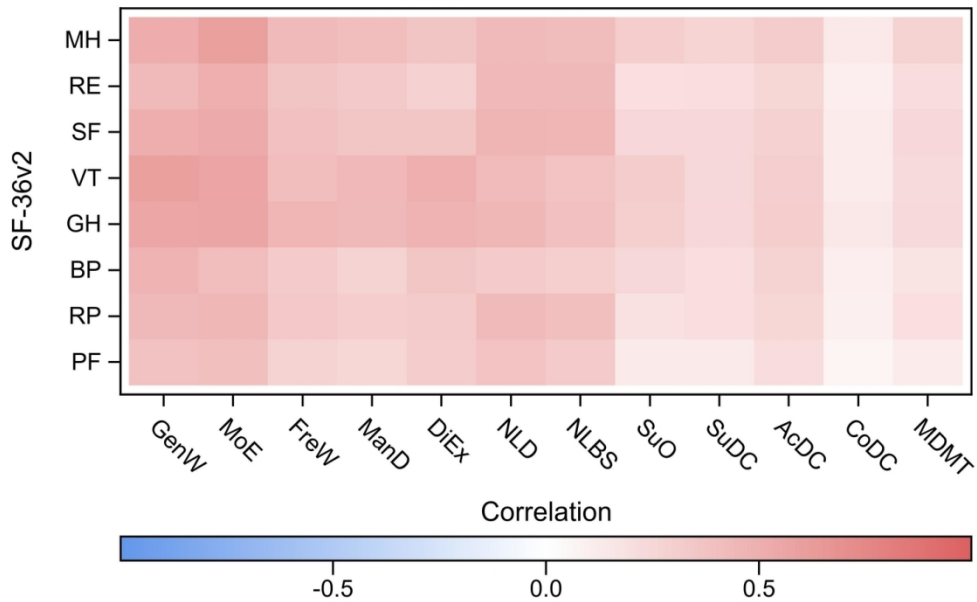

Fig. 2. Spearman's rank correlation between the Diabetes Questionnaire scales and the SF 36v2 domains in type 2 diabetes

127x88mm (300 x 300 DPI)

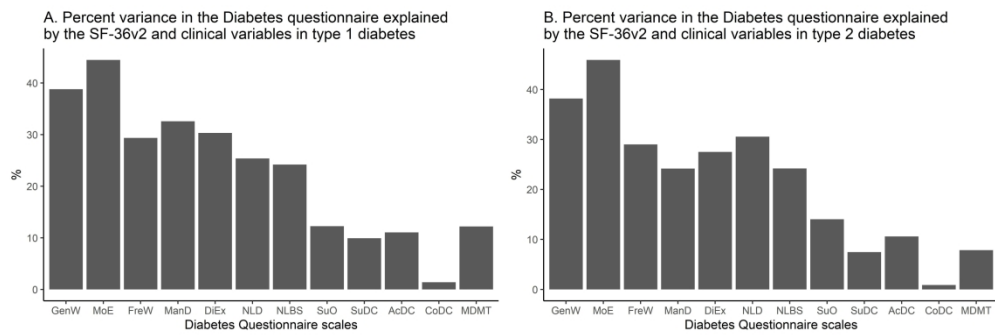

Fig. 3. Percent variance in the Diabetes Questionnaire scales explained by the SF 36v2 domains and clinical variables in type 1 (A) and type 2 diabetes (B)

304x101mm (300 x 300 DPI)

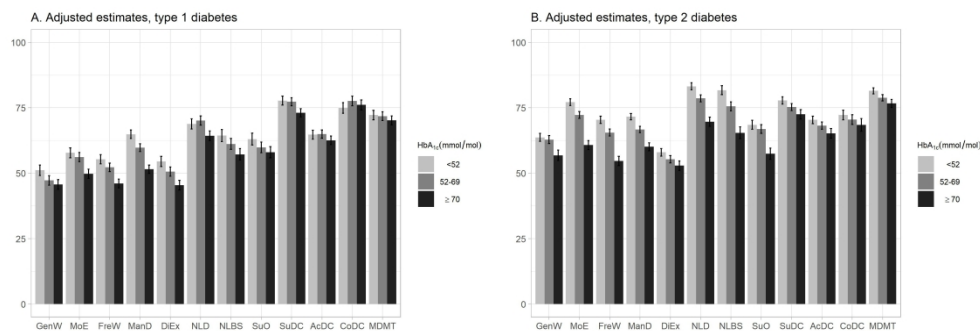

Fig. 4. Adjusted least square mean estimates with 95% confidence intervals for the Diabetes Questionnaire scales in type 1 diabetes (A) and type 2 diabetes (B) separated by glycated haemoglobin (HbA1c) level

349x119mm (300 x 300 DPI)



## SUPPLEMENTARY MATERIAL

*To the article titled*

New diabetes questionnaire to add patients' perspectives to diabetes care for adults with type 1 and type 2 diabetes – Nationwide cross-sectional study of construct validity assessing associations with generic health-related quality of life and clinical variables

*By*

Maria Svedbo Engström; Janeth Leksell; Unn-Britt Johansson; Sixten Borg, Bo Palaszewski; Stefan Franzén; Soffia Gudbjörnsdottir; Katarina Eeg-Olofsson

*Submitted to BMJ Open*

### Supplementary figures

**Fig. S1.** Spearman's rank correlation between the Diabetes Questionnaire scales and clinical variables in type 1 diabetes

**Spearman's rank correlation, Diabetes Questionnaire and clinical variables, type 1 diabetes**

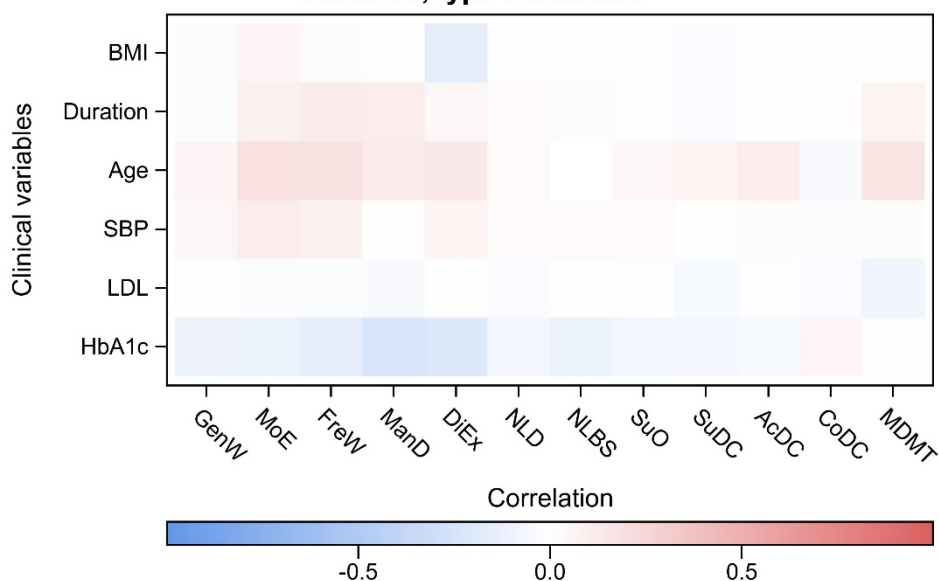

Diabetes Questionnaire scales: GenW: General Wellbeing; MoE: Mood and Energy; FreW: Free of Worries about blood sugar; ManD: Capabilities to Manage your Diabetes; DiEx: Diet and Exercise; NLD: Not Limited by Diabetes; NLBS: Not Limited by Blood Sugar; SuO: Support from Others; SuDC: Support from Diabetes Care; AcDC: Access to Diabetes Care; CoDC: Continuity in Diabetes Care; MDMT: Medical Devices and Medical Treatment.  
Clinical variables: BMI: body mass index, SBP: systolic blood pressure, LDL: LDL cholesterol, HbA<sub>1c</sub>: glycated haemoglobin level.

Svedbo Engström et al. A new diabetes questionnaire to add patients' perspectives to diabetes care for adults with type 1 and type 2 diabetes – A nationwide cross-sectional study of associations with generic health-related quality of life and clinical variables

**Fig. S2.** Spearman's rank correlation between the Diabetes Questionnaire scales and clinical variables in type 2 diabetes

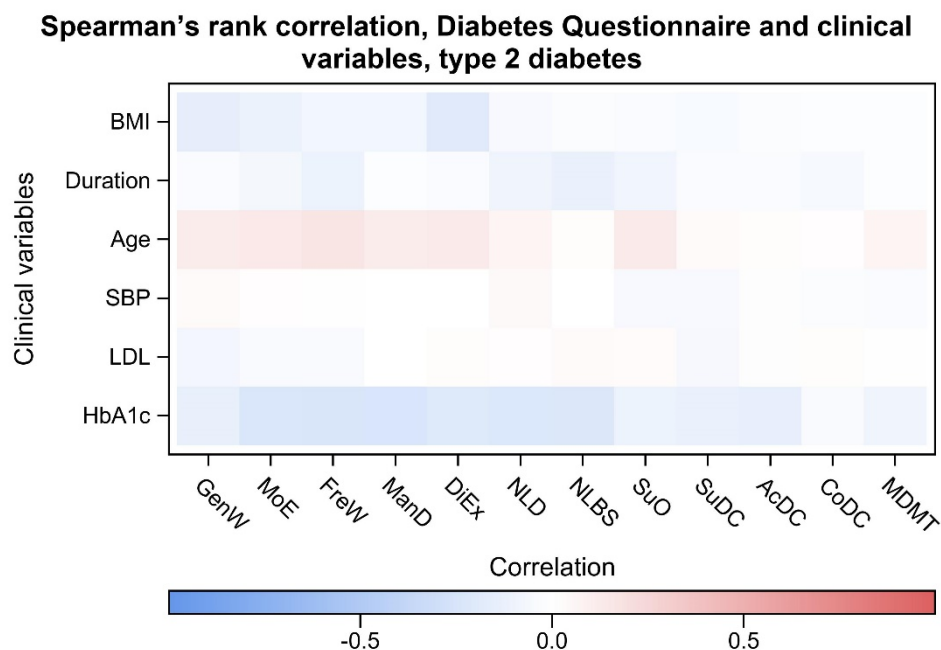

Diabetes Questionnaire scales: GenW: General Wellbeing; MoE: Mood and Energy; FreW: Free of Worries about blood sugar; ManD: Capabilities to Manage your Diabetes; DiEx: Diet and Exercise; NLD: Not Limited by Diabetes; NLBS: Not Limited by Blood Sugar; SuO: Support from Others; SuDC: Support from Diabetes Care; AcDC: Access to Diabetes Care; CoDC: Continuity in Diabetes Care; MDMT: Medical Devices and Medical Treatment.  
 Clinical variables: BMI: body mass index, SBP: systolic blood pressure, LDL: LDL cholesterol, HbA<sub>1c</sub>: glycated haemoglobin level.

Svedbo Engström et al. A new diabetes questionnaire to add patients' perspectives to diabetes care for adults with type 1 and type 2 diabetes – A nationwide cross-sectional study of associations with generic health-related quality of life and clinical variables

**Fig. S3.** Variable importance of clinical variables and the SF-36v2 domains as predictors of the Diabetes Questionnaire scales GenW (General Wellbeing) and MoE (Mood and Energy) in type 1 (A and B) and type 2 diabetes (C and D)

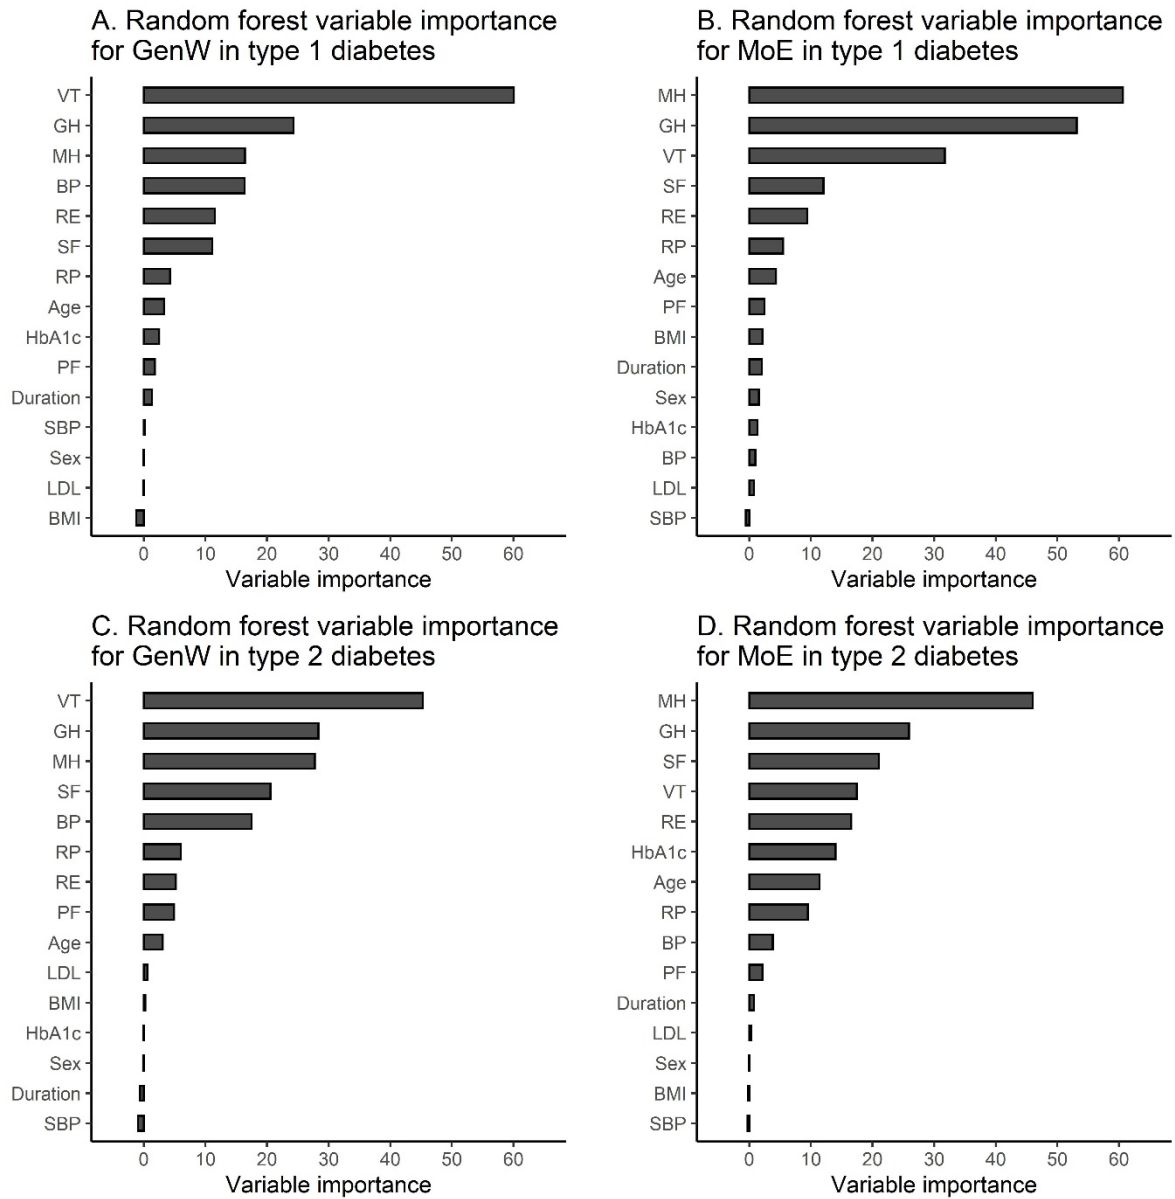

Clinical variables: BMI: body mass index, SBP: systolic blood pressure, LDL: LDL cholesterol, HbA<sub>1c</sub>: glycated haemoglobin level.

SF-36v2 domains: PF: physical functioning; RP: role-physical; BP: bodily pain; GH: general health; VT: vitality; SF: social functioning; RE: role-emotional; MH: mental health.

Svedbo Engström et al. A new diabetes questionnaire to add patients' perspectives to diabetes care for adults with type 1 and type 2 diabetes – A nationwide cross-sectional study of associations with generic health-related quality of life and clinical variables

## Supplementary tables

**Table S1.** Crude means and standard deviations for the Diabetes Questionnaire scales and the SF-36v2 domains for participants with type 1 diabetes and those with type 2 diabetes

| Diabetes Questionnaire scale | Type 1 diabetes | Type 2 diabetes | p-value | Standardized mean difference, SMD |
|------------------------------|-----------------|-----------------|---------|-----------------------------------|
| GenW                         | 59.69 (23.81)   | 63.76 (24.71)   | <0.001  | 0.168                             |
| MoE                          | 64.07 (23.60)   | 75.19 (22.25)   | <0.001  | 0.485                             |
| FreW                         | 54.89 (21.91)   | 69.03 (22.29)   | <0.001  | 0.640                             |
| ManD                         | 63.20 (20.16)   | 70.48 (19.89)   | <0.001  | 0.364                             |
| DiEx                         | 56.66 (24.36)   | 58.88 (24.08)   | 0.018   | 0.092                             |
| NLD                          | 75.33 (23.47)   | 84.14 (21.70)   | <0.001  | 0.390                             |
| NLBS                         | 69.97 (26.94)   | 80.94 (26.84)   | <0.001  | 0.408                             |
| SuO                          | 62.32 (23.46)   | 66.26 (23.71)   | <0.001  | 0.167                             |
| SuDC                         | 78.35 (20.29)   | 77.89 (22.61)   | 0.574   | 0.022                             |
| AcDC                         | 67.80 (20.73)   | 71.31 (22.61)   | <0.001  | 0.162                             |
| CoDC                         | 80.04 (23.29)   | 71.42 (27.39)   | <0.001  | 0.339                             |
| MDMT                         | 75.40 (21.78)   | 80.47 (18.39)   | <0.001  | 0.252                             |

Diabetes questionnaire scales: GenW: General Wellbeing; MoE: Mood and Energy; FreW: Free of Worries about blood sugar; ManD: Capabilities to Manage your Diabetes; DiEx: Diet and Exercise; NLD: Not Limited by Diabetes; NLBS: Not Limited by Blood Sugar; SuO: Support from Others; SuDC: Support from Diabetes Care; AcDC: Access to Diabetes Care; CoDC: Continuity in Diabetes Care; MDMT: Medical Devices and Medical Treatment.

Svedbo Engström et al. A new diabetes questionnaire to add patients' perspectives to diabetes care for adults with type 1 and type 2 diabetes – A nationwide cross-sectional study of associations with generic health-related quality of life and clinical variables

**Table S2.** Clinical and demographic characteristics for non-responders separated for type 1 and type 2 diabetes

| Variable                           | Type 1 diabetes (n=1106) | Type 2 diabetes (n=1116) |
|------------------------------------|--------------------------|--------------------------|
| Men, %                             | 60.7                     | 58.1                     |
| Age, years (SD)                    | 41.2 (15.5)              | 62.8 (10.9)              |
| Diabetes duration, years (SD)      | 21.7 (14.0)              | 8.7 (7.0)                |
| HbA <sub>1c</sub> , mmol/mol (SD)  | 65.2 (15.1)              | 54.7 (14.3)              |
| BMI, kg/m <sup>2</sup> (SD)        | 26.1 (4.6)               | 30.9 (5.9)               |
| Systolic blood pressure, mmHg (SD) | 126.1 (14.0)             | 134.7 (15.8)             |
| Antihypertensive medication, %     | 34.6                     | 77.5                     |
| LDL-cholesterol, mmol/L (SD)       | 2.53 (0.79)              | 2.64 (0.93)              |
| Lipid-lowering medication, %       | 37.1                     | 60.5                     |
| Micro-albuminuria, %               | 11.4                     | 18.4                     |
| Macro-albuminuria, %               | 5.6                      | 5.0                      |
| Retinopathy, %                     | 66.2                     | 30.5                     |
| Smoker, %                          | 15.7                     | 18.4                     |
| Physical activity, daily, %        | 20.3                     | 27.1                     |
| <b>Diabetes treatment</b>          |                          |                          |
| Diet alone, %                      | -                        | 20.1                     |
| Oral hypoglycaemic agent alone, %  | -                        | 52.5                     |
| Insulin alone, %                   | 97.2                     | 8.1                      |
| Insulin and oral agent, %          | 2.3                      | 16.7                     |
| Insulin pump users, %              | 19.9                     | -                        |

The descriptive statistics are presented as the means and standard deviations (SD) for continuous variables or number and percentages for categorical variables.

Svedbo Engström et al. A new diabetes questionnaire to add patients' perspectives to diabetes care for adults with type 1 and type 2 diabetes – A nationwide cross-sectional study of associations with generic health-related quality of life and clinical variables

**Table S3.** Spearman's rank correlations with p-values between the Diabetes Questionnaire scale scores and clinical variables in type 1 diabetes

| Clinical variable | GenW                  | MoE                   | FreW                  | ManD                  | DiEx                  | NLD               | NLBS                  | SuO               | SuDC              | AcDC                 | CoDC              | MDMT                 |
|-------------------|-----------------------|-----------------------|-----------------------|-----------------------|-----------------------|-------------------|-----------------------|-------------------|-------------------|----------------------|-------------------|----------------------|
| Age               | 0.06<br>(0.0184)      | 0.19<br>( $<.0001$ )  | 0.18<br>( $<.0001$ )  | 0.13<br>( $<.0001$ )  | 0.14<br>( $<.0001$ )  | 0.03<br>(0.2050)  | 0.01<br>(0.8445)      | 0.05<br>(0.0875)  | 0.07<br>(0.0093)  | 0.11<br>( $<.0001$ ) | -0.04<br>(0.1635) | 0.17<br>( $<.0001$ ) |
| Diabetes duration | -0.02<br>(0.4673)     | 0.09<br>(0.0006)      | 0.13<br>( $<.0001$ )  | 0.11<br>( $<.0001$ )  | 0.05<br>(0.0456)      | 0.04<br>(0.1981)  | -0.02<br>(0.4678)     | -0.01<br>(0.6936) | -0.03<br>(0.2024) | -0.00<br>(0.9883)    | 0.01<br>(0.6045)  | 0.08<br>(0.0027)     |
| HbA <sub>1c</sub> | -0.12<br>( $<.0001$ ) | -0.12<br>( $<.0001$ ) | -0.16<br>( $<.0001$ ) | -0.25<br>( $<.0001$ ) | -0.21<br>( $<.0001$ ) | -0.07<br>(0.0073) | -0.12<br>( $<.0001$ ) | -0.08<br>(0.0101) | -0.07<br>(0.0070) | -0.05<br>(0.0542)    | 0.06<br>(0.0356)  | -0.02<br>(0.5485)    |
| BMI               | -0.02<br>(0.4601)     | 0.07<br>(0.0151)      | 0.03<br>(0.2763)      | -0.01<br>(0.6738)     | -0.15<br>( $<.0001$ ) | -0.01<br>(0.6239) | 0.02<br>(0.5767)      | -0.01<br>(0.6620) | -0.03<br>(0.2568) | -0.00<br>(0.9175)    | 0.02<br>(0.5998)  | 0.01<br>(0.7292)     |
| SBP               | 0.06<br>(0.0231)      | 0.12<br>( $<.0001$ )  | 0.09<br>(0.0005)      | 0.02<br>(0.5036)      | 0.07<br>(0.0072)      | 0.03<br>(0.3393)  | 0.03<br>(0.2152)      | 0.03<br>(0.3092)  | 0.01<br>(0.6002)  | 0.03<br>(0.2773)     | -0.03<br>(0.3239) | 0.03<br>(0.2610)     |
| LDL               | -0.00<br>(0.9452)     | -0.02<br>(0.4805)     | -0.02<br>(0.4380)     | -0.04<br>(0.1549)     | -0.01<br>(0.8077)     | -0.03<br>(0.2406) | -0.00<br>(0.9780)     | -0.02<br>(0.5905) | -0.06<br>(0.0474) | -0.02<br>(0.5275)    | -0.03<br>(0.2873) | -0.09<br>(0.0023)    |

Diabetes questionnaire scales: GenW: General Wellbeing; MoE: Mood and Energy; FreW: Free of Worries about blood sugar; ManD: Capabilities to Manage your Diabetes; DiEx: Diet and Exercise; NLD: Not Limited by Diabetes; NLBS: Not Limited by Blood Sugar; SuO: Support from Others; SuDC: Support from Diabetes Care; AcDC: Access to Diabetes Care; CoDC: Continuity in Diabetes Care; MDMT: Medical Devices and Medical Treatment.

Clinical variables: BMI: body mass index; SBP: systolic blood pressure; LDL: LDL cholesterol; HbA<sub>1c</sub>: glycated haemoglobin level.

Svedbo Engström et al. A new diabetes questionnaire to add patients' perspectives to diabetes care for adults with type 1 and type 2 diabetes – A nationwide cross-sectional study of associations with generic health-related quality of life and clinical variables

**Table S4.** Spearman's rank correlations with p-values between the Diabetes Questionnaire scale scores and clinical variables in type 2 diabetes

| Clinical variable | GenW                  | MoE                   | FreW                  | ManD                  | DiEx                  | NLD                   | NLBS                  | SuO               | SuDC                  | AcDC                  | CoDC              | MDMT              |
|-------------------|-----------------------|-----------------------|-----------------------|-----------------------|-----------------------|-----------------------|-----------------------|-------------------|-----------------------|-----------------------|-------------------|-------------------|
| Age               | 0.12<br>( $<.0001$ )  | 0.14<br>( $<.0001$ )  | 0.16<br>( $<.0001$ )  | 0.12<br>( $<.0001$ )  | 0.14<br>( $<.0001$ )  | 0.07<br>(0.0061)      | 0.02<br>(0.3646)      | 0.13<br>(0.0002)  | 0.04<br>(0.1926)      | 0.02<br>(0.3657)      | 0.01<br>(0.6265)  | 0.07<br>(0.0089)  |
| Diabetes duration | -0.03<br>(0.2226)     | -0.07<br>(0.0202)     | -0.11<br>( $<.0001$ ) | -0.02<br>(0.5662)     | -0.04<br>(0.1868)     | -0.10<br>(0.0007)     | -0.13<br>( $<.0001$ ) | -0.09<br>(0.0184) | -0.04<br>(0.2043)     | -0.03<br>(0.2353)     | -0.06<br>(0.0570) | -0.01<br>(0.6150) |
| HbA <sub>1c</sub> | -0.14<br>( $<.0001$ ) | -0.24<br>( $<.0001$ ) | -0.24<br>( $<.0001$ ) | -0.24<br>( $<.0001$ ) | -0.21<br>( $<.0001$ ) | -0.23<br>( $<.0001$ ) | -0.22<br>( $<.0001$ ) | -0.11<br>(0.0015) | -0.13<br>( $<.0001$ ) | -0.15<br>( $<.0001$ ) | -0.04<br>(0.1270) | -0.09<br>(0.0012) |
| BMI               | -0.15<br>( $<.0001$ ) | -0.12<br>( $<.0001$ ) | -0.08<br>(0.0046)     | -0.08<br>(0.0037)     | -0.20<br>( $<.0001$ ) | -0.05<br>(0.0752)     | -0.03<br>(0.3242)     | -0.03<br>(0.4203) | -0.05<br>(0.0854)     | -0.03<br>(0.3238)     | -0.01<br>(0.6580) | -0.02<br>(0.5507) |
| SBP               | 0.03<br>(0.2195)      | 0.02<br>(0.5649)      | 0.01<br>(0.7496)      | 0.00<br>(0.9131)      | 0.00<br>(0.8954)      | 0.04<br>(0.1082)      | 0.01<br>(0.8433)      | -0.05<br>(0.1746) | -0.05<br>(0.0781)     | -0.01<br>(0.6444)     | -0.02<br>(0.4327) | -0.03<br>(0.2736) |
| LDL               | -0.07<br>(0.0151)     | -0.04<br>(0.1773)     | -0.04<br>(0.1310)     | 0.00<br>(0.9813)      | 0.02<br>(0.4793)      | 0.02<br>(0.5751)      | 0.04<br>(0.2250)      | 0.03<br>(0.4554)  | -0.06<br>(0.0504)     | -0.01<br>(0.7171)     | 0.02<br>(0.5061)  | 0.01<br>(0.8070)  |

Diabetes questionnaire scales: GenW: General Wellbeing; MoE: Mood and Energy; FreW: Free of Worries about blood sugar; ManD: Capabilities to Manage your Diabetes; DiEx: Diet and Exercise; NLD: Not Limited by Diabetes; NLBS: Not Limited by Blood Sugar; SuO: Support from Others; SuDC: Support from Diabetes Care; AcDC: Access to Diabetes Care; CoDC: Continuity in Diabetes Care; MDMT: Medical Devices and Medical Treatment.

Clinical variables: BMI: body mass index; SBP: systolic blood pressure; LDL: LDL cholesterol; HbA<sub>1c</sub>: glycated haemoglobin level.

Svedbo Engström et al. A new diabetes questionnaire to add patients' perspectives to diabetes care for adults with type 1 and type 2 diabetes – A nationwide cross-sectional study of associations with generic health-related quality of life and clinical variables

**Table S5.** Spearman's rank correlations with p-values between the Diabetes Questionnaire scales and the SF-36v2 domains in type 1 diabetes

| Diabetes Questionnaire scale | SF-36v2 domain       |                      |                      |                      |                      |                      |                      |                      |
|------------------------------|----------------------|----------------------|----------------------|----------------------|----------------------|----------------------|----------------------|----------------------|
|                              | PF                   | RP                   | BP                   | GH                   | VT                   | RF                   | SF                   | MH                   |
| GenW                         | 0.33<br>( $<.0001$ ) | 0.43<br>( $<.0001$ ) | 0.43<br>( $<.0001$ ) | 0.56<br>( $<.0001$ ) | 0.60<br>( $<.0001$ ) | 0.43<br>( $<.0001$ ) | 0.48<br>( $<.0001$ ) | 0.53<br>( $<.0001$ ) |
| MoE                          | 0.23<br>( $<.0001$ ) | 0.40<br>( $<.0001$ ) | 0.30<br>( $<.0001$ ) | 0.55<br>( $<.0001$ ) | 0.57<br>( $<.0001$ ) | 0.46<br>( $<.0001$ ) | 0.52<br>( $<.0001$ ) | 0.60<br>( $<.0001$ ) |
| FreW                         | 0.17<br>( $<.0001$ ) | 0.29<br>( $<.0001$ ) | 0.21<br>( $<.0001$ ) | 0.46<br>( $<.0001$ ) | 0.40<br>( $<.0001$ ) | 0.31<br>( $<.0001$ ) | 0.38<br>( $<.0001$ ) | 0.41<br>( $<.0001$ ) |
| ManD                         | 0.18<br>( $<.0001$ ) | 0.28<br>( $<.0001$ ) | 0.20<br>( $<.0001$ ) | 0.47<br>( $<.0001$ ) | 0.44<br>( $<.0001$ ) | 0.29<br>( $<.0001$ ) | 0.37<br>( $<.0001$ ) | 0.41<br>( $<.0001$ ) |
| DiEx                         | 0.26<br>( $<.0001$ ) | 0.28<br>( $<.0001$ ) | 0.23<br>( $<.0001$ ) | 0.45<br>( $<.0001$ ) | 0.51<br>( $<.0001$ ) | 0.32<br>( $<.0001$ ) | 0.35<br>( $<.0001$ ) | 0.39<br>( $<.0001$ ) |
| NLD                          | 0.29<br>( $<.0001$ ) | 0.37<br>( $<.0001$ ) | 0.24<br>( $<.0001$ ) | 0.44<br>( $<.0001$ ) | 0.34<br>( $<.0001$ ) | 0.37<br>( $<.0001$ ) | 0.42<br>( $<.0001$ ) | 0.38<br>( $<.0001$ ) |
| NLBS                         | 0.31<br>( $<.0001$ ) | 0.39<br>( $<.0001$ ) | 0.27<br>( $<.0001$ ) | 0.43<br>( $<.0001$ ) | 0.37<br>( $<.0001$ ) | 0.35<br>( $<.0001$ ) | 0.41<br>( $<.0001$ ) | 0.36<br>( $<.0001$ ) |
| SuO                          | 0.10<br>(0.0017)     | 0.15<br>( $<.0001$ ) | 0.14<br>( $<.0001$ ) | 0.29<br>( $<.0001$ ) | 0.30<br>( $<.0001$ ) | 0.23<br>( $<.0001$ ) | 0.29<br>( $<.0001$ ) | 0.32<br>( $<.0001$ ) |
| SuDC                         | 0.15<br>( $<.0001$ ) | 0.22<br>( $<.0001$ ) | 0.16<br>( $<.0001$ ) | 0.31<br>( $<.0001$ ) | 0.29<br>( $<.0001$ ) | 0.23<br>( $<.0001$ ) | 0.27<br>( $<.0001$ ) | 0.29<br>( $<.0001$ ) |
| AcDC                         | 0.13<br>( $<.0001$ ) | 0.20<br>( $<.0001$ ) | 0.15<br>( $<.0001$ ) | 0.30<br>( $<.0001$ ) | 0.28<br>( $<.0001$ ) | 0.23<br>( $<.0001$ ) | 0.26<br>( $<.0001$ ) | 0.31<br>( $<.0001$ ) |
| CoDC                         | 0.01<br>(0.8176)     | 0.03<br>(0.3182)     | 0.03<br>(0.3309)     | 0.08<br>(0.0027)     | 0.02<br>(0.3822)     | 0.06<br>(0.0375)     | 0.06<br>(0.0297)     | 0.06<br>(0.0335)     |
| MDMT                         | 0.06<br>(0.0240)     | 0.14<br>( $<.0001$ ) | 0.09<br>(0.0006)     | 0.30<br>( $<.0001$ ) | 0.27<br>( $<.0001$ ) | 0.19<br>( $<.0001$ ) | 0.26<br>( $<.0001$ ) | 0.30<br>( $<.0001$ ) |

Diabetes Questionnaire scales: GenW: General Wellbeing; MoE: Mood and Energy; FreW: Free of Worries about blood sugar; ManD: Capabilities to Manage your Diabetes; DiEx: Diet and Exercise; NLD: Not Limited by Diabetes; NLBS: Not Limited by Blood Sugar; SuO: Support from Others; SuDC: Support from Diabetes Care; AcDC: Access to Diabetes Care; CoDC: Continuity in Diabetes Care; MDMT: Medical Devices and Medical Treatment.

SF-36v2 domains: PF: physical functioning; RP: role-physical; BP: bodily pain; GH: general health; VT: vitality; SF: social functioning; RE: role-emotional; MH: mental health.



Svedbo Engström et al. A new diabetes questionnaire to add patients' perspectives to diabetes care for adults with type 1 and type 2 diabetes – A nationwide cross-sectional study of associations with generic health-related quality of life and clinical variables

**Table S6.** Spearman's rank correlations with p-values between the Diabetes Questionnaire scales and the SF-36v2 domains in type 2 diabetes

| Diabetes Questionnaire scale | SF-36v2 domain       |                      |                      |                      |                      |                      |                      |                      |
|------------------------------|----------------------|----------------------|----------------------|----------------------|----------------------|----------------------|----------------------|----------------------|
|                              | PF                   | RP                   | BP                   | GH                   | VT                   | RF                   | SF                   | MH                   |
| GenW                         | 0.39<br>( $<.0001$ ) | 0.44<br>( $<.0001$ ) | 0.48<br>( $<.0001$ ) | 0.56<br>( $<.0001$ ) | 0.60<br>( $<.0001$ ) | 0.44<br>( $<.0001$ ) | 0.51<br>( $<.0001$ ) | 0.53<br>( $<.0001$ ) |
| MoE                          | 0.41<br>( $<.0001$ ) | 0.45<br>( $<.0001$ ) | 0.42<br>( $<.0001$ ) | 0.57<br>( $<.0001$ ) | 0.58<br>( $<.0001$ ) | 0.51<br>( $<.0001$ ) | 0.54<br>( $<.0001$ ) | 0.60<br>( $<.0001$ ) |
| FreW                         | 0.28<br>( $<.0001$ ) | 0.35<br>( $<.0001$ ) | 0.34<br>( $<.0001$ ) | 0.47<br>( $<.0001$ ) | 0.42<br>( $<.0001$ ) | 0.38<br>( $<.0001$ ) | 0.40<br>( $<.0001$ ) | 0.43<br>( $<.0001$ ) |
| ManD                         | 0.26<br>( $<.0001$ ) | 0.32<br>( $<.0001$ ) | 0.28<br>( $<.0001$ ) | 0.44<br>( $<.0001$ ) | 0.45<br>( $<.0001$ ) | 0.34<br>( $<.0001$ ) | 0.37<br>( $<.0001$ ) | 0.42<br>( $<.0001$ ) |
| DiEx                         | 0.32<br>( $<.0001$ ) | 0.33<br>( $<.0001$ ) | 0.36<br>( $<.0001$ ) | 0.48<br>( $<.0001$ ) | 0.51<br>( $<.0001$ ) | 0.30<br>( $<.0001$ ) | 0.36<br>( $<.0001$ ) | 0.38<br>( $<.0001$ ) |
| NLD                          | 0.38<br>( $<.0001$ ) | 0.44<br>( $<.0001$ ) | 0.34<br>( $<.0001$ ) | 0.46<br>( $<.0001$ ) | 0.43<br>( $<.0001$ ) | 0.45<br>( $<.0001$ ) | 0.47<br>( $<.0001$ ) | 0.43<br>( $<.0001$ ) |
| NLBS                         | 0.34<br>( $<.0001$ ) | 0.40<br>( $<.0001$ ) | 0.31<br>( $<.0001$ ) | 0.40<br>( $<.0001$ ) | 0.38<br>( $<.0001$ ) | 0.44<br>( $<.0001$ ) | 0.46<br>( $<.0001$ ) | 0.42<br>( $<.0001$ ) |
| SuO                          | 0.14<br>(0.0001)     | 0.19<br>( $<.0001$ ) | 0.25<br>( $<.0001$ ) | 0.31<br>( $<.0001$ ) | 0.32<br>( $<.0001$ ) | 0.20<br>( $<.0001$ ) | 0.26<br>( $<.0001$ ) | 0.32<br>( $<.0001$ ) |
| SuDC                         | 0.14<br>( $<.0001$ ) | 0.21<br>( $<.0001$ ) | 0.21<br>( $<.0001$ ) | 0.26<br>( $<.0001$ ) | 0.25<br>( $<.0001$ ) | 0.21<br>( $<.0001$ ) | 0.26<br>( $<.0001$ ) | 0.28<br>( $<.0001$ ) |
| AcDC                         | 0.22<br>( $<.0001$ ) | 0.26<br>( $<.0001$ ) | 0.28<br>( $<.0001$ ) | 0.32<br>( $<.0001$ ) | 0.31<br>( $<.0001$ ) | 0.26<br>( $<.0001$ ) | 0.29<br>( $<.0001$ ) | 0.32<br>( $<.0001$ ) |
| CoDC                         | 0.07<br>(0.0130)     | 0.10<br>(0.0006)     | 0.11<br>(0.0001)     | 0.16<br>( $<.0001$ ) | 0.13<br>( $<.0001$ ) | 0.11<br>(0.0002)     | 0.13<br>( $<.0001$ ) | 0.14<br>( $<.0001$ ) |
| MDMT                         | 0.13<br>( $<.0001$ ) | 0.20<br>( $<.0001$ ) | 0.18<br>( $<.0001$ ) | 0.24<br>( $<.0001$ ) | 0.24<br>( $<.0001$ ) | 0.22<br>( $<.0001$ ) | 0.26<br>( $<.0001$ ) | 0.28<br>( $<.0001$ ) |

Diabetes Questionnaire scales: GenW: General Wellbeing; MoE: Mood and Energy; FreW: Free of Worries about blood sugar; ManD: Capabilities to Manage your Diabetes; DiEx: Diet and Exercise; NLD: Not Limited by Diabetes; NLBS: Not Limited by Blood Sugar; SuO: Support from Others; SuDC: Support from Diabetes Care; AcDC: Access to Diabetes Care; CoDC: Continuity in Diabetes Care; MDMT: Medical Devices and Medical Treatment.

SF-36v2 domains: PF: physical functioning; RP: role-physical; BP: bodily pain; GH: general health; VT: vitality; SF: social functioning; RE: role-emotional; MH: mental health.

Svedbo Engström et al. A new diabetes questionnaire to add patients' perspectives to diabetes care for adults with type 1 and type 2 diabetes – A nationwide cross-sectional study of associations with generic health-related quality of life and clinical variables

**Table S7.** Least square mean estimates and 95% confidence intervals for the Diabetes Questionnaire scales in three glycated haemoglobin (HbA<sub>1c</sub>) groups for type 1 and type 2 diabetes

| Diabetes Questionnaire scale | Type 1 diabetes                   |                                     |                                   |                                   |                                     |                                   | Type 2 diabetes                   |                                     |                                   |                                   |                                     |                                   |
|------------------------------|-----------------------------------|-------------------------------------|-----------------------------------|-----------------------------------|-------------------------------------|-----------------------------------|-----------------------------------|-------------------------------------|-----------------------------------|-----------------------------------|-------------------------------------|-----------------------------------|
|                              | Unadjusted analysis               |                                     |                                   | Adjusted analysis                 |                                     |                                   | Unadjusted analysis               |                                     |                                   | Adjusted analysis                 |                                     |                                   |
|                              | HbA <sub>1c</sub> <52<br>mmol/mol | HbA <sub>1c</sub> 52-69<br>mmol/mol | HbA <sub>1c</sub> ≥70<br>mmol/mol | HbA <sub>1c</sub> <52<br>mmol/mol | HbA <sub>1c</sub> 52-69<br>mmol/mol | HbA <sub>1c</sub> ≥70<br>mmol/mol | HbA <sub>1c</sub> <52<br>mmol/mol | HbA <sub>1c</sub> 52-69<br>mmol/mol | HbA <sub>1c</sub> ≥70<br>mmol/mol | HbA <sub>1c</sub> <52<br>mmol/mol | HbA <sub>1c</sub> 52-69<br>mmol/mol | HbA <sub>1c</sub> ≥70<br>mmol/mol |
| GenW                         | 64.33<br>(63.46-65.20)            | 59.27<br>(58.74-59.79)              | 56.34<br>(55.49-57.19)            | 51.11<br>(49.14-53.07)            | 47.23<br>(45.44-49.01)              | 45.66<br>(43.80-47.53)            | 65.97<br>(65.41-66.54)            | 62.92<br>(62.24-63.60)              | 54.26<br>(52.90-55.62)            | 63.63<br>(62.10-65.15)            | 62.81<br>(61.29-64.32)              | 56.81<br>(54.85-58.78)            |
| MoE                          | 67.15<br>(66.29-68.01)            | 65.14<br>(64.62-65.66)              | 58.32<br>(57.48-59.16)            | 57.77<br>(55.87-59.66)            | 56.14<br>(54.41-57.86)              | 49.75<br>(47.96-51.54)            | 79.24<br>(78.74-79.74)            | 72.75<br>(72.15-73.35)              | 61.02<br>(59.80-62.25)            | 77.12<br>(75.78-78.46)            | 72.23<br>(70.91-73.56)              | 60.73<br>(58.99-62.46)            |
| FreW                         | 58.21<br>(57.41-59.01)            | 56.09<br>(55.61-56.58)              | 48.72<br>(47.96-49.49)            | 55.28<br>(53.51-57.05)            | 52.22<br>(50.61-53.82)              | 46.09<br>(44.42-47.75)            | 73.07<br>(72.57-73.57)            | 66.72<br>(66.12-67.32)              | 54.82<br>(53.62-56.03)            | 70.39<br>(69.03-71.75)            | 65.51<br>(64.16-66.86)              | 54.66<br>(52.90-56.42)            |
| ManD                         | 70.05<br>(69.33-70.78)            | 63.88<br>(63.45-64.32)              | 55.09<br>(54.40-55.79)            | 64.84<br>(63.20-66.47)            | 59.71<br>(58.23-61.19)              | 51.49<br>(49.95-53.03)            | 74.12<br>(73.67-74.56)            | 67.74<br>(67.20-68.28)              | 60.35<br>(59.26-61.43)            | 71.53<br>(70.33-72.74)            | 66.65<br>(65.46-67.85)              | 60.07<br>(58.51-61.63)            |
| DiEx                         | 63.95<br>(63.07-64.84)            | 56.52<br>(55.98-57.06)              | 50.18<br>(49.32-51.04)            | 54.44<br>(52.50-56.37)            | 50.59<br>(48.83-52.35)              | 45.40<br>(43.57-47.23)            | 62.48<br>(61.92-63.03)            | 55.86<br>(55.20-56.52)              | 50.13<br>(48.80-51.47)            | 57.97<br>(56.54-59.40)            | 55.31<br>(53.91-56.72)              | 52.85<br>(51.02-54.68)            |
| NLD                          | 76.79<br>(75.93-77.66)            | 76.59<br>(76.07-77.11)              | 70.75<br>(69.92-71.58)            | 68.78<br>(66.84-70.71)            | 70.09<br>(68.33-71.85)              | 64.26<br>(62.44-66.09)            | 87.94<br>(87.46-88.43)            | 81.82<br>(81.23-82.40)              | 71.54<br>(70.37-72.71)            | 83.17<br>(81.79-84.55)            | 78.57<br>(77.21-79.94)              | 69.61<br>(67.83-71.38)            |
| NLBS                         | 74.54<br>(73.54-75.54)            | 70.33<br>(69.73-70.93)              | 64.60<br>(63.63-65.58)            | 64.39<br>(62.08-66.69)            | 61.14<br>(59.05-63.23)              | 57.16<br>(54.98-59.33)            | 85.59<br>(84.98-86.20)            | 77.91<br>(77.18-78.64)              | 65.85<br>(64.37-67.33)            | 81.69<br>(79.96-83.43)            | 75.53<br>(73.81-77.25)              | 65.42<br>(63.19-67.65)            |
| SuO                          | 66.33<br>(65.31-67.35)            | 61.93<br>(61.32-62.54)              | 59.61<br>(58.63-60.59)            | 63.01<br>(60.74-65.28)            | 59.84<br>(57.79-61.88)              | 58.00<br>(55.86-60.14)            | 68.56<br>(67.83-69.29)            | 65.70<br>(64.89-66.51)              | 57.12<br>(55.49-58.74)            | 68.47<br>(66.77-70.16)            | 66.84<br>(65.20-68.48)              | 57.40<br>(55.25-59.56)            |
| SuDC                         | 79.87<br>(79.13-80.61)            | 79.34<br>(78.89-79.79)              | 74.41<br>(73.70-75.13)            | 77.71<br>(76.01-79.41)            | 77.27<br>(75.73-78.81)              | 73.04<br>(71.44-74.64)            | 80.06<br>(79.54-80.58)            | 76.49<br>(75.87-77.11)              | 70.89<br>(69.64-72.14)            | 77.76<br>(76.38-79.14)            | 75.23<br>(73.86-76.59)              | 72.46<br>(70.69-74.24)            |
| AcDC                         | 69.08<br>(68.32-69.84)            | 68.52<br>(68.06-68.98)              | 64.78<br>(64.05-65.51)            | 64.69<br>(62.96-66.42)            | 64.90<br>(63.33-66.47)              | 62.54<br>(60.91-64.17)            | 73.64<br>(73.12-74.16)            | 69.68<br>(69.06-70.30)              | 64.39<br>(63.14-65.64)            | 70.33<br>(68.92-71.75)            | 68.12<br>(66.72-69.52)              | 65.20<br>(63.37-67.02)            |

Svedbo Engström et al. A new diabetes questionnaire to add patients' perspectives to diabetes care for adults with type 1 and type 2 diabetes – A nationwide cross-sectional study of associations with generic health-related quality of life and clinical variables

| Diabetes Questionnaire scale | Type 1 diabetes                   |                                     |                                   |                                   |                                     |                                   | Type 2 diabetes                   |                                     |                                   |                                   |                                     |                                   |
|------------------------------|-----------------------------------|-------------------------------------|-----------------------------------|-----------------------------------|-------------------------------------|-----------------------------------|-----------------------------------|-------------------------------------|-----------------------------------|-----------------------------------|-------------------------------------|-----------------------------------|
|                              | Unadjusted analysis               |                                     |                                   | Adjusted analysis                 |                                     |                                   | Unadjusted analysis               |                                     |                                   | Adjusted analysis                 |                                     |                                   |
|                              | HbA <sub>1c</sub> <52<br>mmol/mol | HbA <sub>1c</sub> 52-69<br>mmol/mol | HbA <sub>1c</sub> ≥70<br>mmol/mol | HbA <sub>1c</sub> <52<br>mmol/mol | HbA <sub>1c</sub> 52-69<br>mmol/mol | HbA <sub>1c</sub> ≥70<br>mmol/mol | HbA <sub>1c</sub> <52<br>mmol/mol | HbA <sub>1c</sub> 52-69<br>mmol/mol | HbA <sub>1c</sub> ≥70<br>mmol/mol | HbA <sub>1c</sub> <52<br>mmol/mol | HbA <sub>1c</sub> 52-69<br>mmol/mol | HbA <sub>1c</sub> ≥70<br>mmol/mol |
| CoDC                         | 78.03<br>(77.13-78.92)            | 80.76<br>(80.22-81.29)              | 80.05<br>(79.20-80.90)            | 74.89<br>(72.88-76.90)            | 77.58<br>(75.75-79.41)              | 76.08<br>(74.18-77.97)            | 72.45<br>(71.77-73.12)            | 70.90<br>(70.11-71.70)              | 67.72<br>(66.11-69.33)            | 72.22<br>(70.34-74.09)            | 70.45<br>(68.59-72.31)              | 68.43<br>(66.01-70.84)            |
| MDMT                         | 77.14<br>(76.34-77.94)            | 75.78<br>(75.30-76.26)              | 72.81<br>(72.04-73.58)            | 72.21<br>(70.41-74.01)            | 71.74<br>(70.11-73.38)              | 70.14<br>(68.45-71.84)            | 82.46<br>(82.02-82.90)            | 78.80<br>(78.29-79.31)              | 76.45<br>(75.41-77.48)            | 81.42<br>(80.23-82.62)            | 78.79<br>(77.62-79.96)              | 76.64<br>(75.11-78.17)            |

**Table S7 continued.** GenW: General Wellbeing; MoE: Mood and Energy; FreW: Free of Worries about blood sugar; ManD: Capabilities to Manage your Diabetes; DiEx: Diet and Exercise; NLD: Not Limited by Diabetes; NLBS: Not Limited by Blood Sugar; SuO: Support from Others; SuDC: Support from Diabetes Care; AcDC: Access to Diabetes Care; CoDC: Continuity in Diabetes Care; MDMT: Medical Devices and Medical Treatment

# Reporting checklist for cross sectional study.

Based on the STROBE cross sectional guidelines.

## Instructions to authors

Complete this checklist by entering the page numbers from your manuscript where readers will find each of the items listed below.

Your article may not currently address all the items on the checklist. Please modify your text to include the missing information. If you are certain that an item does not apply, please write "n/a" and provide a short explanation.

Upload your completed checklist as an extra file when you submit to a journal.

In your methods section, say that you used the STROBE cross sectional reporting guidelines, and cite them as:

von Elm E, Altman DG, Egger M, Pocock SJ, Gotsche PC, Vandenbroucke JP. The Strengthening the Reporting of Observational Studies in Epidemiology (STROBE) Statement: guidelines for reporting observational studies.

|  | Reporting Item                                                                                               | Page Number |
|--|--------------------------------------------------------------------------------------------------------------|-------------|
|  | <b>Title and abstract</b>                                                                                    |             |
|  | Title <a href="#">#1a</a> Indicate the study's design with a commonly used term in the title or the abstract | 1           |

|    |                      |                     |                                                |     |
|----|----------------------|---------------------|------------------------------------------------|-----|
| 1  | Abstract             | <a href="#">#1b</a> | Provide in the abstract an informative and     | 2   |
| 2  |                      |                     |                                                |     |
| 3  |                      |                     |                                                |     |
| 4  |                      |                     | balanced summary of what was done and          |     |
| 5  |                      |                     |                                                |     |
| 6  |                      |                     | what was found                                 |     |
| 7  |                      |                     |                                                |     |
| 8  |                      |                     |                                                |     |
| 9  | <b>Introduction</b>  |                     |                                                |     |
| 10 |                      |                     |                                                |     |
| 11 |                      |                     |                                                |     |
| 12 | Background /         | <a href="#">#2</a>  | Explain the scientific background and          | 4-5 |
| 13 |                      |                     |                                                |     |
| 14 | rationale            |                     | rationale for the investigation being reported |     |
| 15 |                      |                     |                                                |     |
| 16 |                      |                     |                                                |     |
| 17 | Objectives           | <a href="#">#3</a>  | State specific objectives, including any       | 5   |
| 18 |                      |                     |                                                |     |
| 19 |                      |                     | prespecified hypotheses                        |     |
| 20 |                      |                     |                                                |     |
| 21 |                      |                     |                                                |     |
| 22 | <b>Methods</b>       |                     |                                                |     |
| 23 |                      |                     |                                                |     |
| 24 |                      |                     |                                                |     |
| 25 |                      |                     |                                                |     |
| 26 | Study design         | <a href="#">#4</a>  | Present key elements of study design early in  | 5   |
| 27 |                      |                     |                                                |     |
| 28 |                      |                     | the paper                                      |     |
| 29 |                      |                     |                                                |     |
| 30 |                      |                     |                                                |     |
| 31 | Setting              | <a href="#">#5</a>  | Describe the setting, locations, and relevant  | 5   |
| 32 |                      |                     |                                                |     |
| 33 |                      |                     | dates, including periods of recruitment,       |     |
| 34 |                      |                     |                                                |     |
| 35 |                      |                     | exposure, follow-up, and data collection       |     |
| 36 |                      |                     |                                                |     |
| 37 |                      |                     |                                                |     |
| 38 |                      |                     |                                                |     |
| 39 | Eligibility criteria | <a href="#">#6a</a> | Give the eligibility criteria, and the sources | 5   |
| 40 |                      |                     |                                                |     |
| 41 |                      |                     | and methods of selection of participants.      |     |
| 42 |                      |                     |                                                |     |
| 43 |                      |                     |                                                |     |
| 44 |                      | <a href="#">#7</a>  | Clearly define all outcomes, exposures,        | 5-8 |
| 45 |                      |                     |                                                |     |
| 46 |                      |                     | predictors, potential confounders, and effect  |     |
| 47 |                      |                     |                                                |     |
| 48 |                      |                     | modifiers. Give diagnostic criteria, if        |     |
| 49 |                      |                     |                                                |     |
| 50 |                      |                     | applicable                                     |     |
| 51 |                      |                     |                                                |     |
| 52 |                      |                     |                                                |     |
| 53 |                      |                     |                                                |     |
| 54 | Data sources /       | <a href="#">#8</a>  | For each variable of interest give sources of  | 5-7 |
| 55 |                      |                     |                                                |     |
| 56 | measurement          |                     | data and details of methods of assessment      |     |
| 57 |                      |                     |                                                |     |
| 58 |                      |                     |                                                |     |
| 59 |                      |                     |                                                |     |
| 60 |                      |                     |                                                |     |

(measurement). Describe comparability of assessment methods if there is more than one group. Give information separately for exposed and unexposed groups if applicable.

|    |                        |                      |                                                                                                                               |
|----|------------------------|----------------------|-------------------------------------------------------------------------------------------------------------------------------|
| 1  |                        |                      |                                                                                                                               |
| 2  |                        |                      |                                                                                                                               |
| 3  |                        |                      |                                                                                                                               |
| 4  |                        |                      |                                                                                                                               |
| 5  |                        |                      |                                                                                                                               |
| 6  |                        |                      |                                                                                                                               |
| 7  |                        |                      |                                                                                                                               |
| 8  |                        |                      |                                                                                                                               |
| 9  |                        |                      |                                                                                                                               |
| 10 | Bias                   | <a href="#">#9</a>   | Describe any efforts to address potential sources of bias                                                                     |
| 11 |                        |                      |                                                                                                                               |
| 12 |                        |                      |                                                                                                                               |
| 13 |                        |                      |                                                                                                                               |
| 14 |                        |                      |                                                                                                                               |
| 15 | Study size             | <a href="#">#10</a>  | Explain how the study size was arrived at                                                                                     |
| 16 |                        |                      |                                                                                                                               |
| 17 |                        |                      |                                                                                                                               |
| 18 | Quantitative variables | <a href="#">#11</a>  | Explain how quantitative variables were handled in the analyses. If applicable, describe which groupings were chosen, and why |
| 19 |                        |                      |                                                                                                                               |
| 20 |                        |                      |                                                                                                                               |
| 21 |                        |                      |                                                                                                                               |
| 22 |                        |                      |                                                                                                                               |
| 23 |                        |                      |                                                                                                                               |
| 24 |                        |                      |                                                                                                                               |
| 25 |                        |                      |                                                                                                                               |
| 26 |                        |                      |                                                                                                                               |
| 27 |                        |                      |                                                                                                                               |
| 28 | Statistical methods    | <a href="#">#12a</a> | Describe all statistical methods, including those used to control for confounding                                             |
| 29 |                        |                      |                                                                                                                               |
| 30 |                        |                      |                                                                                                                               |
| 31 |                        |                      |                                                                                                                               |
| 32 |                        |                      |                                                                                                                               |
| 33 |                        |                      |                                                                                                                               |
| 34 | Statistical methods    | <a href="#">#12b</a> | Describe any methods used to examine subgroups and interactions                                                               |
| 35 |                        |                      |                                                                                                                               |
| 36 |                        |                      |                                                                                                                               |
| 37 |                        |                      |                                                                                                                               |
| 38 |                        |                      |                                                                                                                               |
| 39 | Statistical methods    | <a href="#">#12c</a> | Explain how missing data were addressed                                                                                       |
| 40 |                        |                      |                                                                                                                               |
| 41 |                        |                      |                                                                                                                               |
| 42 |                        |                      |                                                                                                                               |
| 43 |                        |                      |                                                                                                                               |
| 44 | Statistical methods    | <a href="#">#12d</a> | If applicable, describe analytical methods taking account of sampling strategy                                                |
| 45 |                        |                      |                                                                                                                               |
| 46 |                        |                      |                                                                                                                               |
| 47 |                        |                      |                                                                                                                               |
| 48 |                        |                      |                                                                                                                               |
| 49 |                        |                      |                                                                                                                               |
| 50 | Statistical methods    | <a href="#">#12e</a> | Describe any sensitivity analyses                                                                                             |
| 51 |                        |                      |                                                                                                                               |
| 52 |                        |                      |                                                                                                                               |
| 53 |                        |                      |                                                                                                                               |
| 54 |                        |                      |                                                                                                                               |
| 55 | <b>Results</b>         |                      |                                                                                                                               |
| 56 |                        |                      |                                                                                                                               |
| 57 |                        |                      |                                                                                                                               |
| 58 |                        |                      |                                                                                                                               |
| 59 |                        |                      |                                                                                                                               |
| 60 |                        |                      |                                                                                                                               |

|    |                  |                      |                                                |                            |
|----|------------------|----------------------|------------------------------------------------|----------------------------|
| 1  | Participants     | <a href="#">#13a</a> | Report numbers of individuals at each stage    | 5                          |
| 2  |                  |                      |                                                |                            |
| 3  |                  |                      | of study—eg numbers potentially eligible,      |                            |
| 4  |                  |                      | examined for eligibility, confirmed eligible,  |                            |
| 5  |                  |                      | included in the study, completing follow-up,   |                            |
| 6  |                  |                      | and analysed. Give information separately for  |                            |
| 7  |                  |                      | for exposed and unexposed groups if            |                            |
| 8  |                  |                      | applicable.                                    |                            |
| 9  |                  |                      |                                                |                            |
| 10 |                  |                      |                                                |                            |
| 11 | Participants     | <a href="#">#13b</a> | Give reasons for non-participation at each     | n/a With reference to      |
| 12 |                  |                      | stage                                          | ethical guidelines we did  |
| 13 |                  |                      |                                                | not ask potential          |
| 14 |                  |                      |                                                | participants to give their |
| 15 |                  |                      |                                                | reasons for non-           |
| 16 |                  |                      |                                                | participation.             |
| 17 |                  |                      |                                                |                            |
| 18 |                  |                      |                                                |                            |
| 19 |                  |                      |                                                |                            |
| 20 |                  |                      |                                                |                            |
| 21 |                  |                      |                                                |                            |
| 22 |                  |                      |                                                |                            |
| 23 |                  |                      |                                                |                            |
| 24 |                  |                      |                                                |                            |
| 25 |                  |                      |                                                |                            |
| 26 |                  |                      |                                                |                            |
| 27 |                  |                      |                                                |                            |
| 28 |                  |                      |                                                |                            |
| 29 |                  |                      |                                                |                            |
| 30 |                  |                      |                                                |                            |
| 31 |                  |                      |                                                |                            |
| 32 | Participants     | <a href="#">#13c</a> | Consider use of a flow diagram                 | n/a                        |
| 33 |                  |                      |                                                |                            |
| 34 |                  |                      |                                                |                            |
| 35 | Descriptive data | <a href="#">#14a</a> | Give characteristics of study participants (eg | 9-11                       |
| 36 |                  |                      | demographic, clinical, social) and information |                            |
| 37 |                  |                      | on exposures and potential confounders.        |                            |
| 38 |                  |                      | Give information separately for exposed and    |                            |
| 39 |                  |                      | unexposed groups if applicable.                |                            |
| 40 |                  |                      |                                                |                            |
| 41 |                  |                      |                                                |                            |
| 42 |                  |                      |                                                |                            |
| 43 |                  |                      |                                                |                            |
| 44 |                  |                      |                                                |                            |
| 45 |                  |                      |                                                |                            |
| 46 |                  |                      |                                                |                            |
| 47 | Descriptive data | <a href="#">#14b</a> | Indicate number of participants with missing   | 8                          |
| 48 |                  |                      | data for each variable of interest             |                            |
| 49 |                  |                      |                                                |                            |
| 50 |                  |                      |                                                |                            |
| 51 |                  |                      |                                                |                            |
| 52 |                  |                      |                                                |                            |
| 53 | Outcome data     | <a href="#">#15</a>  | Report numbers of outcome events or            | 9                          |
| 54 |                  |                      | summary measures. Give information             |                            |
| 55 |                  |                      |                                                |                            |
| 56 |                  |                      |                                                |                            |
| 57 |                  |                      |                                                |                            |
| 58 |                  |                      |                                                |                            |
| 59 |                  |                      |                                                |                            |
| 60 |                  |                      |                                                |                            |



1 separately for exposed and unexposed

2 groups if applicable.

|    |                   |                                                                     |               |
|----|-------------------|---------------------------------------------------------------------|---------------|
| 3  |                   |                                                                     |               |
| 4  |                   |                                                                     |               |
| 5  |                   |                                                                     |               |
| 6  | Main results      | <a href="#">#16a</a> Give unadjusted estimates and, if applicable,  | 7-8,13-14     |
| 7  |                   |                                                                     |               |
| 8  |                   | confounder-adjusted estimates and their                             |               |
| 9  |                   |                                                                     |               |
| 10 |                   | precision (eg, 95% confidence interval). Make                       |               |
| 11 |                   |                                                                     |               |
| 12 |                   | clear which confounders were adjusted for                           |               |
| 13 |                   |                                                                     |               |
| 14 |                   | and why they were included                                          |               |
| 15 |                   |                                                                     |               |
| 16 |                   |                                                                     |               |
| 17 |                   |                                                                     |               |
| 18 | Main results      | <a href="#">#16b</a> Report category boundaries when continuous     | 7,10-11,13-14 |
| 19 |                   |                                                                     |               |
| 20 |                   | variables were categorized                                          |               |
| 21 |                   |                                                                     |               |
| 22 |                   |                                                                     |               |
| 23 | Main results      | <a href="#">#16c</a> If relevant, consider translating estimates of | n/a           |
| 24 |                   |                                                                     |               |
| 25 |                   | relative risk into absolute risk for a meaningful                   |               |
| 26 |                   |                                                                     |               |
| 27 |                   | time period                                                         |               |
| 28 |                   |                                                                     |               |
| 29 |                   |                                                                     |               |
| 30 |                   |                                                                     |               |
| 31 | Other analyses    | <a href="#">#17</a> Report other analyses done—e.g., analyses       | 9,12-13       |
| 32 |                   |                                                                     |               |
| 33 |                   | of subgroups and interactions, and sensitivity                      |               |
| 34 |                   |                                                                     |               |
| 35 |                   | analyses                                                            |               |
| 36 |                   |                                                                     |               |
| 37 |                   |                                                                     |               |
| 38 | <b>Discussion</b> |                                                                     |               |
| 39 |                   |                                                                     |               |
| 40 |                   |                                                                     |               |
| 41 |                   |                                                                     |               |
| 42 | Key results       | <a href="#">#18</a> Summarise key results with reference to         | 14            |
| 43 |                   |                                                                     |               |
| 44 |                   | study objectives                                                    |               |
| 45 |                   |                                                                     |               |
| 46 |                   |                                                                     |               |
| 47 | Limitations       | <a href="#">#19</a> Discuss limitations of the study, taking into   | 16            |
| 48 |                   |                                                                     |               |
| 49 |                   | account sources of potential bias or                                |               |
| 50 |                   |                                                                     |               |
| 51 |                   | imprecision. Discuss both direction and                             |               |
| 52 |                   |                                                                     |               |
| 53 |                   | magnitude of any potential bias.                                    |               |
| 54 |                   |                                                                     |               |
| 55 |                   |                                                                     |               |
| 56 |                   |                                                                     |               |
| 57 |                   |                                                                     |               |
| 58 |                   |                                                                     |               |
| 59 |                   |                                                                     |               |
| 60 |                   |                                                                     |               |

|    |                    |                     |                                                   |       |
|----|--------------------|---------------------|---------------------------------------------------|-------|
| 1  | Interpretation     | <a href="#">#20</a> | Give a cautious overall interpretation            | 15-17 |
| 2  |                    |                     |                                                   |       |
| 3  |                    |                     | considering objectives, limitations, multiplicity |       |
| 4  |                    |                     | of analyses, results from similar studies, and    |       |
| 5  |                    |                     | other relevant evidence.                          |       |
| 6  |                    |                     |                                                   |       |
| 7  |                    |                     |                                                   |       |
| 8  |                    |                     |                                                   |       |
| 9  |                    |                     |                                                   |       |
| 10 |                    |                     |                                                   |       |
| 11 | Generalisability   | <a href="#">#21</a> | Discuss the generalisability (external validity)  | 16    |
| 12 |                    |                     | of the study results                              |       |
| 13 |                    |                     |                                                   |       |
| 14 |                    |                     |                                                   |       |
| 15 |                    |                     |                                                   |       |
| 16 | <b>Other</b>       |                     |                                                   |       |
| 17 |                    |                     |                                                   |       |
| 18 | <b>Information</b> |                     |                                                   |       |
| 19 |                    |                     |                                                   |       |
| 20 |                    |                     |                                                   |       |
| 21 |                    |                     |                                                   |       |
| 22 | Funding            | <a href="#">#22</a> | Give the source of funding and the role of the    | 18-19 |
| 23 |                    |                     | funders for the present study and, if             |       |
| 24 |                    |                     | applicable, for the original study on which the   |       |
| 25 |                    |                     | present article is based                          |       |
| 26 |                    |                     |                                                   |       |
| 27 |                    |                     |                                                   |       |
| 28 |                    |                     |                                                   |       |
| 29 |                    |                     |                                                   |       |
| 30 |                    |                     |                                                   |       |

#### Notes:

- 13b: n/a With reference to ethical guidelines we did not ask potential participants to give their reasons for non-participation.
- 16b: 7,10-11,13-14 The STROBE checklist is distributed under the terms of the Creative Commons Attribution License CC-BY. This checklist was completed on 27. March 2020 using <https://www.goodreports.org/>, a tool made by the [EQUATOR Network](#) in collaboration with [Penelope.ai](#)

# BMJ Open

**New diabetes questionnaire to add patients' perspectives to diabetes care for adults with type 1 and type 2 diabetes – Nationwide cross-sectional study of construct validity assessing associations with generic health-related quality of life and clinical variables**

|                                 |                                                                                                                                                                                                                                                                                                                                                                                                                                                                                                                                                                                                                                                                                                                                                                                                                                                                                                                                                                                                                                                                                                                                                                                                                                      |
|---------------------------------|--------------------------------------------------------------------------------------------------------------------------------------------------------------------------------------------------------------------------------------------------------------------------------------------------------------------------------------------------------------------------------------------------------------------------------------------------------------------------------------------------------------------------------------------------------------------------------------------------------------------------------------------------------------------------------------------------------------------------------------------------------------------------------------------------------------------------------------------------------------------------------------------------------------------------------------------------------------------------------------------------------------------------------------------------------------------------------------------------------------------------------------------------------------------------------------------------------------------------------------|
| Journal:                        | <i>BMJ Open</i>                                                                                                                                                                                                                                                                                                                                                                                                                                                                                                                                                                                                                                                                                                                                                                                                                                                                                                                                                                                                                                                                                                                                                                                                                      |
| Manuscript ID                   | bmjopen-2020-038966.R1                                                                                                                                                                                                                                                                                                                                                                                                                                                                                                                                                                                                                                                                                                                                                                                                                                                                                                                                                                                                                                                                                                                                                                                                               |
| Article Type:                   | Original research                                                                                                                                                                                                                                                                                                                                                                                                                                                                                                                                                                                                                                                                                                                                                                                                                                                                                                                                                                                                                                                                                                                                                                                                                    |
| Date Submitted by the Author:   | 13-Jul-2020                                                                                                                                                                                                                                                                                                                                                                                                                                                                                                                                                                                                                                                                                                                                                                                                                                                                                                                                                                                                                                                                                                                                                                                                                          |
| Complete List of Authors:       | Svedbo Engström, Maria; Dalarna University School of Education Health and Social Studies; University of Gothenburg Sahlgrenska Academy, Department of Molecular and Clinical Medicine, Institute of Medicine<br>Leksell, Janeth; Dalarna University, School of Education, Health and Social Studies; Uppsala University, Clinical Diabetology and Metabolism, Department of Medical Sciences<br>Johansson, Unn-Britt; Sophiahemmet University College; Karolinska Institutet, Department of Clinical Sciences and Education, Södersjukhuset<br>Borg, Sixten; Lund University, Department of Clinical Sciences in Malmö, Health Economics Unit, Medicon Village, Lund<br>Palaszewski, Bo; Västra Götalandsregionen, Department of Data Management and Analysis<br>Franzén, Stefan; Västra Götalandsregionen, Register Center Västra Götaland<br>Gudbjörnsdottir, Soffia; University of Gothenburg Sahlgrenska Academy, Department of Molecular and Clinical Medicine, Institute of Medicine; Västra Götalandsregionen, Register Center Västra Götaland<br>Eeg-Olofsson, Katarina; University of Gothenburg Sahlgrenska Academy, Department of Molecular and Clinical Medicine, Institute of Medicine; Sahlgrenska University Hospital |
| <b>Primary Subject Heading</b>: | Diabetes and endocrinology                                                                                                                                                                                                                                                                                                                                                                                                                                                                                                                                                                                                                                                                                                                                                                                                                                                                                                                                                                                                                                                                                                                                                                                                           |
| Secondary Subject Heading:      | Health services research                                                                                                                                                                                                                                                                                                                                                                                                                                                                                                                                                                                                                                                                                                                                                                                                                                                                                                                                                                                                                                                                                                                                                                                                             |
| Keywords:                       | General diabetes < DIABETES & ENDOCRINOLOGY, Clinical audit < HEALTH SERVICES ADMINISTRATION & MANAGEMENT, Quality in health care < HEALTH SERVICES ADMINISTRATION & MANAGEMENT                                                                                                                                                                                                                                                                                                                                                                                                                                                                                                                                                                                                                                                                                                                                                                                                                                                                                                                                                                                                                                                      |
|                                 |                                                                                                                                                                                                                                                                                                                                                                                                                                                                                                                                                                                                                                                                                                                                                                                                                                                                                                                                                                                                                                                                                                                                                                                                                                      |

1  
2  
3  
4  
5  
6  
7  
8  
9  
10  
11  
12  
13  
14  
15  
16  
17  
18  
19  
20  
21  
22  
23  
24  
25  
26  
27  
28  
29  
30  
31  
32  
33  
34  
35  
36  
37  
38  
39  
40  
41  
42  
43  
44  
45  
46  
47  
48  
49  
50  
51  
52  
53  
54  
55  
56  
57  
58  
59  
60

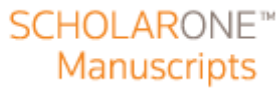



I, the Submitting Author has the right to grant and does grant on behalf of all authors of the Work (as defined in the below author licence), an exclusive licence and/or a non-exclusive licence for contributions from authors who are: i) UK Crown employees; ii) where BMJ has agreed a CC-BY licence shall apply, and/or iii) in accordance with the terms applicable for US Federal Government officers or employees acting as part of their official duties; on a worldwide, perpetual, irrevocable, royalty-free basis to BMJ Publishing Group Ltd ("BMJ") its licensees and where the relevant Journal is co-owned by BMJ to the co-owners of the Journal, to publish the Work in this journal and any other BMJ products and to exploit all rights, as set out in our [licence](#).

The Submitting Author accepts and understands that any supply made under these terms is made by BMJ to the Submitting Author unless you are acting as an employee on behalf of your employer or a postgraduate student of an affiliated institution which is paying any applicable article publishing charge ("APC") for Open Access articles. Where the Submitting Author wishes to make the Work available on an Open Access basis (and intends to pay the relevant APC), the terms of reuse of such Open Access shall be governed by a Creative Commons licence – details of these licences and which [Creative Commons](#) licence will apply to this Work are set out in our licence referred to above.

Other than as permitted in any relevant BMJ Author's Self Archiving Policies, I confirm this Work has not been accepted for publication elsewhere, is not being considered for publication elsewhere and does not duplicate material already published. I confirm all authors consent to publication of this Work and authorise the granting of this licence.

Svedbo Engström *et al.* Manuscript, revised version

**Title:**

New diabetes questionnaire to add patients' perspectives to diabetes care for adults with type 1 and type 2 diabetes – Nationwide cross-sectional study of construct validity assessing associations with generic health-related quality of life and clinical variables

**Authors:**

Maria Svedbo Engström<sup>a,b</sup>; Janeth Leksell<sup>b,c</sup>; Unn-Britt Johansson<sup>d,e</sup>; Sixten Borg<sup>f</sup>,  
Bo Palaszewski<sup>g</sup>; Stefan Franzén<sup>h</sup>; Soffia Gudbjörnsdóttir<sup>a,h</sup>; Katarina Eeg-Olofsson<sup>a,i</sup>

**Author affiliations:**

<sup>a</sup> Department of Molecular and Clinical Medicine, Institute of Medicine, Sahlgrenska Academy, University of Gothenburg, Gothenburg, Sweden

<sup>b</sup> Dalarna University, School of Education, Health and Social Studies, Falun, Sweden

<sup>c</sup> Uppsala University, Clinical Diabetology and Metabolism, Department of Medical Sciences, Uppsala, Sweden

<sup>d</sup> Sophiahemmet University, Stockholm, Sweden

<sup>e</sup> Karolinska Institutet, Department of Clinical Sciences and Education, Södersjukhuset, Stockholm, Sweden

<sup>f</sup> Lund University, Department of Clinical Sciences in Malmö, Health Economics Unit, Medicon Village, Lund, Sweden

<sup>g</sup> Region Västra Götaland, Department of Data Management and Analysis, Gothenburg, Sweden

<sup>h</sup> Register Center Västra Götaland, Gothenburg, Sweden

<sup>i</sup> Sahlgrenska University Hospital, Gothenburg, Sweden

**Corresponding author:**

Maria Svedbo Engström

Postal address: Dalarna University, School of Education, Health and Social Studies, SE-79188 Falun, Sweden

E-mail: [msd@du.se](mailto:msd@du.se)

Telephone: +46(0)70 191 86 05

**ORCID iDs:**

Borg: 0000-0001-6292-7002; Eeg-Olofsson: 0000-0002-3376-4707; Johansson: 0000-0003-3309-136X; Leksell: 0000-0001-8682-2045; Palaszewski: 0000-0002-4854-2701; Svedbo Engström: 0000-0002-8267-592X

**Word Count:** 4662

## Abstract

**Objectives:** To study evidence for construct validity, the aim was to describe the outcome from the recently developed Diabetes Questionnaire, assess the associations of that outcome with clinical variables and generic health-related quality of life, and study the sensitivity to differences between clinically relevant groups of glycaemic control in adults with type 1 and type 2 diabetes in a nationwide setting.

**Design:** Cross-sectional survey.

**Setting:** Swedish diabetes care clinics connected to the National Diabetes Register (NDR).

**Participants:** Among 2,479 adults with type 1 diabetes and 2,469 with type 2 diabetes selected at random from the NDR, 1373 (55.4%) with type 1 and 1353 (54.8%) with type 2 diabetes chose to participate.

**Outcome measures:** The Diabetes Questionnaire, the generic 36-item Short Form version 2 (SF-36v2) health survey and clinical variables.

**Results:** Related to the pre-specified assumptions, supporting evidence for construct validity for the Diabetes Questionnaire was found. Supporting divergent validity, the statistically significant correlations with the clinical variables were few and weak. In relation to the SF-36v2 and in support of convergent validity, the strongest correlations were seen in the Diabetes Questionnaire scales General Well-being and Mood and Energy. In those scales, machine learning analyses showed that about 40-45% of the variance was explained by the SF-36v2 results and clinical variables. In multiple regression analyses among three groups with differing levels of HbA<sub>1c</sub> adjusted for demographics, other risk factors, and diabetes complications, the high-risk group had, in support of sensitivity to clinically relevant groups, statistically significant lower scores than the well-controlled group in most Diabetes Questionnaire scales.

**Conclusions:** This nation-wide study shows that the Diabetes Questionnaire captures some generic health-related quality-of-life dimensions, in addition to adding diabetes-specific information not covered by the SF-36v2 and clinical variables. The Diabetes Questionnaire is also sensitive to differences between clinically relevant groups of glycaemic control.

**Keywords:** Diabetes Mellitus, Type 1; Diabetes Mellitus, Type 2; Patient-reported outcome; Cross-Sectional Study; Construct validity

## Article Summary

### Strengths and limitations of this study

- The cross-sectional study used a large, heterogeneous nationwide sample of adults with type 1 diabetes and adults with type 2 diabetes selected at random.
- Respondents were representative of the 2015 population in the Swedish National Diabetes Register.
- The Diabetes Questionnaire scales scores were related to relevant clinical variables and a well-known and often recommended measure of generic health-related quality of life.
- The analyses were limited to the respondents and might reflect a group with greater motivation for participation.
- The questionnaires were only offered in Swedish.



**Main text:****INTRODUCTION**

Everyday life with diabetes as an adult is a complex challenge. Diabetes makes individuals responsible for self-management to avoid serious short-term and long-term complications, while balancing self-perceived health and well-being in the present as well as in the future.[1-6] To support skills for self-management is a central task of diabetes care, and the individual patient's prerequisites, wishes, and available evidence must be taken into account.[1, 4-6] An important step for the Swedish National Diabetes Register (NDR) has therefore been to broaden health-care provider perspectives and enable a systematic collection of adults' perspectives of living with diabetes and their experiences of whether they are offered adequate support from diabetes care.[7-10] The newly developed Diabetes Questionnaire is intended to support meetings with individuals and provide a means for quality improvement at the local, regional, and national levels.[7-9]

The Diabetes Questionnaire was developed from interviews with adults with type 1 or type 2 diabetes that identified a broad range of aspects important to the target group, such as well-being, impact on daily life, capabilities to manage diabetes, and support from diabetes care.[9] In line with Sen's capability approach,[11, 12] the Diabetes Questionnaire focuses on the individual's opportunities, prerequisites, and possible barriers to live a good life with diabetes.[7-9] Supporting evidence for content validity, face validity, and ease of items understandability and answerability has been presented.[8, 9] In addition, supporting evidence for test-retest reliability and that the scales can be used for comparison between men and women, between different age groups, and, for most scales, between type 1 and type 2 diabetes have been provided.[7, 8] Furthermore, the scales can detect differences between clinically relevant subgroups, such as diabetes type, diabetes treatment, age group, and gender.[7] We have also begun to study the associations with clinical variables by showing low individual-level correlations with glycated haemoglobin (HbA<sub>1c</sub>), systolic blood pressure (SBP), and LDL cholesterol.[7]

This study adds to previous work and reports on an extended analysis of the evidence for construct validity. Construct validity concerns the confidence that a questionnaire captures the construct it was intended to measure[13]. It is a measurement property that involves a complex process using a variety of techniques studying differences between relevant groups and pre-specified assumptions of logical relationships to scores of a range of other measures

1  
2  
3 and patient characteristics[13, 14]. The assumptions can postulate which aspects are expected  
4 to be related to each other, presenting evidence for convergent validity, and which aspects are  
5 expected to be relatively unrelated, supporting evidence for divergent, also known as  
6 discriminant, validity[13] For this work, we chose to focus on differences between subgroups  
7 of glycaemic control as measured by HbA<sub>1c</sub> and the relations to clinical variables relevant for  
8 diabetes care and an often-recommended generic measure of health-related quality of life, the  
9 36-item Short Form (SF-36v2) health survey. To study evidence for construct validity, the  
10 aim was to describe the outcome from the Diabetes Questionnaire, to assess the associations  
11 of that outcome with clinical variables and generic health-related quality of life, and to study  
12 the sensitivity to differences between clinically relevant groups of glycaemic control in adults  
13 with type 1 and type 2 diabetes in a nationwide setting.  
14  
15  
16  
17  
18  
19  
20  
21  
22  
23

## 24 **METHODS**

### 25 **Sample and data-collection**

26  
27 In this cross-sectional survey, 2,479 adults with type 1 diabetes and 2,469 with type 2 diabetes  
28 were selected at random without replacement from the Swedish NDR. Eligibility criteria were  
29 being alive, 18-80 years of age, and recorded in the NDR during the period from September  
30 30<sup>th</sup> 2014 to October 1<sup>st</sup> 2015 with at least one recorded test of HbA<sub>1c</sub> level during the  
31 previous 12 months. With these criteria, 29,245 adults with type 1 diabetes at hospital out-  
32 patient clinics and 208,852 adults with type 2 diabetes at primary health care centres were  
33 eligible for recruitment. In the data collection phase, we aimed at a sample size allowing for  
34 subgroup analyses.  
35  
36  
37  
38  
39  
40  
41  
42

43 The Diabetes Questionnaire, the SF-36v2 survey, and a prepaid return envelope were sent by  
44 mail in October 2015 to survey selectees and again to non-respondents after 30 days.[7, 15]  
45 Both questionnaires were answered by 1,373 (55.4%) individuals with type 1 diabetes and  
46 1,353 (54.8%) with type 2 diabetes[15]. With small differences in response rate depending on  
47 the questionnaires in question, the sample has been described as previously focusing on the  
48 scale development of the Diabetes Questionnaire[7] and separate analyses of the SF-36v2  
49 data[15]. Age, sex, and clinical variables (diabetes type defined by clinical diagnosis, diabetes  
50 duration, HbA<sub>1c</sub> level, cardiovascular risk factors, complications, physical activity level, and  
51 receipt of medical treatment) recorded because of their relevance to high-quality diabetes care  
52 were collected from the NDR.  
53  
54  
55  
56  
57  
58  
59  
60

## Diabetes Questionnaire

The Diabetes Questionnaire is a 33-item self-reporting questionnaire having a total of 12 scales divided into 2 main parts.[7, 8] Part 1 has 22 items on 8 scales and acts as a patient-reported outcome measure (PROM). These scales are General Wellbeing (GenW), Mood and Energy (MoE), Free of Worries about blood sugar (FreW), Capabilities to Manage your Diabetes (ManD), Diet and Exercise (DiEx), Not Limited by Diabetes (NLD), Not Limited by Blood Sugar (NLBS), and Support from Others (SuO). Part 2 is an 11-item patient-reported experience measure (PREM) with 4 scales. Those scales are Support from Diabetes Care (SuDC), Access to Diabetes Care (AcDC), Continuity in Diabetes Care (CoDC), and Medical Devices and Medical Treatment (MDMT). All scales are scored from 0 to 100, with higher scores representing the more desirable outcome. The scales ManD, NLBS, and MDMT are specific to diabetes type.[7]

## SF-36v2 survey

The SF-36v2 survey is a self-reporting questionnaire for generic health-related quality of life with support for its validity and reliability in overall populations, such as people with diabetes.[3, 16-20] We used the self-administered standard form in Swedish and software from QualityMetric Inc. The eight domains produced are physical functioning (PF); role-physical (RP), that is role limitations due to physical health problems; bodily pain (BP); general health (GH); vitality (VT); social functioning (SF); role-emotional (RE), that is role limitations due to mental health problems; and mental health (MH). The domains are scored from 0 to 100. Higher scores indicate a better general health-related quality of life.[16, 17]

## Pre-specified assumptions

As the Diabetes Questionnaire is intended to measure patient perspectives on how they feel, how their diabetes treatment is going, and their experiences of support from diabetes care, the pre-specified assumptions for correlations with clinical variables and the SF-36v2 were as follows:

- Based on clinical experience, it was proposed that, in support of divergent validity, a small number of negative and weak correlations would be found between the Diabetes Questionnaire scales and the clinical variables, mostly related to the HbA<sub>1c</sub> level. There would be no correlations with SBP and LDL cholesterol.
- Based on examinations of the content in the two questionnaires, it was proposed that in support of convergent validity, the Diabetes Questionnaire PROM scales GenW,

1  
2  
3 MoE, FreW, ManD, DiEx, NLD, and NLBS would have more and stronger  
4 correlations to the SF-36v2 domains, as compared to the PROM scale SuO and the  
5 PREM scales (SuDC, AcDC, CoDC, and MDMT). Observed correlations would be  
6 positive, with the strongest in GenW and MoE. In support of divergent validity strong  
7 correlations were not expected across the other scales. Correlations  $\geq 0.60$  were  
8 considered as very strong, 0.50 to  $<0.60$  as strong, 0.40 to  $<0.50$  as moderate, and  
9  $<0.40$  as weak.  
10  
11  
12  
13  
14  
15  
16

### 17 **Statistical Analysis**

18 The data for participants with type 1 and type 2 diabetes were analysed separately. The  
19 descriptive statistics for each variable are based on non-missing observations. The continuous  
20 variables are given as means and standard deviations for normal distributions and as medians  
21 and interquartile ranges for skewed distributions. The categorical variables are presented as  
22 numbers and percentages. The generation of scale scores from the Diabetes Questionnaire is  
23 described in detail elsewhere.[7] The SF-36v2 domain scores were generated using the  
24 manual and licensed software from QualityMetric.[17]  
25  
26  
27  
28  
29  
30  
31

32 In relation to the pre-specified assumptions, Spearman's rank correlation was used to study  
33 the monoton associations between the Diabetes Questionnaire scale scores and the clinical  
34 variables age, diabetes duration, HbA<sub>1c</sub> level, body mass index (BMI), LDL cholesterol, and  
35 SBP, as well as between the scores from the Diabetes Questionnaire scales and the SF-36v2  
36 domains. To broaden the analysis, machine learning using random forests was conducted to  
37 investigate non-linear associations between the Diabetes Questionnaire scales and the  
38 SF-36v2 domains together with clinical variables (age, sex, diabetes duration, HbA<sub>1c</sub> level,  
39 BMI, LDL cholesterol, and SBP). Random forest is a general tree-based regression and  
40 classification method that uses bootstrapping to create a large number of regressions of  
41 classification trees that are combined to produce a model prediction.[21] The use of a large  
42 number of trees allows the model to depict non-linear associations without the need to  
43 prespecify these in a model, while at the same time guarding against overfit.[21] First, the  
44 variance in all Diabetes Questionnaire scales was examined in relation to the SF-36v2  
45 domains and the clinical variables together. Next, the variable importance of the SF-36v2  
46 domains and the clinical variables as predictors of the PROM scales GenW and MoE were  
47 examined. We also examined the percent variance in HbA<sub>1c</sub> explained by another clinical  
48  
49  
50  
51  
52  
53  
54  
55  
56  
57  
58  
59  
60

variable, the Diabetes Questionnaire scales, and the SF-36v2 domains together. The results are given as percent of the total variance. Each model contained 1000 trees.

To study the sensitivity of the Diabetes Questionnaire scales to clinically relevant groups of glycaemic control, group-level associations between the Diabetes Questionnaire scales and glycaemic control as measured by HbA<sub>1c</sub>, unadjusted and adjusted multiple regression analyses were conducted in the same manner as previously described for the SF-36v2 data.[15] HbA<sub>1c</sub> was considered as a categorical variable divided into three clinically relevant groups corresponding to differing levels of glycaemic control and consequently differing levels of the risk of diabetes complications according to international and Swedish treatment guidelines.[4, 22] The three groups were well-controlled (<52 mmol/mol), sub-optimal (52-69 mmol/mol), and high-risk (≥70 mmol/mol). For the three HbA<sub>1c</sub> groups, the least square mean estimates and 95% confidence intervals were calculated for each scale. The scale observations were modelled with a linear model with fixed effects for the HbA<sub>1c</sub> group (exposure), age, sex, diabetes duration, BMI, SBP, LDL-cholesterol, micro- and macro-albuminuria, estimated glomerular filtration rate, retinopathy, smoking status, physical activity level, previous coronary heart disease, previous stroke, and receipt of antihypertensive and lipid lowering treatments. Missing data were imputed 10 times, using multiple chained equations. The analyses were performed separately for each imputed data set, and the results were subsequently combined using Rubin's rules. The results are presented as least square mean estimates with 95% confidence intervals.

The extent of missing data was 0% for age and sex, 7.2% for clinical variables (range 0-36.5%), 1.7% for the SF-36v2 domains (range 0-3.3% for individual dimensions), and 4.8% for the Diabetes Questionnaire scales (range 0.3-34.7% for individual scales). For the Diabetes Questionnaire, the higher extent of missing data is likely related to having "not applicable" as a response alternative in some scales, which at this stage was treated as missing data. For scales without "not applicable" as a response alternative, the range for missing data was 0.3-2.8%.

The standardized mean difference was used to examine the data balance between the HbA<sub>1c</sub> groups and the deviation from the means in the clinical and demographic data. A significance level of 5% was used throughout; no allowance was made for multiplicity of statistical tests. The analyses were conducted using SAS 9.4 and R 3.4.4.

## Patient and public involvement statement

The Diabetes Questionnaire was based on qualitative interviews with adults living with diabetes.[8, 9] Adults with diabetes and representatives from patient organizations participated in expert reviews during the development and initial testing.[8] Adults with diabetes were involved in the pre-testing phase by participating in cognitive interviews and being consulted to comment on questionnaire revisions.[8] The analyses presented here as the previous scale development and evaluation of reliability and validity relied on the contributions from those adults with diabetes who responded to the questionnaires.[7, 8] The Swedish Diabetes Foundation, the national patient organization, has expressed their support for the project.

## Ethical considerations

The study conforms to the Declaration of Helsinki and was approved by the Regional Ethical Review Board in Gothenburg, Sweden (No. 029-15, T600-15). Participants gave their informed consent. The letter to the participants contained information about the study's purpose, the voluntary nature of their participation, and their right to end participation. The letter also disclosed information about the NDR, methods of handling personal data, confidentiality measures, and contact details.

## RESULTS

Among respondents with type 1 diabetes, 50.3% were men. The averages of key statistics were 48.6 years for age, 24.7 years for diabetes duration, and 62 mmol/mol for HbA<sub>1c</sub> level. Among respondents with type 2 diabetes, 60.8% were men. Corresponding averages were 66.6 years for age, 9.4 years for diabetes duration, and 53 mmol/mol for HbA<sub>1c</sub> level (Table 1). The crude means and standard deviations for the Diabetes Questionnaire scales are given in Table S1. The clinical characteristics of non-respondents are given in Table S2.

**Table 1.** Clinical and demographic characteristics of the respondents separated by diabetes type and glycated haemoglobin (HbA<sub>1c</sub>) level

| Variable                              | Type 1 diabetes  |                                |                                  |                                |                                   | Type 2 diabetes |                                |                                  |                                |                                   |
|---------------------------------------|------------------|--------------------------------|----------------------------------|--------------------------------|-----------------------------------|-----------------|--------------------------------|----------------------------------|--------------------------------|-----------------------------------|
|                                       | All              | HbA <sub>1c</sub> <52 mmol/mol | HbA <sub>1c</sub> 52-69 mmol/mol | HbA <sub>1c</sub> ≥70 mmol/mol | Standardized mean difference, SMD | All             | HbA <sub>1c</sub> <52 mmol/mol | HbA <sub>1c</sub> 52-69 mmol/mol | HbA <sub>1c</sub> ≥70 mmol/mol | Standardized mean difference, SMD |
| Number (%)                            | 1373             | 284 (20.7%)                    | 781 (56.9%)                      | 308 (22.4%)                    |                                   | 1353            | 725 (53.6%)                    | 503 (37.2%)                      | 125 (9.2%)                     |                                   |
| Men, n (%)                            | 690 (50.3)       | 152 (53.5)                     | 391 (50.1)                       | 147 (47.7)                     | 0.077                             | 822 (60.8)      | 444 (61.2)                     | 302 (60.0)                       | 76 (60.8)                      | 0.016                             |
| Age, years (SD)                       | 48.6 (16.4)      | 46.9 (17.0)                    | 49.6 (16.1)                      | 47.8 (16.3)                    | 0.113                             | 66.6 (9.1)      | 66.5 (9.1)                     | 66.9 (9.0)                       | 65.5 (9.7)                     | 0.103                             |
| Diabetes duration, years (IQR)        | 22.0 (12.0-36.0) | 19.0 (7.0-32.0)                | 23.0 (13.0-37.0)                 | 24.0 (13.0-37.0)               | 0.150                             | 8.0 (4.0-14.0)  | 6.0 (3.0-11.0)                 | 10.0 (6.0-16.0)                  | 13.0 (6.0-17.0)                | 0.443                             |
| HbA <sub>1c</sub> mmol/mol (SD)       | 62 (12.7)        |                                |                                  |                                |                                   | 53 (12.5)       |                                |                                  |                                |                                   |
| BMI, kg/m <sup>2</sup> (SD)           | 26.0 (4.2)       | 25.2 (3.8)                     | 26.0 (4.2)                       | 26.7 (4.6)                     | 0.239                             | 29.9 (5.3)      | 29.3 (5.2)                     | 30.3 (5.4)                       | 32.0 (5.5)                     | 0.332                             |
| Systolic blood pressure, mmHg (SD)    | 127.0 (14.0)     | 124.8 (14.0)                   | 127.5 (13.8)                     | 127.8 (14.2)                   | 0.145                             | 134.3 (14.3)    | 134.0 (14.4)                   | 134.5 (13.7)                     | 135.1 (16.5)                   | 0.046                             |
| Antihypertensive medication, n (%)    | 589 (44.7)       | 99 (36.9)                      | 341 (45.3)                       | 149 (50.2)                     | 0.179                             | 1070 (80.1)     | 572 (79.6)                     | 404 (81.9)                       | 94 (76.4)                      | 0.091                             |
| LDL-cholesterol, mmol/L (SD)          | 2.4 (0.8)        | 2.5 (0.8)                      | 2.4 (0.8)                        | 2.5 (0.8)                      | 0.077                             | 2.5 (0.9)       | 2.5 (0.9)                      | 2.4 (0.9)                        | 2.5 (1.0)                      | 0.026                             |
| Lipid-lowering medication, n (%)      | 642 (48.4)       | 94 (34.6)                      | 378 (49.8)                       | 170 (57.6)                     | 0.315                             | 900 (68.1)      | 472 (66.6)                     | 344 (70.1)                       | 84 (69.4)                      | 0.050                             |
| Micro-albuminuria, n (%)              | 132 (10.3)       | 12 (4.6)                       | 70 (9.5)                         | 50 (17.6)                      | 0.285                             | 194 (18.0)      | 80 (13.9)                      | 83 (20.1)                        | 31 (34.1)                      | 0.323                             |
| Macro-albuminuria, n (%)              | 31 (2.6)         | 5 (2.1)                        | 12 (1.8)                         | 14 (5.2)                       | 0.126                             | 52 (5.0)        | 27 (4.8)                       | 20 (5.1)                         | 5 (6.1)                        | 0.037                             |
| Estimated Glomerular Filtration Rate, | 90.0 (23.5)      | 90.6 (20.7)                    | 89.1 (22.6)                      | 91.6 (27.7)                    | 0.071                             | 82.3 (23.5)     | 82.5 (22.3)                    | 81.9 (24.0)                      | 83.4 (27.9)                    | 0.038                             |



| Variable                              | Type 1 diabetes |                                |                                  |                                |                                   | Type 2 diabetes |                                |                                  |                                |                                   |
|---------------------------------------|-----------------|--------------------------------|----------------------------------|--------------------------------|-----------------------------------|-----------------|--------------------------------|----------------------------------|--------------------------------|-----------------------------------|
|                                       | All             | HbA <sub>1c</sub> <52 mmol/mol | HbA <sub>1c</sub> 52-69 mmol/mol | HbA <sub>1c</sub> ≥70 mmol/mol | Standardized mean difference, SMD | All             | HbA <sub>1c</sub> <52 mmol/mol | HbA <sub>1c</sub> 52-69 mmol/mol | HbA <sub>1c</sub> ≥70 mmol/mol | Standardized mean difference, SMD |
| eGFR, mL/min (SD)                     |                 |                                |                                  |                                |                                   |                 |                                |                                  |                                |                                   |
| Retinopathy, n (%)                    | 875 (65.9)      | 137 (50.6)                     | 520 (68.2)                       | 218 (74.1)                     | 0.333                             | 327 (29.4)      | 128 (21.7)                     | 153 (36.3)                       | 46 (47.0)                      | 0.366                             |
| Coronary heart disease, n (%)         | 83 (6.3)        | 9 (3.3)                        | 53 (7.0)                         | 21 (7.1)                       | 0.113                             | 279 (22.4)      | 136 (20.2)                     | 111 (24.0)                       | 32 (28.6)                      | 0.130                             |
| Stroke, n (%)                         | 48 (3.6)        | 5 (1.9)                        | 32 (4.2)                         | 11 (3.7)                       | 0.093                             | 96 (7.8)        | 48 (7.2)                       | 40 (8.9)                         | 8 (7.1)                        | 0.043                             |
| Smoker, n (%)                         | 135 (10.1)      | 14 (5.1)                       | 78 (10.2)                        | 43 (14.4)                      | 0.214                             | 162 (12.9)      | 79 (11.7)                      | 58 (12.3)                        | 25 (23.1)                      | 0.203                             |
| Physical activity, daily, n (%)       | 359 (27.6)      | 90 (33.5)                      | 203 (27.2)                       | 66 (23.2)                      | 0.334                             | 426 (34.9)      | 251 (38.7)                     | 157 (33.9)                       | 18 (16.7)                      | 0.410                             |
| <b>Diabetes treatment</b>             |                 |                                |                                  |                                | 0.136                             |                 |                                |                                  |                                | 0.813                             |
| Diet alone, n (%)                     |                 |                                |                                  |                                |                                   | 195 (14.4)      | 172 (23.7)                     | 19 (3.8)                         | 4 (3.3)                        |                                   |
| Oral hypoglycaemic agent alone, n (%) |                 |                                |                                  |                                |                                   | 718 (53.1)      | 419 (57.8)                     | 261 (52.0)                       | 38 (30.9)                      |                                   |
| Insulin alone, n (%)                  | 1335 (97.2)     | 271 (95.4)                     | 764 (97.8)                       | 300 (97.4)                     |                                   | 130 (9.6)       | 46 (6.3)                       | 63 (12.5)                        | 21 (17.1)                      |                                   |
| Insulin and oral agent, n (%)         | 32 (2.3)        | 9 (3.2)                        | 15 (1.9)                         | 8 (2.6)                        |                                   | 266 (19.7)      | 76 (10.5)                      | 140 (27.9)                       | 50 (40.7)                      |                                   |
| Insulin pump users, n (%)             | 356 (26.2)      | 66 (23.8)                      | 221 (28.5)                       | 69 (22.5)                      | 0.091                             | 2 (0.5)         | 1 (0.9)                        | 1 (0.5)                          | 0 (0.0)                        | 0.093                             |

The descriptive statistics are presented as the means and standard deviations (SD) for normally distributed continuous variables, the median and interquartile range (IQR) for skewed distributions, or number and percentages for categorical variables.



## **Monoton correlations related to the proposed assumptions between the Diabetes Questionnaire scale scores and the clinical variables**

In line with the assumptions and in support for divergent validity, there were few statistically significant monoton correlations between the Diabetes Questionnaire scales and the clinical variables. Observed correlations were weak, and most were negative. The results are shown as heat maps in Figs. S1-S2 with details provided in Tables S3-S4.

As assumed, the HbA<sub>1c</sub> level was the variable with most statistically significant correlations across the Diabetes Questionnaire scales. Statistically significant but weak correlations between having a lower and better HbA<sub>1c</sub> level and higher and better scores were seen in several Diabetes Questionnaire scales. For participants with type 1 diabetes, significant weak negative correlations (-0.12 to -0.25) were seen in the five Diabetes Questionnaire PROM scales GenW, FreW, ManD, DiEx, and NLBS. The strongest correlations were seen in ManD and DiEx. Among participants with type 2 diabetes, statistically significant but weak negative correlations (-0.13 to -0.24) were seen in the seven Diabetes Questionnaire PROM scales GenW, MoE, FreW, ManD, DiEx, NLD, and NLBS and in the two PREM scales SuDC and AcDC. The strongest correlations were seen in MoE, FreW, and ManD, with generally stronger correlations in the PROM scales than in the PREM scales (Figs. S1-S2, Tables S3-S4).

For age, statistically significant positive correlations showed that a higher age was weakly associated with higher and better scores in several Diabetes Questionnaire scales. For participants with type 1 diabetes, statistically significant weak positive correlations (0.11 to 0.19) were seen in the four PROM scales MoE, FreW, ManD, and DiEx, and in the two PREM scales AcDC and MDMT. The highest correlations were seen in MoE, FreW, and MDMT. Among participants with type 2 diabetes, statistically significant weak positive correlations (0.12 to 0.16) were seen in the six PROM scales GenW, MoE, FreW, ManD, and DiEx. The highest correlations were seen in MoE, FreW, and DiEx. For LDL cholesterol and SBP, the results came up to the expectations of no statistically significant correlations. However, for participants with type 1 diabetes, a statistically significant negative correlation showed that a lower SBP was weakly associated with better scores in MoE. A lower BMI showed statistically significant weak negative correlations with higher scores in DiEx in both diabetes types as with GenW and MoE in type 2 diabetes. For diabetes duration, statistically significant positive correlations showed that a longer duration was weakly associated with

1  
2  
3 higher scores in FreW and ManD for participants with type 1 diabetes. For those with type 2  
4 diabetes, statistically significant negative correlations showed that a longer duration was  
5 associated with lower scores in FreW and NLBS (Figs. S1-S2, Tables S3-S4).  
6  
7  
8  
9

### 10 **Monoton correlations related to the proposed assumptions between scores in the** 11 **Diabetes Questionnaire scales and the SF-36v2 domains**

12 In line with the assumptions and in support for convergent validity, the statistically significant  
13 monoton correlations between the Diabetes Questionnaire scales and the SF-36v2 domains  
14 were stronger in seven of the PROM scales as compared to the PROM scale SuO and the  
15 PREM scales. As expected, the observed statistically significant correlations were all positive,  
16 showing an association between higher scores in both questionnaires. The results are shown in  
17 Figs. 1-2 and Tables S5-S6.  
18  
19  
20  
21  
22  
23

24  
25 As assumed, the strongest correlations were seen in the Diabetes Questionnaire PROM scales  
26 GenW and MoE. Statistically significant positive correlations showed that higher scores in  
27 GenW and MoE were strongly associated with higher scores in about half of the SF-36v2  
28 domains. In GenW, statistically significant positive correlations were seen with the SF-36v2  
29 domains PF, GH, VT, and MH. The correlations were very strong with VT (0.60), strong with  
30 GH and MH (0.51 to 0.56), and weak with PF. Among those with type 2 diabetes, there were  
31 also statistically significant strong positive correlations between GenW and SF (0.51). In  
32 MoE, statistically significant positive correlations were seen with the SF-36v2 domains GH,  
33 VT, SF, and MH. The correlations were very strong with MH (0.60) and strong with GH, VT,  
34 and SF (0.51 to 0.58). Among those with type 2 diabetes, statistically significant strong  
35 positive correlations were also seen between MoE and RF (0.51). For both diabetes types,  
36 statistically significant strong positive correlations were also seen between the PROM scale  
37 DiEx and the VT domain (0.51). Statistically significant moderate positive correlations were  
38 also seen between the PROM scales and SF-36v2 domains. In NLD and NLBS, statistically  
39 significant moderate positive correlations were more common in type 2 diabetes than in  
40 type 1 diabetes. In support for divergent validity, the PROM scale SuO and the PREM scales,  
41 statistically significant correlations were weak (0.11 to 0.32) or absent (Figs. 1-2,  
42 Tables S5-S6).  
43  
44  
45  
46  
47  
48  
49  
50  
51  
52  
53  
54  
55  
56  
57  
58  
59  
60

### **Non-linear associations to clinical variables and SF-36v2 domains together**

The results from the machine learning analysis are shown in Figs. 3 and S3. Similar results were seen for type 1 and type 2 diabetes. Among the PROM scales, the variance was explained by the SF-36v2 domains together with the clinical variables to almost 40% in GenW and to around 45% in MoE. In FreW, ManD, DiEx, NLD, and NLBS, the variance was explained to about 25-30% and in SuO to about 10%. Among the PREM scales, SuDC, AcDC, and MDMT were explained to about 10% or below. In CoDC, almost no variance was explained (Fig. 3). As predictors of the Diabetes Questionnaire PROM scales GenW and MoE, the variables with the highest importance were the SF-36v2 domains GH, VT, and MH. LDL cholesterol and SBP had low variable importance (Fig. S3). The percent variance in HbA<sub>1c</sub> explained by other clinical variables, the SF-36v2 domains, and the Diabetes Questionnaire scales together was low, around 5% in type 1 diabetes and around 10% in type 2 diabetes. Consequently, the importance of the other clinical variables, the SF-36v2 domains, and the Diabetes Questionnaire scales as predictors of HbA<sub>1c</sub> was not examined.

### **Sensitivity of the Diabetes Questionnaire scales to clinically relevant groups of glycaemic control**

The results from the adjusted regression analyses of the Diabetes Questionnaire scales and the HbA<sub>1c</sub> groups are presented separately for participants with type 1 and type 2 diabetes in Fig. 4. The least square mean estimates and confidence intervals from the unadjusted and adjusted analyses are given in detail in Table S7.

Among those with type 1 diabetes, the adjusted analysis of the HbA<sub>1c</sub> groups showed significantly lower scores for the high-risk group than the well-controlled group in the eight PROM scales GenW, MoE, FreW, ManD, DiEx, NLD, NLBS, and SuO as in the PREM scale SuDC. The largest between-group differences were seen in the PROM scales ManD and DiEx, where the well-controlled group had the significantly highest means, followed by the sub-optimal group and the high-risk group. Among those with type 2 diabetes, the adjusted analysis showed that the high-risk group had significantly lower scores than the well-controlled group in all scales but CoDC. In the five PROM scales MoE, FreW, ManD, NLD, and NLBS, the well-controlled group had the significantly highest means, followed by the sub-optimal and high-risk groups. The largest between-group differences were seen in MoE, FreW, NLD, and NLBS (Fig. 4, Table S7).

## DISCUSSION

From a nationwide setting with a large sample of adults with type 1 and type 2 diabetes selected at random, we present the outcome from the Diabetes Questionnaire. To study construct validity, we assess convergent and divergent associations of that outcome with clinical variables and generic health-related quality of life, as measured by the SF-36v2 and assess the sensitivity to differences between clinically relevant groups of glycaemic control. We found supporting evidence for construct validity in both type 1 and type 2 diabetes. As expected, and in support for divergent validity, there were few statistically significant correlations with the clinical variables. The observed correlations were weak, and most were negative. Also as expected, and in support for convergent validity, the correlations with the SF-36v2 domains were positive; the strongest correlations were found in the Diabetes Questionnaire PROM scales GenW and MoE. Furthermore, either weak or no correlations were seen in the PREM scales, supporting divergent validity. In machine learning analyses, the SF-36v2 domains and the clinical variables together explained the variance in the PROM scales GenW and MoE to about 40-45%. In the other scales, the variance explained was low. In regression analyses among three groups with differing levels of HbA<sub>1c</sub> adjusted for demographics, other risk factors, and diabetes complications, the high-risk group had, in support of sensitivity to clinically relevant groups of glycaemic control, statistically significantly lower scores than the well-controlled group in most Diabetes Questionnaire scales for participants with type 1 diabetes and in almost all scales for those with type 2 diabetes. Statistically significant differences between all three groups of glycaemic control were seen in two scales for type 1 diabetes and in five scales for type 2 diabetes.

### Findings and implications

Evaluating the measurement qualities of a questionnaire is a complex and cumulative effort.[13, 14] In this study, we continue the evaluation of the Diabetes Questionnaire by addressing its construct validity. The results in relation to divergent validity show supporting evidence that the Diabetes Questionnaire targets different concepts than the clinical variables for diabetes care traditionally covered by the NDR. Thus, the central aspects covered by the Diabetes Questionnaire including patient perspectives on how they feel, how their diabetes treatment is going, or their experiences of support from diabetes care cannot be measured by HbA<sub>1c</sub> or other tested clinical variables. Nor can the clinical variables be estimated through the Diabetes Questionnaire. We need the combination. There is a growing emphasis that the perspectives of those living with diabetes should be part of clinical meetings and be given

1  
2  
3 priority among outcomes in diabetes care assessments.[1, 5, 6, 23-25] Supplementing  
4 decision-making by adding the patient's perspective is suggested to increase the focus on  
5 these aspects in clinical meetings[2, 26] and to enhance the quality of care.[26-28] In Sweden,  
6 the Patient Act strengthens the patient's position and possibilities for shared decision-making  
7 and states that the individual patient's prerequisites and wishes should be taken into  
8 account.[29] There is also a growing movement towards person-centred care aiming for  
9 partnership that is centred on the patient's experience and individual prerequisites, resources,  
10 and barriers. An important basis is the patient's story.[30] We hope that the Diabetes  
11 Questionnaire can support the patient story if used in the clinical meetings together with the  
12 clinical variables.  
13  
14  
15  
16  
17  
18  
19  
20  
21

22 The Diabetes Questionnaire is unique in being developed to support clinical meetings with  
23 individuals and to be used as a means for quality improvement through longitudinal  
24 assessment at a local, regional, and national levels within the frame of a nationwide healthcare  
25 quality register.[7-9] Many other questionnaires for diabetes were developed to target a  
26 specific aspect within intervention studies.[3, 18, 19] The Diabetes Questionnaire has a broad  
27 approach with aspects identified as important to adults with diabetes.[8, 9] The Diabetes  
28 Questionnaire is also developed using the vocabulary and phrasing of people with diabetes,[8]  
29 unlike many other questionnaires that often use academic or professional jargon. In this study,  
30 we found supporting evidence that the Diabetes Questionnaire is sensitive to statistically  
31 significant differences between clinically relevant subgroups with differing levels of  
32 glycaemic control. The Diabetes Questionnaire was also in support of convergent validity  
33 found to capture some aspects of generic health-related quality of life, while also in support of  
34 divergent validity adding aspects that are not covered by the often-recommended SF-36v2.  
35 For routine use within clinical diabetes care, the Diabetes Questionnaire is likely more  
36 relevant than the generic SF-36v2. A limitation of the Diabetes Questionnaire is, however,  
37 that it is currently only available in Swedish. Consequently, there is limited opportunity for  
38 international comparisons. The opportunities and barriers related to clinical use of the  
39 Diabetes Questionnaire are currently being studied from the perspectives of professionals and  
40 adults with diabetes.  
41  
42  
43  
44  
45  
46  
47  
48  
49  
50  
51  
52  
53  
54

### 55 **Strengths and weaknesses**

56 Among the strengths of this study are the large and heterogeneous sample of adults with  
57 type 1 and type 2 diabetes selected at random from the nationwide NDR. The respondents  
58  
59  
60

1  
2  
3 were representative of the 2015 population in the NDR (data on file). The results can be  
4 considered representative of the Swedish adult population with diabetes related to the  
5 coverage rate of about 90% in 2015 when around 40,000 adults with type 1 diabetes and  
6 347,000 with type 2 diabetes were registered in the NDR. Through the NDR, we had access to  
7 clinical variables relevant for diabetes care and background data for the non-respondents.  
8  
9 Another strength is the use of a well-known measure of health-related quality of life. As there  
10 is a lack of agreed-upon benchmarks for how strong positive correlations between  
11 questionnaires addressing subjective aspects should be to support convergent construct  
12 validity,[31, 32] this study based the division of the correlation strength on reports that such  
13 correlations generally are low,[31, 33] often within the range 0.20-0.40[33] or 0.40-0.60.[31]  
14 A correlation of 0.60 has been suggested to be extremely strong, as the random error of  
15 measurement of the two questionnaires impede perfect correlations.[31] As the Diabetes  
16 Questionnaire and the SF-36v2 do not measure the exact same construct, there were no  
17 prerequisites for broad strong correlations.[14, 31, 33]

18  
19 Our study also has limitations. The analyses were limited to the respondents and might reflect  
20 a group that is more motivated to participate. Another limitation is that the questionnaires  
21 were only offered in Swedish, potentially resulting in a higher proportion of foreign-born  
22 individuals among the non-responders than among the respondents. Furthermore, the cross-  
23 sectional design means that it is not possible to make causal conclusions.

### 34 35 36 37 38 39 **Future perspectives**

40 The evaluation of construct validity is a work of putting the pieces together.[13, 14]  
41 Consequently, more studies are needed to relate the Diabetes Questionnaire to different  
42 concepts and measures. An important task for diabetes care is to identify suitable  
43 interventions that adequately can support individuals with diabetes. The Diabetes  
44 Questionnaire can be an important contribution to identify the need and focus for targeted  
45 interventions, especially for adults with low scores. In future studies, it is important to  
46 evaluate the potential of using scores from the Diabetes Questionnaire scales as the primary  
47 selection base or in combination with, for example, HbA<sub>1c</sub> levels or BMI. It is also essential to  
48 evaluate whether the Diabetes Questionnaire scales are responsive to actual changes and can  
49 be used as an evaluative tool adding patient perspectives to both nursing and medical  
50 interventions, longitudinal assessments, and quality improvement. The NDR is established as  
51 a clinical and a national assessment tool in Swedish diabetes care.[4, 34-36] By now, the  
52  
53  
54  
55  
56  
57  
58  
59  
60



1  
2  
3 Diabetes Questionnaire is digitally and freely available for use by all clinics in Sweden  
4 connected to the NDR. The Diabetes Questionnaire is also included as the basis for  
5 developmental quality indicators in the Swedish national guidelines for diabetes care.[4] In  
6  
7 the future, the Diabetes Questionnaire can be amongst the established quality indicators  
8  
9 bringing patient perspectives to the fore for diabetes care.  
10  
11  
12

### 13 **Conclusion**

14  
15 This nationwide study shows that the Diabetes Questionnaire captures some generic health-  
16 related quality of life dimensions as well as adds diabetes-specific information not covered by  
17 the SF-36v2 and clinical variables. The Diabetes Questionnaire is also sensitive to differences  
18 between clinically relevant groups of glycaemic control.  
19  
20  
21  
22

### 23 **List of abbreviations**

24 Abbreviations related to the Diabetes Questionnaire

25 GenW: General Well-being

26 MoE: Mood and Energy

27 FreW: Free of Worries about blood sugar

28 ManD: Capabilities to Manage your Diabetes

29 DiEx: Diet and Exercise

30 NLD: Not Limited by Diabetes

31 NLBS: Not Limited by Blood Sugar

32 SuO: Support from Others

33 SuDC: Support from Diabetes Care

34 AcDC: Access to Diabetes Care

35 CoDC: Continuity in Diabetes Care

36 MDMT: Medical Devices and Medical Treatment

37 PREM: Patient-reported experience measure

38 PROM: Patient-reported outcome measure

39  
40  
41 Abbreviations related to the SF-36v2 survey

42 PF: Physical functioning

43 RP: Role-physical

44 BP: Bodily pain

45 GH: General health  
46  
47  
48  
49  
50  
51  
52  
53  
54  
55  
56  
57  
58  
59  
60

1  
2  
3 VT: Vitality

4 SF: Social functioning

5  
6 RE: Role-emotional

7  
8 MH: Mental health  
9

## 10 11 **Acknowledgements**

12  
13 The authors wish to thank Ebba Linder for facilitating data collection, Mervete Miftaraj for  
14 data management, and Ann-Marie Svensson for intellectual advice and support during the  
15 processes of design and ethical approval. Parts of the presented data have been published in  
16 an abstract and were presented at the Annual Meeting of the European Association for the  
17 Study of Diabetes (EASD) in 2019 and within a doctoral thesis at Gothenburg university,  
18 Sweden, in 2019.  
19  
20  
21  
22  
23  
24

## 25 **Competing interests**

26  
27 Dr. Eeg-Olofsson reports grants from the ALF agreement (ALFGBG 698991), during the  
28 conduct of the study; personal fees from Abbott, personal fees from Lilly, personal fees from  
29 Novo Nordisk, personal fees from Bayer, outside the submitted work; Dr. Gudbjörnsdottir  
30 reports grants from the ALF-agreement (ALFGBG 725311), during the conduct of the study;  
31 grants and personal fees from AstraZeneca, grants and personal fees from Boehringer  
32 Ingelheim, grants and personal fees from Eli Lilly, grants and personal fees from Merck Sharp  
33 & Dohme, grants and personal fees from Novo Nordisk, grants and personal fees from Sanofi,  
34 outside the submitted work; the other authors declare that they have nothing to disclose.  
35  
36  
37  
38  
39  
40  
41  
42

## 43 **Funding**

44 This work was supported by Dalarna University, Falun; Uppsala University, Uppsala; the  
45 Sahlgrenska University Hospital, Gothenburg; the Swedish Diabetes Foundation; and the  
46 Sophiahemmet Foundation, Stockholm. Unrestricted grants were provided by Astra Zeneca,  
47 MSD, Novo Nordisk, and the Swedish state under the agreement between the Swedish  
48 government and the county councils, the ALF-agreement (Nos. ALFGBG-725311 and  
49 ALFGBG-698991). None of the funding providers have influenced the design of the study;  
50 the collection, analysis, or interpretation of data; the writing of the manuscript, or any  
51 publication decision at any stage.  
52  
53  
54  
55  
56  
57  
58  
59  
60



## Author Contributions

MSE made substantial contributions to the design of the work, applying for ethical approval and funding, interpreting the data, and drafting and revising the manuscript (major contributor). JL and UBJ supervised and made substantial contributions to the design of the work, applied for funding, made intellectual contributions in the interpretation of the data, critically revised the manuscript for important intellectual content, and contributed experience and knowledge from diabetes care and research in diabetes and health-related quality of life. SB made substantial contributions to the design of the work, made intellectual contributions in the interpretation of the data, and critically revised the manuscript for important intellectual content. BP made substantial contributions to the design of the work; performed the selection of the random sample; made intellectual contributions in the interpretation of the data; critically revised the manuscript for important intellectual content, and contributed statistical advice, experience, and knowledge in the research of generic health-related quality of life and patient-reported outcome. SF made substantial contributions to the design of the work, contributed substantial statistical advice, was the major contributor in analysing the data, made substantial intellectual contributions in the interpretation of the data, and critically revised the manuscript for important intellectual content. SG supervised and made substantial contributions to the design of the work; applied for ethical approval and funding; made intellectual contributions in interpretation of the data; critically revised the manuscript for important intellectual content, and contributed medical experience and knowledge from diabetes care, diabetes research, and research using health-care quality registers. KEO supervised and made substantial contributions to the design of the work; applied for ethical approval and funding; generated the SF-36v2 data; interpreted the data; critically revised the manuscript for important intellectual content, and contributed medical experience and knowledge from diabetes care, diabetes research, and research using health-care quality registers. All authors read and approved the final manuscript as well as consented to be on the author list.

## Data sharing statement

The data that support the findings of this study are not publicly available. The study presented here has been subject to review by an ethical board and approved for publication related to the specific aim of our research project. With reference to the European General Data Protection Regulation, the data are personal and therefore confidential.

## REFERENCES

1. Young-Hyman D, de Groot M, Hill-Briggs F, Gonzalez JS, Hood K, Peyrot M. Psychosocial Care for People With Diabetes: A Position Statement of the American Diabetes Association. *Diabetes Care*. 2016;39(12):2126-40. doi: 10.2337/dc16-2053.
2. Polonsky WH. Emotional and quality-of-life aspects of diabetes management. *Curr Diab Rep*. 2002;2(2):153-9.
3. Speight J, Reaney, M. D. & Barnard, K. D. Not all roads lead to Rome—a review of quality of life measurement in adults with diabetes. *Diabetic Medicine*. 2009;26:315–27. doi: DOI: 10.1111/j.1464-5491.2009.02682.x.
4. National Board of Health and Welfare (Socialstyrelsen). National guidelines for diabetes care. [In Swedish]. *Nationella riktlinjer för diabetesvård: Stöd för styrning och ledning*. www.socialstyrelsen.se; 2018 October. Report No.: 2018-10-25. [Cited 2019 October 16]. Available from: <https://www.socialstyrelsen.se/regler-och-riktlinjer/nationella-riktlinjer/slutliga-riktlinjer/diabetes/>
5. American Diabetes Association. 4. Comprehensive Medical Evaluation and Assessment of Comorbidities: Standards of Medical Care in Diabetes-2020. *Diabetes Care*. 2020;43(Suppl 1):S37-S47. doi: 10.2337/dc20-S004.
6. American Diabetes Association. 5. Facilitating Behavior Change and Well-being to Improve Health Outcomes: Standards of Medical Care in Diabetes-2020. *Diabetes Care*. 2020;43(Suppl 1):S48-S65. doi: 10.2337/dc20-S005.
7. Borg S, Eeg-Olofsson K, Palaszewski B, Svedbo Engstrom M, Gerdtham UG, Gudbjörnsdottir S. Patient-reported outcome and experience measures for diabetes: development of scale models, differences between patient groups and relationships with cardiovascular and diabetes complication risk factors, in a combined registry and survey study in Sweden. *BMJ Open*. 2019;9(1):e025033. doi: 10.1136/bmjopen-2018-025033.
8. Svedbo Engstrom M, Leksell J, Johansson U-B, Eeg-Olofsson K, Borg S, Palaszewski B, et al. A disease-specific questionnaire for measuring patient-reported outcomes and experiences in the Swedish National Diabetes Register: Development and evaluation of content validity, face validity, and test-retest reliability. *Patient Educ Couns*. 2018;101(1):139-46. doi: 10.1016/j.pec.2017.07.016.
9. Svedbo Engström M, Leksell J, Johansson U-B, Gudbjörnsdottir S. What is important for you? A qualitative interview study of living with diabetes and experiences of diabetes care to establish a basis for a tailored Patient-Reported Outcome Measure for the Swedish National Diabetes Register. *BMJ Open*. 2016;6(3):e010249. doi: 10.1136/bmjopen-2015-010249.
10. Borg S, Palaszewski B, Gerdtham UG, Fredrik O, Roos P, Gudbjörnsdottir S. Patient-reported outcome measures and risk factors in a quality registry: a basis for more patient-centered diabetes care in Sweden. *Int J Environ Res Public Health*. 2014;11(12):12223-46. doi: 10.3390/ijerph111212223.
11. Robeyns I. Sen's capability approach and gender inequality: selecting relevant capabilities. *Feminist Economics*. 2003;9 (2-3):61-92. doi: 10.1080/1354570022000078024.
12. Sen AK, Nussbaum MC. *The quality of life*. Oxford: Clarendon Press; 1993.
13. Fayers PM, Machin D. *Quality of life: the assessment, analysis, and reporting of patient-reported outcomes*. Third ed. Chichester, West Sussex, UK; Hoboken, NJ: John Wiley & Sons Inc.; 2016.
14. Mokkink LB, Terwee CB, Patrick DL, Alonso J, Stratford PW, Knol DL, et al. The COSMIN study reached international consensus on taxonomy, terminology, and definitions of measurement properties for health-related patient-reported outcomes. *J Clin Epidemiol*. 2010;63(7):737-45. doi: 10.1016/j.jclinepi.2010.02.006.
15. Svedbo Engström M, Leksell J, Johansson U-B, Borg S, Palaszewski B, Franzén S, et al. Health-related quality of life and glycaemic control among adults with type 1 and type 2

- 1  
2  
3 diabetes – a nationwide cross-sectional study. *Health and Quality of Life Outcomes*.  
4 2019;17(141):1-11. doi: 10.1186/s12955-019-1212-z.
- 5 16. Ware JE, Jr. SF-36 health survey update. *Spine*. 2000;25(24):3130-9.
- 6 17. Maruish ME, editor. User's manual for the SF-36v2 Health Survey. 3rd ed. ed: Lincoln,  
7 RI: QualityMetric Incorporated; 2011.
- 8 18. Fitzpatrick R, Bowling A, Gibbons E, Haywood K, Jenkinson C, Mackintosh A, et al. A  
9 structured review of patient-reported measures in relation to selected chronic conditions,  
10 perceptions of quality of care and carer impact National Centre for Health Outcomes  
11 Development (Oxford site): Unit of Health-Care Epidemiology, Department of Public Health,  
12 University of Oxford; 2006. Available from: <http://phi.uhce.ox.ac.uk/>
- 13 19. Gibbons E, Fitzpatrick R, Patient Reported Outcome Measurement Group. A structured  
14 review of patient-reported outcome measures (PROMs) for diabetes. University of Oxford  
15 2009.
- 16 20. Norris SL, McNally TK, Zhang X, Burda B, Chan B, Chowdhury FM, et al. Published  
17 norms underestimate the health-related quality of life among persons with type 2 diabetes. *J*  
18 *Clin Epidemiol*. 2011;64(4):358-65. doi: 10.1016/j.jclinepi.2010.04.016.
- 19 21. Breiman L. Random Forests. *Machine Learning*. 2001;45(1):5-32. doi:  
20 10.1023/a:1010933404324.
- 21 22. American Diabetes A. 6. Glycemic Targets: Standards of Medical Care in Diabetes-2020.  
22 *Diabetes Care*. 2020;43(Suppl 1):S66-S76. doi: 10.2337/dc20-S006.
- 23 23. Jones A, Vallis M, Pouwer F. If it does not significantly change HbA1c levels why should  
24 we waste time on it? A plea for the prioritization of psychological well-being in people with  
25 diabetes. *Diabet Med*. 2015;32(2):155-63. doi: 10.1111/dme.12620.
- 26 24. Glasgow RE, Peeples M, Skovlund SE. Where is the patient in diabetes performance  
27 measures? The case for including patient-centered and self-management measures. *Diabetes*  
28 *Care*. 2008;31(5):1046-50. doi: 10.2337/dc07-1845.
- 29 25. IDF Clinical Guidelines Task Force. Global Guideline for Type 2 Diabetes:  
30 recommendations for standard, comprehensive, and minimal care. *Diabet Med*.  
31 2006;23(6):579-93. doi: 10.1111/j.1464-5491.2006.01918.x.
- 32 26. Kotronoulas G, Kearney N, Maguire R, Harrow A, Di Domenico D, Croy S, et al. What is  
33 the value of the routine use of patient-reported outcome measures toward improvement of  
34 patient outcomes, processes of care, and health service outcomes in cancer care? A systematic  
35 review of controlled trials. *J Clin Oncol*. 2014;32(14):1480-501. doi:  
36 10.1200/JCO.2013.53.5948.
- 37 27. Reay N. How to measure patient experience and outcomes to demonstrate quality in care.  
38 *Nurs Times*. 2010;106(7):12-4.
- 39 28. Snyder CF, Aaronson NK, Choucair AK, Elliott TE, Greenhalgh J, Halyard MY, et al.  
40 Implementing patient-reported outcomes assessment in clinical practice: a review of the  
41 options and considerations. *Qual Life Res*. 2012;21(8):1305-14. doi: 10.1007/s11136-011-  
42 0054-x.
- 43 29. Patient Act, (SFS 2014:821). [In Swedish]. Patientlag (SFS 2014:821). Stockholm,  
44 Sweden. Socialdepartementet.
- 45 30. Ekman I, Swedberg K, Taft C, Lindseth A, Norberg A, Brink E, et al. Person-centered  
46 care--ready for prime time. *Eur J Cardiovasc Nurs*. 2011;10(4):248-51. doi:  
47 10.1016/j.ejcnurse.2011.06.008.
- 48 31. McDowell I. *Measuring health: a guide to rating scales and questionnaires*. 3rd ed.  
49 Oxford; New York: Oxford University Press; 2006. xvi, 748 p. p.
- 50 32. Post MW. What to Do With "Moderate" Reliability and Validity Coefficients? *Arch Phys*  
51 *Med Rehabil*. 2016;97(7):1051-2. doi: 10.1016/j.apmr.2016.04.001.
- 52  
53  
54  
55  
56  
57  
58  
59  
60

33. Polit DF, Beck CT. *Nursing Research: Generating and Assessing Evidence for Nursing Practice*. 10th ed. Philadelphia: Wolters Kluwer Health/Lippincott Williams and Wilkins; 2016.

34. Eliasson B, Gudbjörnsdóttir S. Diabetes care - improvement through measurement. *Diabetes Res Clin Pract*. 2014;106 Suppl 2:S291-4. doi: 10.1016/S0168-8227(14)70732-6.

35. Gudbjörnsdóttir S, Cederholm J, Nilsson PM, Eliasson B. The National Diabetes Register in Sweden: an implementation of the St. Vincent Declaration for Quality Improvement in Diabetes Care. *Diabetes Care*. 2003;26(4):1270-6.

36. Svensson AM, Gudbjörnsdóttir, S., Samuelsson, P., Miftaraj, M., Eliasson, B., Cederholm, J., Rawshani, A. 20 years of successful improvements. Gothenburg, Sweden; 2016. Available from: [www.ndr.nu](http://www.ndr.nu)

## Figure Legends

Fig. 1. Spearman's rank correlation between the Diabetes Questionnaire scales and the SF-36v2 domains in type 1 diabetes

Diabetes Questionnaire scales: GenW: General Wellbeing; MoE: Mood and Energy; FreW: Free of Worries about blood sugar; ManD: Capabilities to Manage your Diabetes; DiEx: Diet and Exercise; NLD: Not Limited by Diabetes; NLBS: Not Limited by Blood Sugar; SuO: Support from Others; SuDC: Support from Diabetes Care; AcDC: Access to Diabetes Care; CoDC: Continuity in Diabetes Care; MDMT: Medical Devices and Medical Treatment. SF-36v2 domains: PF: physical functioning; RP: role-physical; BP: bodily pain; GH: general health.

Fig. 2. Spearman's rank correlation between the Diabetes Questionnaire scales and the SF-36v2 domains in type 2 diabetes

Diabetes Questionnaire scales: GenW: General Wellbeing; MoE: Mood and Energy; FreW: Free of Worries about blood sugar; ManD: Capabilities to Manage your Diabetes; DiEx: Diet and Exercise; NLD: Not Limited by Diabetes; NLBS: Not Limited by Blood Sugar; SuO: Support from Others; SuDC: Support from Diabetes Care; AcDC: Access to Diabetes Care; CoDC: Continuity in Diabetes Care; MDMT: Medical Devices and Medical Treatment. SF-36v2 domains: PF: physical functioning; RP: role-physical; BP: bodily pain; GH: general health.

Fig. 3. Percent variance in the Diabetes Questionnaire scales explained by the SF-36v2 domains and clinical variables in type 1 (A) and type 2 diabetes (B)

1  
2  
3 GenW: General Wellbeing; MoE: Mood and Energy; FreW: Free of Worries about blood  
4 sugar; ManD: Capabilities to Manage your Diabetes; DiEx: Diet and Exercise; NLD: Not  
5 Limited by Diabetes; NLBS: Not Limited by Blood Sugar; SuO: Support from Others; SuDC:  
6 Support from Diabetes Care; AcDC: Access to Diabetes Care; CoDC: Continuity in Diabetes  
7 Care; MDMT: Medical Devices and Medical Treatment.  
8  
9  
10  
11  
12

13 Fig. 4. Adjusted least square mean estimates with 95% confidence intervals for the Diabetes  
14 Questionnaire scales in type 1 diabetes (A) and type 2 diabetes (B) separated by glycated  
15 haemoglobin (HbA<sub>1c</sub>) level  
16  
17  
18  
19

20 Adjusted for age, sex, diabetes duration, body mass index, systolic blood pressure, LDL  
21 cholesterol level, micro- and macro-albuminuria, estimated glomerular filtration rate,  
22 retinopathy, smoking status, physical activity level, receipt of antihypertensive and lipid  
23 lowering treatments, previous coronary heart disease and previous stroke.  
24  
25  
26  
27  
28

29 GenW: General Wellbeing; MoE: Mood and Energy; FreW: Free of Worries about blood  
30 sugar; ManD: Capabilities to Manage your Diabetes; DiEx: Diet and Exercise; NLD: Not  
31 Limited by Diabetes; NLBS: Not Limited by Blood Sugar; SuO: Support from Others; SuDC:  
32 Support from Diabetes Care; AcDC: Access to Diabetes Care; CoDC: Continuity in Diabetes  
33 Care; MDMT: Medical Devices and Medical Treatment.  
34  
35  
36  
37  
38

### 39 **Supplementary material**

#### 40 **Supplementary figures**

41  
42 Fig. S1. Spearman's rank correlation between the Diabetes Questionnaire scales and clinical  
43 variables in type 1 diabetes  
44  
45  
46  
47

48 Diabetes Questionnaire scales: GenW: General Wellbeing; MoE: Mood and Energy; FreW:  
49 Free of Worries about blood sugar; ManD: Capabilities to Manage your Diabetes; DiEx: Diet  
50 and Exercise; NLD: Not Limited by Diabetes; NLBS: Not Limited by Blood Sugar; SuO:  
51 Support from Others; SuDC: Support from Diabetes Care; AcDC: Access to Diabetes Care;  
52 CoDC: Continuity in Diabetes Care; MDMT: Medical Devices and Medical Treatment.  
53  
54 Clinical variables: BMI: body mass index, SBP: systolic blood pressure, LDL: LDL  
55 cholesterol, HbA<sub>1c</sub>: glycated haemoglobin level.  
56  
57  
58  
59  
60



1  
2  
3 Fig. S2. Spearman's rank correlation between the Diabetes Questionnaire scales and clinical  
4 variables in type 2 diabetes  
5  
6  
7

8 Diabetes Questionnaire scales: GenW: General Wellbeing; MoE: Mood and Energy; FreW:  
9 Free of Worries about blood sugar; ManD: Capabilities to Manage your Diabetes; DiEx: Diet  
10 and Exercise; NLD: Not Limited by Diabetes; NLBS: Not Limited by Blood Sugar; SuO:  
11 Support from Others; SuDC: Support from Diabetes Care; AcDC: Access to Diabetes Care;  
12 CoDC: Continuity in Diabetes Care; MDMT: Medical Devices and Medical Treatment.  
13 Clinical variables: BMI: body mass index, SBP: systolic blood pressure, LDL: LDL  
14 cholesterol, HbA<sub>1c</sub>: glycated haemoglobin level.  
15  
16  
17  
18  
19  
20  
21

22 Fig. S3. Variable importance of clinical variables and the SF-36v2 domains as predictors of  
23 the Diabetes Questionnaire scales GenW (General Wellbeing) and MoE (Mood and Energy)  
24 in type 1 (A and B) and type 2 diabetes (C and D)  
25  
26  
27  
28

29 Clinical variables: BMI: body mass index, SBP: systolic blood pressure, LDL: LDL  
30 cholesterol, HbA<sub>1c</sub>: glycated haemoglobin level.  
31

32 SF-36v2 domains: PF: physical functioning; RP: role-physical; BP: bodily pain; GH: general  
33 health; VT: vitality; SF: social functioning; RE: role-emotional; MH: mental health.  
34  
35  
36  
37

38 Supplementary tables

39 Table S1. Crude means and standard deviations for the Diabetes Questionnaire scales and the  
40 SF-36v2 domains for participants with type 1 diabetes and those with type 2 diabetes  
41  
42  
43

44 Table S2. Clinical and demographic characteristics for non-respondents separated for type 1  
45 and type 2 diabetes  
46  
47  
48

49 Table S3. Spearman's rank correlations with p-values between the Diabetes Questionnaire  
50 scale scores and clinical variables in type 1 diabetes  
51  
52  
53

54 Table S4. Spearman's rank correlations with p-values between the Diabetes Questionnaire  
55 scale scores and clinical variables in type 2 diabetes  
56  
57  
58  
59  
60

Svedbo Engström *et al.* Manuscript, revised version

1  
2  
3 Table S5. Spearman's rank correlations with p-values between the Diabetes Questionnaire  
4 scales and the SF-36v2 domains in type 1 diabetes  
5  
6  
7

8 Table S6. Spearman's rank correlations with p-values between the Diabetes Questionnaire  
9 scales and the SF-36v2 domains in type 2 diabetes  
10  
11  
12

13 Table S7. Least square mean estimates and 95% confidence intervals for the Diabetes  
14 Questionnaire scales in three glycated haemoglobin (HbA<sub>1c</sub>) groups for type 1 and type 2  
15  
16  
17 diabetes  
18  
19  
20  
21  
22  
23  
24  
25  
26  
27  
28  
29  
30  
31  
32  
33  
34  
35  
36  
37  
38  
39  
40  
41  
42  
43  
44  
45  
46  
47  
48  
49  
50  
51  
52  
53  
54  
55  
56  
57  
58  
59  
60

For peer review only

1  
2  
3  
4  
5  
6  
7  
8  
9  
10  
11  
12  
13  
14  
15  
16  
17  
18  
19  
20  
21  
22  
23  
24  
25  
26  
27  
28  
29  
30  
31  
32  
33  
34  
35  
36  
37  
38  
39  
40  
41  
42  
43  
44  
45  
46  
47  
48  
49  
50  
51  
52  
53  
54  
55  
56  
57  
58  
59  
60

**Spearman's rank correlation, Diabetes Questionnaire and SF-36v2 domains, type 1 diabetes**

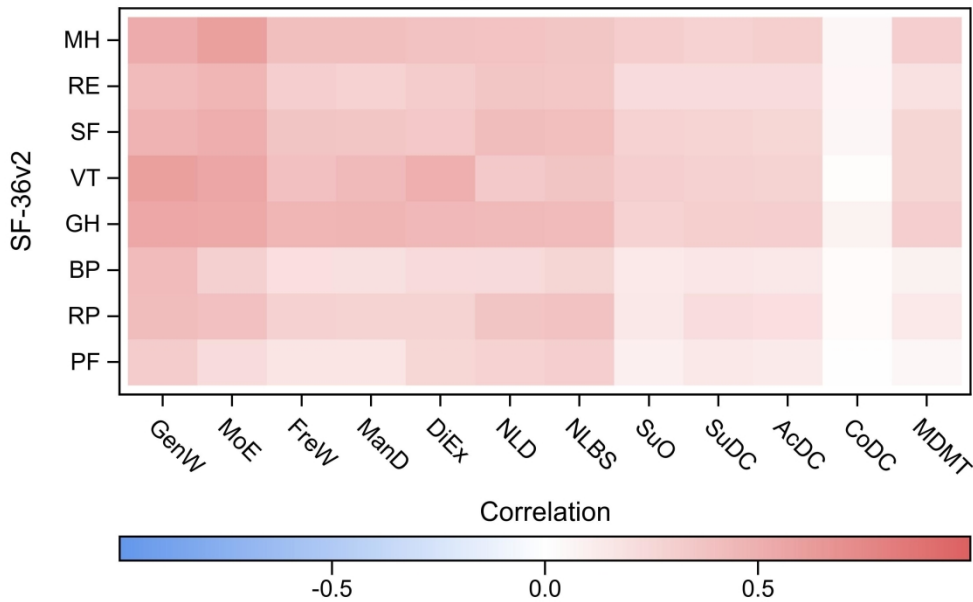

Fig. 1. Spearman's rank correlation between the Diabetes Questionnaire scales and the SF 36v2 domains in type 1 diabetes

127x88mm (600 x 600 DPI)



**Spearman's rank correlation, Diabetes Questionnaire scales and SF-36v2, type 2 diabetes**

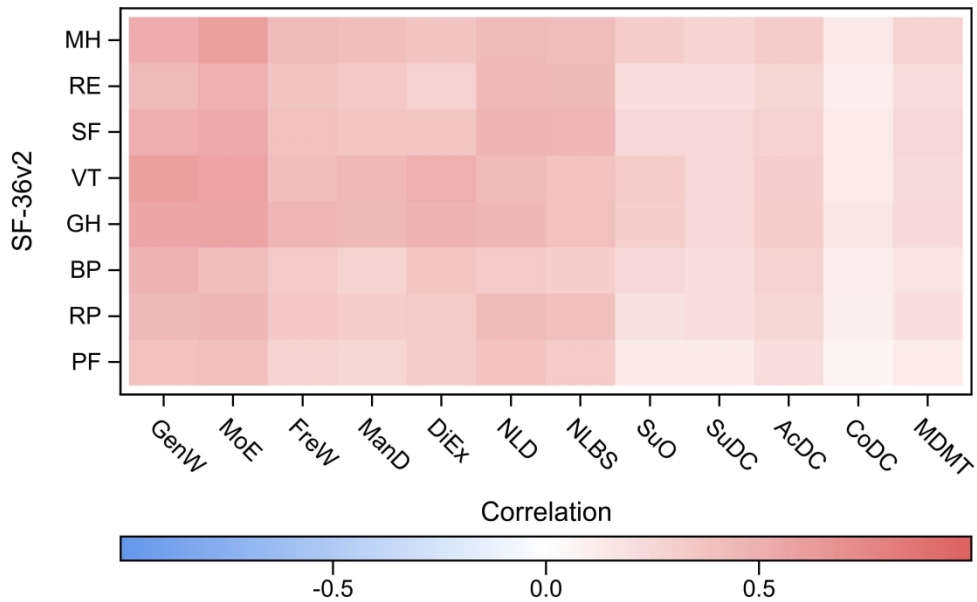

Fig. 2. Spearman's rank correlation between the Diabetes Questionnaire scales and the SF 36v2 domains in type 2 diabetes

127x88mm (600 x 600 DPI)

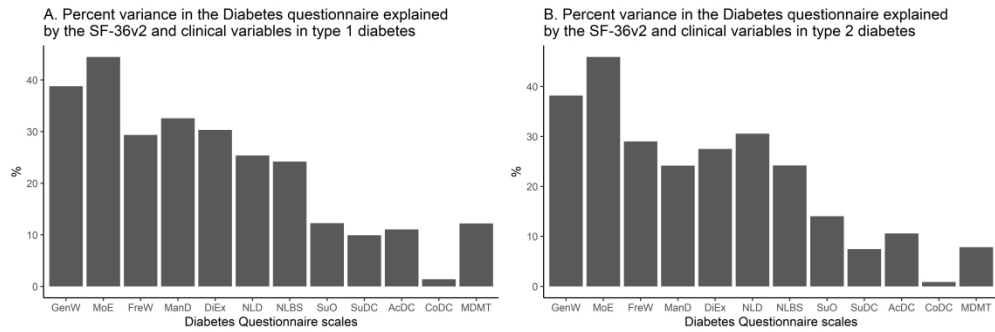

Fig. 3. Percent variance in the Diabetes Questionnaire scales explained by the SF 36v2 domains and clinical variables in type 1 (A) and type 2 diabetes (B)

304x101mm (600 x 600 DPI)



Fig. 4. Adjusted least square mean estimates with 95% confidence intervals for the Diabetes Questionnaire scales in type 1 diabetes (A) and type 2 diabetes (B) separated by glycated haemoglobin (HbA1c) level

349x119mm (300 x 300 DPI)

## SUPPLEMENTARY MATERIAL

*To the article titled*

New diabetes questionnaire to add patients' perspectives to diabetes care for adults with type 1 and type 2 diabetes – Nationwide cross-sectional study of construct validity assessing associations with generic health-related quality of life and clinical variables

*By*

Maria Svedbo Engström; Janeth Leksell; Unn-Britt Johansson; Sixten Borg, Bo Palaszewski; Stefan Franzén; Soffia Gudbjörnsdottir; Katarina Eeg-Olofsson

*Submitted to BMJ Open*

### Supplementary figures

**Spearman's rank correlation, Diabetes Questionnaire and clinical variables, type 1 diabetes**

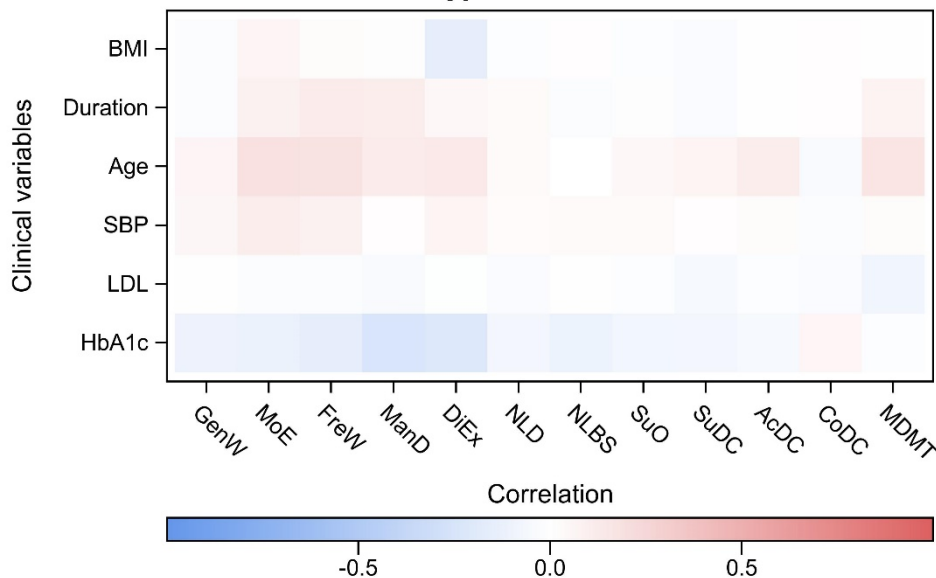

**Fig. S1.** Spearman's rank correlation between the Diabetes Questionnaire scales and clinical variables in type 1 diabetes

Diabetes Questionnaire scales: GenW: General Wellbeing; MoE: Mood and Energy; FreW: Free of Worries about blood sugar; ManD: Capabilities to Manage your Diabetes; DiEx: Diet and Exercise; NLD: Not Limited by Diabetes; NLBS: Not Limited by Blood Sugar; SuO: Support from Others; SuDC: Support from Diabetes Care; AcDC: Access to Diabetes Care; CoDC: Continuity in Diabetes Care; MDMT: Medical Devices and Medical Treatment.

Clinical variables: BMI: body mass index, SBP: systolic blood pressure, LDL: LDL cholesterol, HbA<sub>1c</sub>: glycated haemoglobin level.

Svedbo Engström et al. A new diabetes questionnaire to add patients' perspectives to diabetes care for adults with type 1 and type 2 diabetes – A nationwide cross-sectional study of associations with generic health-related quality of life and clinical variables

**Spearman's rank correlation, Diabetes Questionnaire and clinical variables, type 2 diabetes**

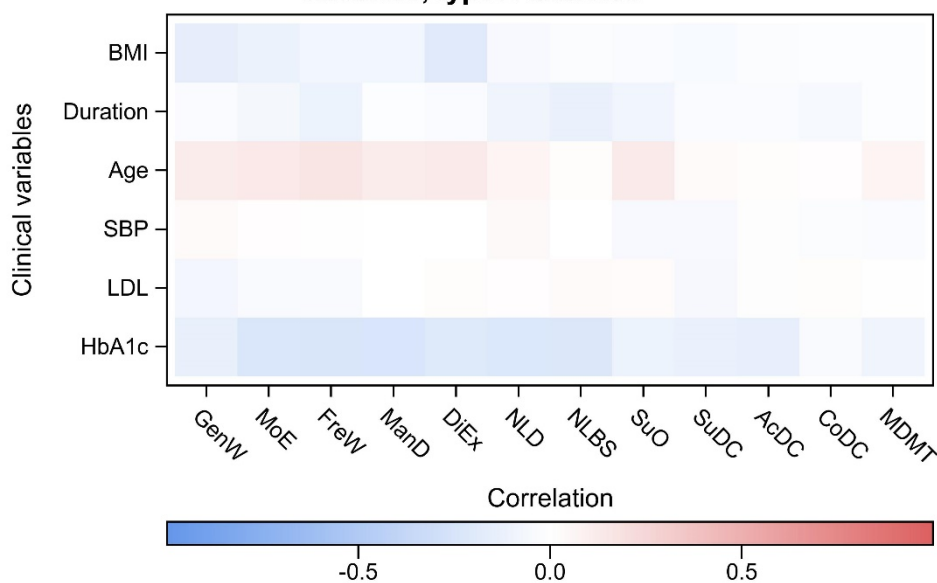

**Fig. S2.** Spearman's rank correlation between the Diabetes Questionnaire scales and clinical variables in type 2 diabetes

Diabetes Questionnaire scales: GenW: General Wellbeing; MoE: Mood and Energy; FreW: Free of Worries about blood sugar; ManD: Capabilities to Manage your Diabetes; DiEx: Diet and Exercise; NLD: Not Limited by Diabetes; NLBS: Not Limited by Blood Sugar; SuO: Support from Others; SuDC: Support from Diabetes Care; AcDC: Access to Diabetes Care; CoDC: Continuity in Diabetes Care; MDMT: Medical Devices and Medical Treatment.

Clinical variables: BMI: body mass index, SBP: systolic blood pressure, LDL: LDL cholesterol, HbA<sub>1c</sub>: glycated haemoglobin level.

Svedbo Engström et al. A new diabetes questionnaire to add patients' perspectives to diabetes care for adults with type 1 and type 2 diabetes – A nationwide cross-sectional study of associations with generic health-related quality of life and clinical variables

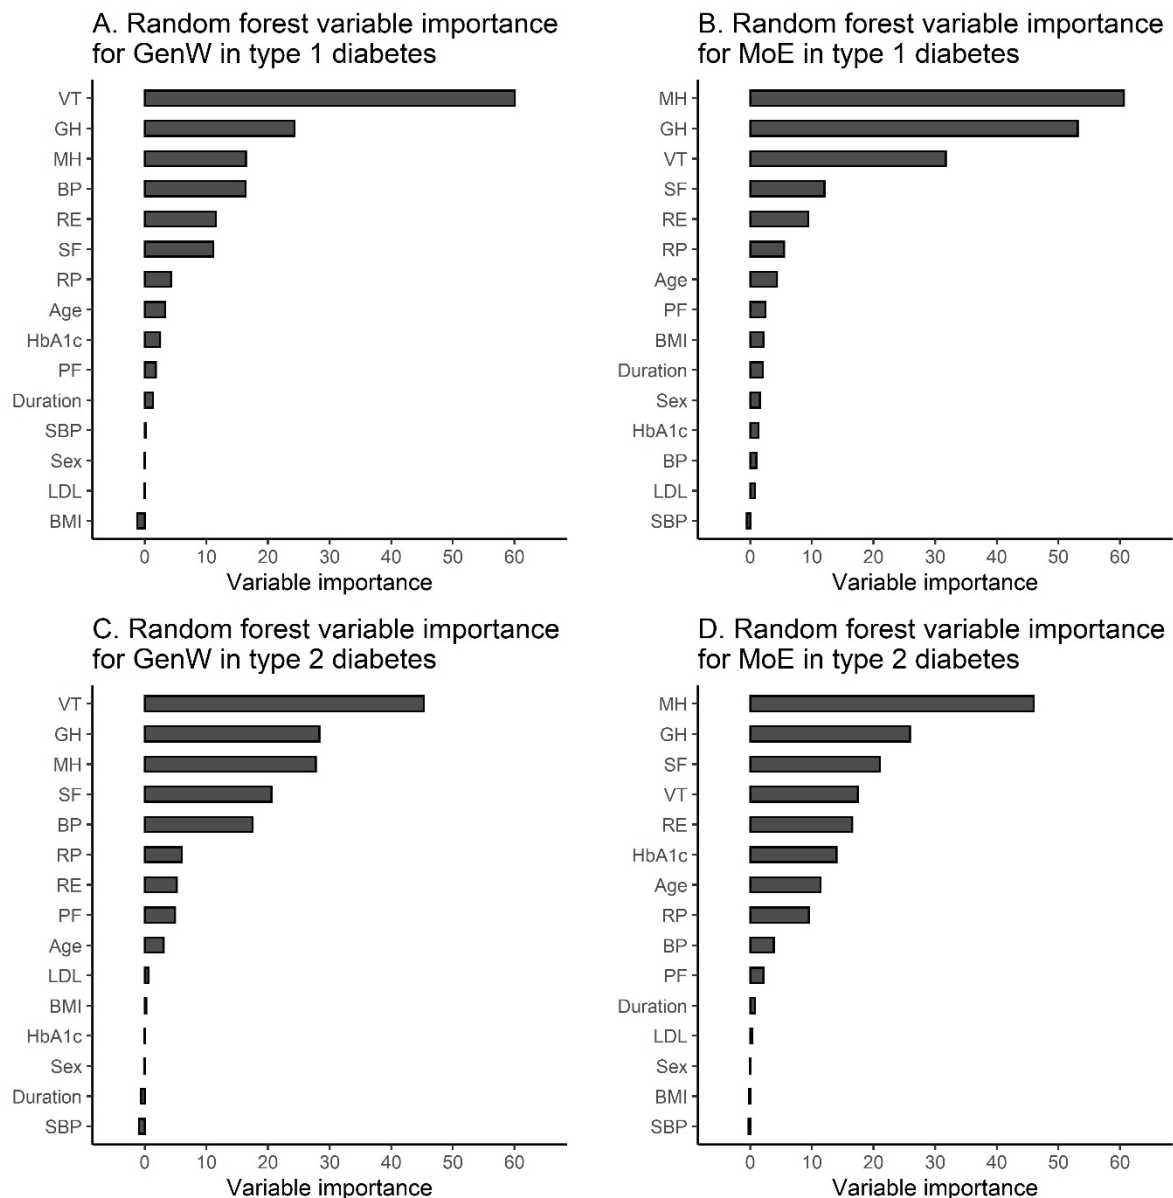

**Fig. S3.** Variable importance of clinical variables and the SF-36v2 domains as predictors of the Diabetes Questionnaire scales GenW (General Wellbeing) and MoE (Mood and Energy) in type 1 (A and B) and type 2 diabetes (C and D)

Clinical variables: BMI: body mass index, SBP: systolic blood pressure, LDL: LDL cholesterol, HbA<sub>1c</sub>: glycated haemoglobin level.

SF-36v2 domains: PF: physical functioning; RP: role-physical; BP: bodily pain; GH: general health; VT: vitality; SF: social functioning; RE: role-emotional; MH: mental health.

Svedbo Engström et al. A new diabetes questionnaire to add patients' perspectives to diabetes care for adults with type 1 and type 2 diabetes – A nationwide cross-sectional study of associations with generic health-related quality of life and clinical variables

## Supplementary tables

**Table S1.** Crude means and standard deviations for the Diabetes Questionnaire scales and the SF-36v2 domains for participants with type 1 diabetes and those with type 2 diabetes

| Diabetes Questionnaire scale | Type 1 diabetes | Type 2 diabetes | p-value | Standardized mean difference, SMD |
|------------------------------|-----------------|-----------------|---------|-----------------------------------|
| GenW                         | 59.69 (23.81)   | 63.76 (24.71)   | <0.001  | 0.168                             |
| MoE                          | 64.07 (23.60)   | 75.19 (22.25)   | <0.001  | 0.485                             |
| FreW                         | 54.89 (21.91)   | 69.03 (22.29)   | <0.001  | 0.640                             |
| ManD                         | 63.20 (20.16)   | 70.48 (19.89)   | <0.001  | 0.364                             |
| DiEx                         | 56.66 (24.36)   | 58.88 (24.08)   | 0.018   | 0.092                             |
| NLD                          | 75.33 (23.47)   | 84.14 (21.70)   | <0.001  | 0.390                             |
| NLBS                         | 69.97 (26.94)   | 80.94 (26.84)   | <0.001  | 0.408                             |
| SuO                          | 62.32 (23.46)   | 66.26 (23.71)   | <0.001  | 0.167                             |
| SuDC                         | 78.35 (20.29)   | 77.89 (22.61)   | 0.574   | 0.022                             |
| AcDC                         | 67.80 (20.73)   | 71.31 (22.61)   | <0.001  | 0.162                             |
| CoDC                         | 80.04 (23.29)   | 71.42 (27.39)   | <0.001  | 0.339                             |
| MDMT                         | 75.40 (21.78)   | 80.47 (18.39)   | <0.001  | 0.252                             |

Diabetes questionnaire scales: GenW: General Wellbeing; MoE: Mood and Energy; FreW: Free of Worries about blood sugar; ManD: Capabilities to Manage your Diabetes; DiEx: Diet and Exercise; NLD: Not Limited by Diabetes; NLBS: Not Limited by Blood Sugar; SuO: Support from Others; SuDC: Support from Diabetes Care; AcDC: Access to Diabetes Care; CoDC: Continuity in Diabetes Care; MDMT: Medical Devices and Medical Treatment.

Svedbo Engström et al. A new diabetes questionnaire to add patients' perspectives to diabetes care for adults with type 1 and type 2 diabetes – A nationwide cross-sectional study of associations with generic health-related quality of life and clinical variables

**Table S2.** Clinical and demographic characteristics for non-responders separated for type 1 and type 2 diabetes

| Variable                           | Type 1 diabetes (n=1106) | Type 2 diabetes (n=1116) |
|------------------------------------|--------------------------|--------------------------|
| Men, %                             | 60.7                     | 58.1                     |
| Age, years (SD)                    | 41.2 (15.5)              | 62.8 (10.9)              |
| Diabetes duration, years (SD)      | 21.7 (14.0)              | 8.7 (7.0)                |
| HbA <sub>1c</sub> , mmol/mol (SD)  | 65.2 (15.1)              | 54.7 (14.3)              |
| BMI, kg/m <sup>2</sup> (SD)        | 26.1 (4.6)               | 30.9 (5.9)               |
| Systolic blood pressure, mmHg (SD) | 126.1 (14.0)             | 134.7 (15.8)             |
| Antihypertensive medication, %     | 34.6                     | 77.5                     |
| LDL-cholesterol, mmol/L (SD)       | 2.53 (0.79)              | 2.64 (0.93)              |
| Lipid-lowering medication, %       | 37.1                     | 60.5                     |
| Micro-albuminuria, %               | 11.4                     | 18.4                     |
| Macro-albuminuria, %               | 5.6                      | 5.0                      |
| Retinopathy, %                     | 66.2                     | 30.5                     |
| Smoker, %                          | 15.7                     | 18.4                     |
| Physical activity, daily, %        | 20.3                     | 27.1                     |
| <b>Diabetes treatment</b>          |                          |                          |
| Diet alone, %                      | -                        | 20.1                     |
| Oral hypoglycaemic agent alone, %  | -                        | 52.5                     |
| Insulin alone, %                   | 97.2                     | 8.1                      |
| Insulin and oral agent, %          | 2.3                      | 16.7                     |
| Insulin pump users, %              | 19.9                     | -                        |

The descriptive statistics are presented as the means and standard deviations (SD) for continuous variables or number and percentages for categorical variables.



Svedbo Engström et al. A new diabetes questionnaire to add patients' perspectives to diabetes care for adults with type 1 and type 2 diabetes – A nationwide cross-sectional study of associations with generic health-related quality of life and clinical variables

**Table S3.** Spearman's rank correlations with p-values between the Diabetes Questionnaire scale scores and clinical variables in type 1 diabetes

| Clinical variable | GenW                  | MoE                   | FreW                  | ManD                  | DiEx                  | NLD               | NLBS                  | SuO               | SuDC              | AcDC                 | CoDC              | MDMT                 |
|-------------------|-----------------------|-----------------------|-----------------------|-----------------------|-----------------------|-------------------|-----------------------|-------------------|-------------------|----------------------|-------------------|----------------------|
| Age               | 0.06<br>(0.0184)      | 0.19<br>( $<.0001$ )  | 0.18<br>( $<.0001$ )  | 0.13<br>( $<.0001$ )  | 0.14<br>( $<.0001$ )  | 0.03<br>(0.2050)  | 0.01<br>(0.8445)      | 0.05<br>(0.0875)  | 0.07<br>(0.0093)  | 0.11<br>( $<.0001$ ) | -0.04<br>(0.1635) | 0.17<br>( $<.0001$ ) |
| Diabetes duration | -0.02<br>(0.4673)     | 0.09<br>(0.0006)      | 0.13<br>( $<.0001$ )  | 0.11<br>( $<.0001$ )  | 0.05<br>(0.0456)      | 0.04<br>(0.1981)  | -0.02<br>(0.4678)     | -0.01<br>(0.6936) | -0.03<br>(0.2024) | -0.00<br>(0.9883)    | 0.01<br>(0.6045)  | 0.08<br>(0.0027)     |
| HbA <sub>1c</sub> | -0.12<br>( $<.0001$ ) | -0.12<br>( $<.0001$ ) | -0.16<br>( $<.0001$ ) | -0.25<br>( $<.0001$ ) | -0.21<br>( $<.0001$ ) | -0.07<br>(0.0073) | -0.12<br>( $<.0001$ ) | -0.08<br>(0.0101) | -0.07<br>(0.0070) | -0.05<br>(0.0542)    | 0.06<br>(0.0356)  | -0.02<br>(0.5485)    |
| BMI               | -0.02<br>(0.4601)     | 0.07<br>(0.0151)      | 0.03<br>(0.2763)      | -0.01<br>(0.6738)     | -0.15<br>( $<.0001$ ) | -0.01<br>(0.6239) | 0.02<br>(0.5767)      | -0.01<br>(0.6620) | -0.03<br>(0.2568) | -0.00<br>(0.9175)    | 0.02<br>(0.5998)  | 0.01<br>(0.7292)     |
| SBP               | 0.06<br>(0.0231)      | 0.12<br>( $<.0001$ )  | 0.09<br>(0.0005)      | 0.02<br>(0.5036)      | 0.07<br>(0.0072)      | 0.03<br>(0.3393)  | 0.03<br>(0.2152)      | 0.03<br>(0.3092)  | 0.01<br>(0.6002)  | 0.03<br>(0.2773)     | -0.03<br>(0.3239) | 0.03<br>(0.2610)     |
| LDL               | -0.00<br>(0.9452)     | -0.02<br>(0.4805)     | -0.02<br>(0.4380)     | -0.04<br>(0.1549)     | -0.01<br>(0.8077)     | -0.03<br>(0.2406) | -0.00<br>(0.9780)     | -0.02<br>(0.5905) | -0.06<br>(0.0474) | -0.02<br>(0.5275)    | -0.03<br>(0.2873) | -0.09<br>(0.0023)    |

Diabetes questionnaire scales: GenW: General Wellbeing; MoE: Mood and Energy; FreW: Free of Worries about blood sugar; ManD: Capabilities to Manage your Diabetes; DiEx: Diet and Exercise; NLD: Not Limited by Diabetes; NLBS: Not Limited by Blood Sugar; SuO: Support from Others; SuDC: Support from Diabetes Care; AcDC: Access to Diabetes Care; CoDC: Continuity in Diabetes Care; MDMT: Medical Devices and Medical Treatment.

Clinical variables: BMI: body mass index; SBP: systolic blood pressure; LDL: LDL cholesterol; HbA<sub>1c</sub>: glycated haemoglobin level.

Svedbo Engström et al. A new diabetes questionnaire to add patients' perspectives to diabetes care for adults with type 1 and type 2 diabetes – A nationwide cross-sectional study of associations with generic health-related quality of life and clinical variables

**Table S4.** Spearman's rank correlations with p-values between the Diabetes Questionnaire scale scores and clinical variables in type 2 diabetes

| Clinical variable | GenW              | MoE               | FreW              | ManD              | DiEx              | NLD               | NLBS              | SuO               | SuDC              | AcDC              | CoDC              | MDMT              |
|-------------------|-------------------|-------------------|-------------------|-------------------|-------------------|-------------------|-------------------|-------------------|-------------------|-------------------|-------------------|-------------------|
| Age               | 0.12<br>(<.0001)  | 0.14<br>(<.0001)  | 0.16<br>(<.0001)  | 0.12<br>(<.0001)  | 0.14<br>(<.0001)  | 0.07<br>(0.0061)  | 0.02<br>(0.3646)  | 0.13<br>(0.0002)  | 0.04<br>(0.1926)  | 0.02<br>(0.3657)  | 0.01<br>(0.6265)  | 0.07<br>(0.0089)  |
| Diabetes duration | -0.03<br>(0.2226) | -0.07<br>(0.0202) | -0.11<br>(<.0001) | -0.02<br>(0.5662) | -0.04<br>(0.1868) | -0.10<br>(0.0007) | -0.13<br>(<.0001) | -0.09<br>(0.0184) | -0.04<br>(0.2043) | -0.03<br>(0.2353) | -0.06<br>(0.0570) | -0.01<br>(0.6150) |
| HbA <sub>1c</sub> | -0.14<br>(<.0001) | -0.24<br>(<.0001) | -0.24<br>(<.0001) | -0.24<br>(<.0001) | -0.21<br>(<.0001) | -0.23<br>(<.0001) | -0.22<br>(<.0001) | -0.11<br>(0.0015) | -0.13<br>(<.0001) | -0.15<br>(<.0001) | -0.04<br>(0.1270) | -0.09<br>(0.0012) |
| BMI               | -0.15<br>(<.0001) | -0.12<br>(<.0001) | -0.08<br>(0.0046) | -0.08<br>(0.0037) | -0.20<br>(<.0001) | -0.05<br>(0.0752) | -0.03<br>(0.3242) | -0.03<br>(0.4203) | -0.05<br>(0.0854) | -0.03<br>(0.3238) | -0.01<br>(0.6580) | -0.02<br>(0.5507) |
| SBP               | 0.03<br>(0.2195)  | 0.02<br>(0.5649)  | 0.01<br>(0.7496)  | 0.00<br>(0.9131)  | 0.00<br>(0.8954)  | 0.04<br>(0.1082)  | 0.01<br>(0.8433)  | -0.05<br>(0.1746) | -0.05<br>(0.0781) | -0.01<br>(0.6444) | -0.02<br>(0.4327) | -0.03<br>(0.2736) |
| LDL               | -0.07<br>(0.0151) | -0.04<br>(0.1773) | -0.04<br>(0.1310) | 0.00<br>(0.9813)  | 0.02<br>(0.4793)  | 0.02<br>(0.5751)  | 0.04<br>(0.2250)  | 0.03<br>(0.4554)  | -0.06<br>(0.0504) | -0.01<br>(0.7171) | 0.02<br>(0.5061)  | 0.01<br>(0.8070)  |

Diabetes questionnaire scales: GenW: General Wellbeing; MoE: Mood and Energy; FreW: Free of Worries about blood sugar; ManD: Capabilities to Manage your Diabetes; DiEx: Diet and Exercise; NLD: Not Limited by Diabetes; NLBS: Not Limited by Blood Sugar; SuO: Support from Others; SuDC: Support from Diabetes Care; AcDC: Access to Diabetes Care; CoDC: Continuity in Diabetes Care; MDMT: Medical Devices and Medical Treatment.

Clinical variables: BMI: body mass index; SBP: systolic blood pressure; LDL: LDL cholesterol; HbA<sub>1c</sub>: glycated haemoglobin level.

Svedbo Engström et al. A new diabetes questionnaire to add patients' perspectives to diabetes care for adults with type 1 and type 2 diabetes – A nationwide cross-sectional study of associations with generic health-related quality of life and clinical variables

**Table S5.** Spearman's rank correlations with p-values between the Diabetes Questionnaire scales and the SF-36v2 domains in type 1 diabetes

| Diabetes Questionnaire scale | SF-36v2 domain       |                      |                      |                      |                      |                      |                      |                      |
|------------------------------|----------------------|----------------------|----------------------|----------------------|----------------------|----------------------|----------------------|----------------------|
|                              | PF                   | RP                   | BP                   | GH                   | VT                   | RF                   | SF                   | MH                   |
| GenW                         | 0.33<br>( $<.0001$ ) | 0.43<br>( $<.0001$ ) | 0.43<br>( $<.0001$ ) | 0.56<br>( $<.0001$ ) | 0.60<br>( $<.0001$ ) | 0.43<br>( $<.0001$ ) | 0.48<br>( $<.0001$ ) | 0.53<br>( $<.0001$ ) |
| MoE                          | 0.23<br>( $<.0001$ ) | 0.40<br>( $<.0001$ ) | 0.30<br>( $<.0001$ ) | 0.55<br>( $<.0001$ ) | 0.57<br>( $<.0001$ ) | 0.46<br>( $<.0001$ ) | 0.52<br>( $<.0001$ ) | 0.60<br>( $<.0001$ ) |
| FreW                         | 0.17<br>( $<.0001$ ) | 0.29<br>( $<.0001$ ) | 0.21<br>( $<.0001$ ) | 0.46<br>( $<.0001$ ) | 0.40<br>( $<.0001$ ) | 0.31<br>( $<.0001$ ) | 0.38<br>( $<.0001$ ) | 0.41<br>( $<.0001$ ) |
| ManD                         | 0.18<br>( $<.0001$ ) | 0.28<br>( $<.0001$ ) | 0.20<br>( $<.0001$ ) | 0.47<br>( $<.0001$ ) | 0.44<br>( $<.0001$ ) | 0.29<br>( $<.0001$ ) | 0.37<br>( $<.0001$ ) | 0.41<br>( $<.0001$ ) |
| DiEx                         | 0.26<br>( $<.0001$ ) | 0.28<br>( $<.0001$ ) | 0.23<br>( $<.0001$ ) | 0.45<br>( $<.0001$ ) | 0.51<br>( $<.0001$ ) | 0.32<br>( $<.0001$ ) | 0.35<br>( $<.0001$ ) | 0.39<br>( $<.0001$ ) |
| NLD                          | 0.29<br>( $<.0001$ ) | 0.37<br>( $<.0001$ ) | 0.24<br>( $<.0001$ ) | 0.44<br>( $<.0001$ ) | 0.34<br>( $<.0001$ ) | 0.37<br>( $<.0001$ ) | 0.42<br>( $<.0001$ ) | 0.38<br>( $<.0001$ ) |
| NLBS                         | 0.31<br>( $<.0001$ ) | 0.39<br>( $<.0001$ ) | 0.27<br>( $<.0001$ ) | 0.43<br>( $<.0001$ ) | 0.37<br>( $<.0001$ ) | 0.35<br>( $<.0001$ ) | 0.41<br>( $<.0001$ ) | 0.36<br>( $<.0001$ ) |
| SuO                          | 0.10<br>(0.0017)     | 0.15<br>( $<.0001$ ) | 0.14<br>( $<.0001$ ) | 0.29<br>( $<.0001$ ) | 0.30<br>( $<.0001$ ) | 0.23<br>( $<.0001$ ) | 0.29<br>( $<.0001$ ) | 0.32<br>( $<.0001$ ) |
| SuDC                         | 0.15<br>( $<.0001$ ) | 0.22<br>( $<.0001$ ) | 0.16<br>( $<.0001$ ) | 0.31<br>( $<.0001$ ) | 0.29<br>( $<.0001$ ) | 0.23<br>( $<.0001$ ) | 0.27<br>( $<.0001$ ) | 0.29<br>( $<.0001$ ) |
| AcDC                         | 0.13<br>( $<.0001$ ) | 0.20<br>( $<.0001$ ) | 0.15<br>( $<.0001$ ) | 0.30<br>( $<.0001$ ) | 0.28<br>( $<.0001$ ) | 0.23<br>( $<.0001$ ) | 0.26<br>( $<.0001$ ) | 0.31<br>( $<.0001$ ) |
| CoDC                         | 0.01<br>(0.8176)     | 0.03<br>(0.3182)     | 0.03<br>(0.3309)     | 0.08<br>(0.0027)     | 0.02<br>(0.3822)     | 0.06<br>(0.0375)     | 0.06<br>(0.0297)     | 0.06<br>(0.0335)     |
| MDMT                         | 0.06<br>(0.0240)     | 0.14<br>( $<.0001$ ) | 0.09<br>(0.0006)     | 0.30<br>( $<.0001$ ) | 0.27<br>( $<.0001$ ) | 0.19<br>( $<.0001$ ) | 0.26<br>( $<.0001$ ) | 0.30<br>( $<.0001$ ) |

Diabetes Questionnaire scales: GenW: General Wellbeing; MoE: Mood and Energy; FreW: Free of Worries about blood sugar; ManD: Capabilities to Manage your Diabetes; DiEx: Diet and Exercise; NLD: Not Limited by Diabetes; NLBS: Not Limited by Blood Sugar; SuO: Support from Others; SuDC: Support from Diabetes Care; AcDC: Access to Diabetes Care; CoDC: Continuity in Diabetes Care; MDMT: Medical Devices and Medical Treatment.

SF-36v2 domains: PF: physical functioning; RP: role-physical; BP: bodily pain; GH: general health; VT: vitality; SF: social functioning; RE: role-emotional; MH: mental health.

Svedbo Engström et al. A new diabetes questionnaire to add patients' perspectives to diabetes care for adults with type 1 and type 2 diabetes – A nationwide cross-sectional study of associations with generic health-related quality of life and clinical variables

**Table S6.** Spearman's rank correlations with p-values between the Diabetes Questionnaire scales and the SF-36v2 domains in type 2 diabetes

| Diabetes Questionnaire scale | SF-36v2 domain       |                      |                      |                      |                      |                      |                      |                      |
|------------------------------|----------------------|----------------------|----------------------|----------------------|----------------------|----------------------|----------------------|----------------------|
|                              | PF                   | RP                   | BP                   | GH                   | VT                   | RF                   | SF                   | MH                   |
| GenW                         | 0.39<br>( $<.0001$ ) | 0.44<br>( $<.0001$ ) | 0.48<br>( $<.0001$ ) | 0.56<br>( $<.0001$ ) | 0.60<br>( $<.0001$ ) | 0.44<br>( $<.0001$ ) | 0.51<br>( $<.0001$ ) | 0.53<br>( $<.0001$ ) |
| MoE                          | 0.41<br>( $<.0001$ ) | 0.45<br>( $<.0001$ ) | 0.42<br>( $<.0001$ ) | 0.57<br>( $<.0001$ ) | 0.58<br>( $<.0001$ ) | 0.51<br>( $<.0001$ ) | 0.54<br>( $<.0001$ ) | 0.60<br>( $<.0001$ ) |
| FreW                         | 0.28<br>( $<.0001$ ) | 0.35<br>( $<.0001$ ) | 0.34<br>( $<.0001$ ) | 0.47<br>( $<.0001$ ) | 0.42<br>( $<.0001$ ) | 0.38<br>( $<.0001$ ) | 0.40<br>( $<.0001$ ) | 0.43<br>( $<.0001$ ) |
| ManD                         | 0.26<br>( $<.0001$ ) | 0.32<br>( $<.0001$ ) | 0.28<br>( $<.0001$ ) | 0.44<br>( $<.0001$ ) | 0.45<br>( $<.0001$ ) | 0.34<br>( $<.0001$ ) | 0.37<br>( $<.0001$ ) | 0.42<br>( $<.0001$ ) |
| DiEx                         | 0.32<br>( $<.0001$ ) | 0.33<br>( $<.0001$ ) | 0.36<br>( $<.0001$ ) | 0.48<br>( $<.0001$ ) | 0.51<br>( $<.0001$ ) | 0.30<br>( $<.0001$ ) | 0.36<br>( $<.0001$ ) | 0.38<br>( $<.0001$ ) |
| NLD                          | 0.38<br>( $<.0001$ ) | 0.44<br>( $<.0001$ ) | 0.34<br>( $<.0001$ ) | 0.46<br>( $<.0001$ ) | 0.43<br>( $<.0001$ ) | 0.45<br>( $<.0001$ ) | 0.47<br>( $<.0001$ ) | 0.43<br>( $<.0001$ ) |
| NLBS                         | 0.34<br>( $<.0001$ ) | 0.40<br>( $<.0001$ ) | 0.31<br>( $<.0001$ ) | 0.40<br>( $<.0001$ ) | 0.38<br>( $<.0001$ ) | 0.44<br>( $<.0001$ ) | 0.46<br>( $<.0001$ ) | 0.42<br>( $<.0001$ ) |
| SuO                          | 0.14<br>(0.0001)     | 0.19<br>( $<.0001$ ) | 0.25<br>( $<.0001$ ) | 0.31<br>( $<.0001$ ) | 0.32<br>( $<.0001$ ) | 0.20<br>( $<.0001$ ) | 0.26<br>( $<.0001$ ) | 0.32<br>( $<.0001$ ) |
| SuDC                         | 0.14<br>( $<.0001$ ) | 0.21<br>( $<.0001$ ) | 0.21<br>( $<.0001$ ) | 0.26<br>( $<.0001$ ) | 0.25<br>( $<.0001$ ) | 0.21<br>( $<.0001$ ) | 0.26<br>( $<.0001$ ) | 0.28<br>( $<.0001$ ) |
| AcDC                         | 0.22<br>( $<.0001$ ) | 0.26<br>( $<.0001$ ) | 0.28<br>( $<.0001$ ) | 0.32<br>( $<.0001$ ) | 0.31<br>( $<.0001$ ) | 0.26<br>( $<.0001$ ) | 0.29<br>( $<.0001$ ) | 0.32<br>( $<.0001$ ) |
| CoDC                         | 0.07<br>(0.0130)     | 0.10<br>(0.0006)     | 0.11<br>(0.0001)     | 0.16<br>( $<.0001$ ) | 0.13<br>( $<.0001$ ) | 0.11<br>(0.0002)     | 0.13<br>( $<.0001$ ) | 0.14<br>( $<.0001$ ) |
| MDMT                         | 0.13<br>( $<.0001$ ) | 0.20<br>( $<.0001$ ) | 0.18<br>( $<.0001$ ) | 0.24<br>( $<.0001$ ) | 0.24<br>( $<.0001$ ) | 0.22<br>( $<.0001$ ) | 0.26<br>( $<.0001$ ) | 0.28<br>( $<.0001$ ) |

Diabetes Questionnaire scales: GenW: General Wellbeing; MoE: Mood and Energy; FreW: Free of Worries about blood sugar; ManD: Capabilities to Manage your Diabetes; DiEx: Diet and Exercise; NLD: Not Limited by Diabetes; NLBS: Not Limited by Blood Sugar; SuO: Support from Others; SuDC: Support from Diabetes Care; AcDC: Access to Diabetes Care; CoDC: Continuity in Diabetes Care; MDMT: Medical Devices and Medical Treatment.

SF-36v2 domains: PF: physical functioning; RP: role-physical; BP: bodily pain; GH: general health; VT: vitality; SF: social functioning; RE: role-emotional; MH: mental health.

Svedbo Engström et al. A new diabetes questionnaire to add patients' perspectives to diabetes care for adults with type 1 and type 2 diabetes – A nationwide cross-sectional study of associations with generic health-related quality of life and clinical variables

**Table S7.** Least square mean estimates and 95% confidence intervals for the Diabetes Questionnaire scales in three glycated haemoglobin (HbA<sub>1c</sub>) groups for type 1 and type 2 diabetes

| Diabetes Questionnaire scale | Type 1 diabetes                   |                                     |                                   |                                   |                                     |                                   | Type 2 diabetes                   |                                     |                                   |                                   |                                     |                                   |
|------------------------------|-----------------------------------|-------------------------------------|-----------------------------------|-----------------------------------|-------------------------------------|-----------------------------------|-----------------------------------|-------------------------------------|-----------------------------------|-----------------------------------|-------------------------------------|-----------------------------------|
|                              | Unadjusted analysis               |                                     |                                   | Adjusted analysis                 |                                     |                                   | Unadjusted analysis               |                                     |                                   | Adjusted analysis                 |                                     |                                   |
|                              | HbA <sub>1c</sub> <52<br>mmol/mol | HbA <sub>1c</sub> 52-69<br>mmol/mol | HbA <sub>1c</sub> ≥70<br>mmol/mol | HbA <sub>1c</sub> <52<br>mmol/mol | HbA <sub>1c</sub> 52-69<br>mmol/mol | HbA <sub>1c</sub> ≥70<br>mmol/mol | HbA <sub>1c</sub> <52<br>mmol/mol | HbA <sub>1c</sub> 52-69<br>mmol/mol | HbA <sub>1c</sub> ≥70<br>mmol/mol | HbA <sub>1c</sub> <52<br>mmol/mol | HbA <sub>1c</sub> 52-69<br>mmol/mol | HbA <sub>1c</sub> ≥70<br>mmol/mol |
| GenW                         | 64.33<br>(63.46-65.20)            | 59.27<br>(58.74-59.79)              | 56.34<br>(55.49-57.19)            | 51.11<br>(49.14-53.07)            | 47.23<br>(45.44-49.01)              | 45.66<br>(43.80-47.53)            | 65.97<br>(65.41-66.54)            | 62.92<br>(62.24-63.60)              | 54.26<br>(52.90-55.62)            | 63.63<br>(62.10-65.15)            | 62.81<br>(61.29-64.32)              | 56.81<br>(54.85-58.78)            |
| MoE                          | 67.15<br>(66.29-68.01)            | 65.14<br>(64.62-65.66)              | 58.32<br>(57.48-59.16)            | 57.77<br>(55.87-59.66)            | 56.14<br>(54.41-57.86)              | 49.75<br>(47.96-51.54)            | 79.24<br>(78.74-79.74)            | 72.75<br>(72.15-73.35)              | 61.02<br>(59.80-62.25)            | 77.12<br>(75.78-78.46)            | 72.23<br>(70.91-73.56)              | 60.73<br>(58.99-62.46)            |
| FreW                         | 58.21<br>(57.41-59.01)            | 56.09<br>(55.61-56.58)              | 48.72<br>(47.96-49.49)            | 55.28<br>(53.51-57.05)            | 52.22<br>(50.61-53.82)              | 46.09<br>(44.42-47.75)            | 73.07<br>(72.57-73.57)            | 66.72<br>(66.12-67.32)              | 54.82<br>(53.62-56.03)            | 70.39<br>(69.03-71.75)            | 65.51<br>(64.16-66.86)              | 54.66<br>(52.90-56.42)            |
| ManD                         | 70.05<br>(69.33-70.78)            | 63.88<br>(63.45-64.32)              | 55.09<br>(54.40-55.79)            | 64.84<br>(63.20-66.47)            | 59.71<br>(58.23-61.19)              | 51.49<br>(49.95-53.03)            | 74.12<br>(73.67-74.56)            | 67.74<br>(67.20-68.28)              | 60.35<br>(59.26-61.43)            | 71.53<br>(70.33-72.74)            | 66.65<br>(65.46-67.85)              | 60.07<br>(58.51-61.63)            |
| DiEx                         | 63.95<br>(63.07-64.84)            | 56.52<br>(55.98-57.06)              | 50.18<br>(49.32-51.04)            | 54.44<br>(52.50-56.37)            | 50.59<br>(48.83-52.35)              | 45.40<br>(43.57-47.23)            | 62.48<br>(61.92-63.03)            | 55.86<br>(55.20-56.52)              | 50.13<br>(48.80-51.47)            | 57.97<br>(56.54-59.40)            | 55.31<br>(53.91-56.72)              | 52.85<br>(51.02-54.68)            |
| NLD                          | 76.79<br>(75.93-77.66)            | 76.59<br>(76.07-77.11)              | 70.75<br>(69.92-71.58)            | 68.78<br>(66.84-70.71)            | 70.09<br>(68.33-71.85)              | 64.26<br>(62.44-66.09)            | 87.94<br>(87.46-88.43)            | 81.82<br>(81.23-82.40)              | 71.54<br>(70.37-72.71)            | 83.17<br>(81.79-84.55)            | 78.57<br>(77.21-79.94)              | 69.61<br>(67.83-71.38)            |
| NLBS                         | 74.54<br>(73.54-75.54)            | 70.33<br>(69.73-70.93)              | 64.60<br>(63.63-65.58)            | 64.39<br>(62.08-66.69)            | 61.14<br>(59.05-63.23)              | 57.16<br>(54.98-59.33)            | 85.59<br>(84.98-86.20)            | 77.91<br>(77.18-78.64)              | 65.85<br>(64.37-67.33)            | 81.69<br>(79.96-83.43)            | 75.53<br>(73.81-77.25)              | 65.42<br>(63.19-67.65)            |
| SuO                          | 66.33<br>(65.31-67.35)            | 61.93<br>(61.32-62.54)              | 59.61<br>(58.63-60.59)            | 63.01<br>(60.74-65.28)            | 59.84<br>(57.79-61.88)              | 58.00<br>(55.86-60.14)            | 68.56<br>(67.83-69.29)            | 65.70<br>(64.89-66.51)              | 57.12<br>(55.49-58.74)            | 68.47<br>(66.77-70.16)            | 66.84<br>(65.20-68.48)              | 57.40<br>(55.25-59.56)            |
| SuDC                         | 79.87<br>(79.13-80.61)            | 79.34<br>(78.89-79.79)              | 74.41<br>(73.70-75.13)            | 77.71<br>(76.01-79.41)            | 77.27<br>(75.73-78.81)              | 73.04<br>(71.44-74.64)            | 80.06<br>(79.54-80.58)            | 76.49<br>(75.87-77.11)              | 70.89<br>(69.64-72.14)            | 77.76<br>(76.38-79.14)            | 75.23<br>(73.86-76.59)              | 72.46<br>(70.69-74.24)            |
| AcDC                         | 69.08<br>(68.32-69.84)            | 68.52<br>(68.06-68.98)              | 64.78<br>(64.05-65.51)            | 64.69<br>(62.96-66.42)            | 64.90<br>(63.33-66.47)              | 62.54<br>(60.91-64.17)            | 73.64<br>(73.12-74.16)            | 69.68<br>(69.06-70.30)              | 64.39<br>(63.14-65.64)            | 70.33<br>(68.92-71.75)            | 68.12<br>(66.72-69.52)              | 65.20<br>(63.37-67.02)            |

Svedbo Engström et al. A new diabetes questionnaire to add patients' perspectives to diabetes care for adults with type 1 and type 2 diabetes – A nationwide cross-sectional study of associations with generic health-related quality of life and clinical variables

| Diabetes Questionnaire scale | Type 1 diabetes                   |                                     |                                   |                                   |                                     |                                   | Type 2 diabetes                   |                                     |                                   |                                   |                                     |                                   |
|------------------------------|-----------------------------------|-------------------------------------|-----------------------------------|-----------------------------------|-------------------------------------|-----------------------------------|-----------------------------------|-------------------------------------|-----------------------------------|-----------------------------------|-------------------------------------|-----------------------------------|
|                              | Unadjusted analysis               |                                     |                                   | Adjusted analysis                 |                                     |                                   | Unadjusted analysis               |                                     |                                   | Adjusted analysis                 |                                     |                                   |
|                              | HbA <sub>1c</sub> <52<br>mmol/mol | HbA <sub>1c</sub> 52-69<br>mmol/mol | HbA <sub>1c</sub> ≥70<br>mmol/mol | HbA <sub>1c</sub> <52<br>mmol/mol | HbA <sub>1c</sub> 52-69<br>mmol/mol | HbA <sub>1c</sub> ≥70<br>mmol/mol | HbA <sub>1c</sub> <52<br>mmol/mol | HbA <sub>1c</sub> 52-69<br>mmol/mol | HbA <sub>1c</sub> ≥70<br>mmol/mol | HbA <sub>1c</sub> <52<br>mmol/mol | HbA <sub>1c</sub> 52-69<br>mmol/mol | HbA <sub>1c</sub> ≥70<br>mmol/mol |
| CoDC                         | 78.03<br>(77.13-78.92)            | 80.76<br>(80.22-81.29)              | 80.05<br>(79.20-80.90)            | 74.89<br>(72.88-76.90)            | 77.58<br>(75.75-79.41)              | 76.08<br>(74.18-77.97)            | 72.45<br>(71.77-73.12)            | 70.90<br>(70.11-71.70)              | 67.72<br>(66.11-69.33)            | 72.22<br>(70.34-74.09)            | 70.45<br>(68.59-72.31)              | 68.43<br>(66.01-70.84)            |
| MDMT                         | 77.14<br>(76.34-77.94)            | 75.78<br>(75.30-76.26)              | 72.81<br>(72.04-73.58)            | 72.21<br>(70.41-74.01)            | 71.74<br>(70.11-73.38)              | 70.14<br>(68.45-71.84)            | 82.46<br>(82.02-82.90)            | 78.80<br>(78.29-79.31)              | 76.45<br>(75.41-77.48)            | 81.42<br>(80.23-82.62)            | 78.79<br>(77.62-79.96)              | 76.64<br>(75.11-78.17)            |

**Table S7 continued.** GenW: General Wellbeing; MoE: Mood and Energy; FreW: Free of Worries about blood sugar; ManD: Capabilities to Manage your Diabetes; DiEx: Diet and Exercise; NLD: Not Limited by Diabetes; NLBS: Not Limited by Blood Sugar; SuO: Support from Others; SuDC: Support from Diabetes Care; AcDC: Access to Diabetes Care; CoDC: Continuity in Diabetes Care; MDMT: Medical Devices and Medical Treatment

# Reporting checklist for cross sectional study.

Based on the STROBE cross sectional guidelines.

## Instructions to authors

Complete this checklist by entering the page numbers from your manuscript where readers will find each of the items listed below.

Your article may not currently address all the items on the checklist. Please modify your text to include the missing information. If you are certain that an item does not apply, please write "n/a" and provide a short explanation.

Upload your completed checklist as an extra file when you submit to a journal.

In your methods section, say that you used the STROBE cross sectional reporting guidelines, and cite them as:

von Elm E, Altman DG, Egger M, Pocock SJ, Gotsche PC, Vandenbroucke JP. The Strengthening the Reporting of Observational Studies in Epidemiology (STROBE) Statement: guidelines for reporting observational studies.

|  | Reporting Item                                                                                         | Page Number |
|--|--------------------------------------------------------------------------------------------------------|-------------|
|  | <b>Title and abstract</b>                                                                              |             |
|  | Title                                                                                                  |             |
|  | <a href="#">#1a</a> Indicate the study's design with a commonly used term in the title or the abstract | 1           |

|    |                      |                     |                                                    |     |
|----|----------------------|---------------------|----------------------------------------------------|-----|
| 1  | Abstract             | <a href="#">#1b</a> | Provide in the abstract an informative and         | 2   |
| 2  |                      |                     |                                                    |     |
| 3  |                      |                     |                                                    |     |
| 4  |                      |                     | balanced summary of what was done and              |     |
| 5  |                      |                     |                                                    |     |
| 6  |                      |                     | what was found                                     |     |
| 7  |                      |                     |                                                    |     |
| 8  |                      |                     |                                                    |     |
| 9  | <b>Introduction</b>  |                     |                                                    |     |
| 10 |                      |                     |                                                    |     |
| 11 |                      |                     |                                                    |     |
| 12 | Background /         | <a href="#">#2</a>  | Explain the scientific background and              | 4-5 |
| 13 |                      |                     |                                                    |     |
| 14 | rationale            |                     | rationale for the investigation being reported     |     |
| 15 |                      |                     |                                                    |     |
| 16 |                      |                     |                                                    |     |
| 17 | Objectives           | <a href="#">#3</a>  | State specific objectives, including any           | 5   |
| 18 |                      |                     |                                                    |     |
| 19 |                      |                     | prespecified hypotheses                            |     |
| 20 |                      |                     |                                                    |     |
| 21 |                      |                     |                                                    |     |
| 22 |                      |                     |                                                    |     |
| 23 | <b>Methods</b>       |                     |                                                    |     |
| 24 |                      |                     |                                                    |     |
| 25 |                      |                     |                                                    |     |
| 26 | Study design         | <a href="#">#4</a>  | Present key elements of study design early in      | 5   |
| 27 |                      |                     |                                                    |     |
| 28 |                      |                     | the paper                                          |     |
| 29 |                      |                     |                                                    |     |
| 30 |                      |                     |                                                    |     |
| 31 | Setting              | <a href="#">#5</a>  | Describe the setting, locations, and relevant      | 5   |
| 32 |                      |                     |                                                    |     |
| 33 |                      |                     | dates, including periods of recruitment,           |     |
| 34 |                      |                     |                                                    |     |
| 35 |                      |                     | exposure, follow-up, and data collection           |     |
| 36 |                      |                     |                                                    |     |
| 37 |                      |                     |                                                    |     |
| 38 |                      |                     |                                                    |     |
| 39 | Eligibility criteria | <a href="#">#6a</a> | Give the eligibility criteria, and the sources     | 5   |
| 40 |                      |                     |                                                    |     |
| 41 |                      |                     | and methods of selection of participants.          |     |
| 42 |                      |                     |                                                    |     |
| 43 |                      |                     |                                                    |     |
| 44 |                      | <a href="#">#7</a>  | Clearly define all outcomes, exposures,            | 5-8 |
| 45 |                      |                     |                                                    |     |
| 46 |                      |                     | predictors, potential confounders, and effect      |     |
| 47 |                      |                     |                                                    |     |
| 48 |                      |                     | modifiers. Give diagnostic criteria, if applicable |     |
| 49 |                      |                     |                                                    |     |
| 50 |                      |                     |                                                    |     |
| 51 |                      |                     |                                                    |     |
| 52 | Data sources /       | <a href="#">#8</a>  | For each variable of interest give sources of      | 5-8 |
| 53 |                      |                     |                                                    |     |
| 54 | measurement          |                     | data and details of methods of assessment          |     |
| 55 |                      |                     |                                                    |     |
| 56 |                      |                     | (measurement). Describe comparability of           |     |
| 57 |                      |                     |                                                    |     |
| 58 |                      |                     |                                                    |     |
| 59 |                      |                     |                                                    |     |
| 60 |                      |                     |                                                    |     |



assessment methods if there is more than one group. Give information separately for for exposed and unexposed groups if applicable.

|    |                        |                      |                                                                                                                               |             |
|----|------------------------|----------------------|-------------------------------------------------------------------------------------------------------------------------------|-------------|
| 1  |                        |                      |                                                                                                                               |             |
| 2  |                        |                      |                                                                                                                               |             |
| 3  |                        |                      |                                                                                                                               |             |
| 4  |                        |                      |                                                                                                                               |             |
| 5  |                        |                      |                                                                                                                               |             |
| 6  |                        |                      |                                                                                                                               |             |
| 7  |                        |                      |                                                                                                                               |             |
| 8  | Bias                   | <a href="#">#9</a>   | Describe any efforts to address potential sources of bias                                                                     | 5,7-8,16-17 |
| 9  |                        |                      |                                                                                                                               |             |
| 10 |                        |                      |                                                                                                                               |             |
| 11 |                        |                      |                                                                                                                               |             |
| 12 |                        |                      |                                                                                                                               |             |
| 13 | Study size             | <a href="#">#10</a>  | Explain how the study size was arrived at                                                                                     | 5           |
| 14 |                        |                      |                                                                                                                               |             |
| 15 |                        |                      |                                                                                                                               |             |
| 16 | Quantitative variables | <a href="#">#11</a>  | Explain how quantitative variables were handled in the analyses. If applicable, describe which groupings were chosen, and why | 5-8         |
| 17 |                        |                      |                                                                                                                               |             |
| 18 |                        |                      |                                                                                                                               |             |
| 19 |                        |                      |                                                                                                                               |             |
| 20 |                        |                      |                                                                                                                               |             |
| 21 |                        |                      |                                                                                                                               |             |
| 22 |                        |                      |                                                                                                                               |             |
| 23 |                        |                      |                                                                                                                               |             |
| 24 |                        |                      |                                                                                                                               |             |
| 25 |                        |                      |                                                                                                                               |             |
| 26 | Statistical methods    | <a href="#">#12a</a> | Describe all statistical methods, including those used to control for confounding                                             | 7-8         |
| 27 |                        |                      |                                                                                                                               |             |
| 28 |                        |                      |                                                                                                                               |             |
| 29 |                        |                      |                                                                                                                               |             |
| 30 |                        |                      |                                                                                                                               |             |
| 31 | Statistical methods    | <a href="#">#12b</a> | Describe any methods used to examine subgroups and interactions                                                               | 7-8         |
| 32 |                        |                      |                                                                                                                               |             |
| 33 |                        |                      |                                                                                                                               |             |
| 34 |                        |                      |                                                                                                                               |             |
| 35 |                        |                      |                                                                                                                               |             |
| 36 |                        |                      |                                                                                                                               |             |
| 37 | Statistical methods    | <a href="#">#12c</a> | Explain how missing data were addressed                                                                                       | 8           |
| 38 |                        |                      |                                                                                                                               |             |
| 39 |                        |                      |                                                                                                                               |             |
| 40 |                        |                      |                                                                                                                               |             |
| 41 |                        |                      |                                                                                                                               |             |
| 42 | Statistical methods    | <a href="#">#12d</a> | If applicable, describe analytical methods taking account of sampling strategy                                                | 5           |
| 43 |                        |                      |                                                                                                                               |             |
| 44 |                        |                      |                                                                                                                               |             |
| 45 |                        |                      |                                                                                                                               |             |
| 46 |                        |                      |                                                                                                                               |             |
| 47 |                        |                      |                                                                                                                               |             |
| 48 | Statistical methods    | <a href="#">#12e</a> | Describe any sensitivity analyses                                                                                             | n/a         |
| 49 |                        |                      |                                                                                                                               |             |
| 50 |                        |                      |                                                                                                                               |             |
| 51 |                        |                      |                                                                                                                               |             |
| 52 |                        |                      |                                                                                                                               |             |
| 53 | <b>Results</b>         |                      |                                                                                                                               |             |
| 54 |                        |                      |                                                                                                                               |             |
| 55 |                        |                      |                                                                                                                               |             |
| 56 |                        |                      |                                                                                                                               |             |
| 57 |                        |                      |                                                                                                                               |             |
| 58 |                        |                      |                                                                                                                               |             |
| 59 |                        |                      |                                                                                                                               |             |
| 60 |                        |                      |                                                                                                                               |             |

|    |                  |                      |                                                |                            |
|----|------------------|----------------------|------------------------------------------------|----------------------------|
| 1  | Participants     | <a href="#">#13a</a> | Report numbers of individuals at each stage    | 5                          |
| 2  |                  |                      |                                                |                            |
| 3  |                  |                      | of study—eg numbers potentially eligible,      |                            |
| 4  |                  |                      | examined for eligibility, confirmed eligible,  |                            |
| 5  |                  |                      | included in the study, completing follow-up,   |                            |
| 6  |                  |                      | and analysed. Give information separately for  |                            |
| 7  |                  |                      | for exposed and unexposed groups if            |                            |
| 8  |                  |                      | applicable.                                    |                            |
| 9  |                  |                      |                                                |                            |
| 10 |                  |                      |                                                |                            |
| 11 |                  |                      |                                                |                            |
| 12 |                  |                      |                                                |                            |
| 13 |                  |                      |                                                |                            |
| 14 |                  |                      |                                                |                            |
| 15 |                  |                      |                                                |                            |
| 16 |                  |                      |                                                |                            |
| 17 |                  |                      |                                                |                            |
| 18 | Participants     | <a href="#">#13b</a> | Give reasons for non-participation at each     | n/a With reference to      |
| 19 |                  |                      | stage                                          | ethical guidelines we did  |
| 20 |                  |                      |                                                | not ask potential          |
| 21 |                  |                      |                                                | participants to give their |
| 22 |                  |                      |                                                | reasons for non-           |
| 23 |                  |                      |                                                | participation              |
| 24 |                  |                      |                                                |                            |
| 25 |                  |                      |                                                |                            |
| 26 |                  |                      |                                                |                            |
| 27 |                  |                      |                                                |                            |
| 28 |                  |                      |                                                |                            |
| 29 |                  |                      |                                                |                            |
| 30 |                  |                      |                                                |                            |
| 31 |                  |                      |                                                |                            |
| 32 | Participants     | <a href="#">#13c</a> | Consider use of a flow diagram                 | n/a                        |
| 33 |                  |                      |                                                |                            |
| 34 |                  |                      |                                                |                            |
| 35 | Descriptive data | <a href="#">#14a</a> | Give characteristics of study participants (eg | 9-11                       |
| 36 |                  |                      | demographic, clinical, social) and information |                            |
| 37 |                  |                      | on exposures and potential confounders. Give   |                            |
| 38 |                  |                      | information separately for exposed and         |                            |
| 39 |                  |                      | unexposed groups if applicable.                |                            |
| 40 |                  |                      |                                                |                            |
| 41 |                  |                      |                                                |                            |
| 42 |                  |                      |                                                |                            |
| 43 |                  |                      |                                                |                            |
| 44 |                  |                      |                                                |                            |
| 45 |                  |                      |                                                |                            |
| 46 |                  |                      |                                                |                            |
| 47 | Descriptive data | <a href="#">#14b</a> | Indicate number of participants with missing   | 8                          |
| 48 |                  |                      | data for each variable of interest             |                            |
| 49 |                  |                      |                                                |                            |
| 50 |                  |                      |                                                |                            |
| 51 |                  |                      |                                                |                            |
| 52 |                  |                      |                                                |                            |
| 53 | Outcome data     | <a href="#">#15</a>  | Report numbers of outcome events or            | 9                          |
| 54 |                  |                      | summary measures. Give information             |                            |
| 55 |                  |                      |                                                |                            |
| 56 |                  |                      |                                                |                            |
| 57 |                  |                      |                                                |                            |
| 58 |                  |                      |                                                |                            |
| 59 |                  |                      |                                                |                            |
| 60 |                  |                      |                                                |                            |

|    |                   |                                                                     |            |
|----|-------------------|---------------------------------------------------------------------|------------|
| 1  |                   | separately for exposed and unexposed groups                         |            |
| 2  |                   |                                                                     |            |
| 3  |                   | if applicable.                                                      |            |
| 4  |                   |                                                                     |            |
| 5  |                   |                                                                     |            |
| 6  | Main results      | <a href="#">#16a</a> Give unadjusted estimates and, if applicable,  | 8,14       |
| 7  |                   |                                                                     |            |
| 8  |                   | confounder-adjusted estimates and their                             |            |
| 9  |                   |                                                                     |            |
| 10 |                   | precision (eg, 95% confidence interval). Make                       |            |
| 11 |                   |                                                                     |            |
| 12 |                   | clear which confounders were adjusted for                           |            |
| 13 |                   |                                                                     |            |
| 14 |                   | and why they were included                                          |            |
| 15 |                   |                                                                     |            |
| 16 |                   |                                                                     |            |
| 17 |                   |                                                                     |            |
| 18 | Main results      | <a href="#">#16b</a> Report category boundaries when continuous     | 8,10-11,14 |
| 19 |                   |                                                                     |            |
| 20 |                   | variables were categorized                                          |            |
| 21 |                   |                                                                     |            |
| 22 |                   |                                                                     |            |
| 23 | Main results      | <a href="#">#16c</a> If relevant, consider translating estimates of | n/a        |
| 24 |                   |                                                                     |            |
| 25 |                   | relative risk into absolute risk for a meaningful                   |            |
| 26 |                   |                                                                     |            |
| 27 |                   | time period                                                         |            |
| 28 |                   |                                                                     |            |
| 29 |                   |                                                                     |            |
| 30 |                   |                                                                     |            |
| 31 | Other analyses    | <a href="#">#17</a> Report other analyses done—e.g., analyses of    | 12-14      |
| 32 |                   |                                                                     |            |
| 33 |                   | subgroups and interactions, and sensitivity                         |            |
| 34 |                   |                                                                     |            |
| 35 |                   | analyses                                                            |            |
| 36 |                   |                                                                     |            |
| 37 |                   |                                                                     |            |
| 38 | <b>Discussion</b> |                                                                     |            |
| 39 |                   |                                                                     |            |
| 40 |                   |                                                                     |            |
| 41 |                   |                                                                     |            |
| 42 | Key results       | <a href="#">#18</a> Summarise key results with reference to study   | 15         |
| 43 |                   |                                                                     |            |
| 44 |                   | objectives                                                          |            |
| 45 |                   |                                                                     |            |
| 46 |                   |                                                                     |            |
| 47 | Limitations       | <a href="#">#19</a> Discuss limitations of the study, taking into   | 16-17      |
| 48 |                   |                                                                     |            |
| 49 |                   | account sources of potential bias or                                |            |
| 50 |                   |                                                                     |            |
| 51 |                   | imprecision. Discuss both direction and                             |            |
| 52 |                   |                                                                     |            |
| 53 |                   | magnitude of any potential bias.                                    |            |
| 54 |                   |                                                                     |            |
| 55 |                   |                                                                     |            |
| 56 |                   |                                                                     |            |
| 57 |                   |                                                                     |            |
| 58 |                   |                                                                     |            |
| 59 |                   |                                                                     |            |
| 60 |                   |                                                                     |            |

|    |                    |                     |                                                   |       |
|----|--------------------|---------------------|---------------------------------------------------|-------|
| 1  | Interpretation     | <a href="#">#20</a> | Give a cautious overall interpretation            | 15-18 |
| 2  |                    |                     |                                                   |       |
| 3  |                    |                     | considering objectives, limitations, multiplicity |       |
| 4  |                    |                     | of analyses, results from similar studies, and    |       |
| 5  |                    |                     | other relevant evidence.                          |       |
| 6  |                    |                     |                                                   |       |
| 7  |                    |                     |                                                   |       |
| 8  |                    |                     |                                                   |       |
| 9  |                    |                     |                                                   |       |
| 10 |                    |                     |                                                   |       |
| 11 | Generalisability   | <a href="#">#21</a> | Discuss the generalisability (external validity)  | 16-17 |
| 12 |                    |                     |                                                   |       |
| 13 |                    |                     | of the study results                              |       |
| 14 |                    |                     |                                                   |       |
| 15 |                    |                     |                                                   |       |
| 16 | <b>Other</b>       |                     |                                                   |       |
| 17 |                    |                     |                                                   |       |
| 18 | <b>Information</b> |                     |                                                   |       |
| 19 |                    |                     |                                                   |       |
| 20 |                    |                     |                                                   |       |
| 21 |                    |                     |                                                   |       |
| 22 | Funding            | <a href="#">#22</a> | Give the source of funding and the role of the    | 19    |
| 23 |                    |                     |                                                   |       |
| 24 |                    |                     | funders for the present study and, if             |       |
| 25 |                    |                     | applicable, for the original study on which the   |       |
| 26 |                    |                     | present article is based                          |       |
| 27 |                    |                     |                                                   |       |
| 28 |                    |                     |                                                   |       |
| 29 |                    |                     |                                                   |       |
| 30 |                    |                     |                                                   |       |

## Notes:

- 35 • 9: 5,7-8,16-17
- 36
- 37
- 38 • 13b: n/a With reference to ethical guidelines we did not ask potential participants to give their
- 39 reasons for non-participation The STROBE checklist is distributed under the terms of the
- 40 Creative Commons Attribution License CC-BY. This checklist was completed on 25. June 2020
- 41 using <https://www.goodreports.org/>, a tool made by the [EQUATOR Network](#) in collaboration with
- 42 [Penelope.ai](#)
- 43
- 44
- 45
- 46
- 47
- 48
- 49
- 50
- 51
- 52
- 53
- 54
- 55
- 56
- 57
- 58
- 59
- 60
