# Supplementary material for: New Diabetes Questionnaire to add patients’ perspectives to diabetes care for adults with type 1 and type 2 diabetes: nationwide cross-sectional study of construct validity assessing associations with generic health-related quality of life and clinical variables
Source: PubMed Central journal article supplement — BMJ Open. 2020 Nov 17;10(11):e038966. doi: 10.1136/bmjopen-2020-038966 (PMC7674110; doi:10.1136/bmjopen-2020-038966), 2020-11-17
Supplement: bmjopen-2020-038966supp001.pdf [file bmjopen-2020-038966supp001.pdf]

## SUPPLEMENTARY MATERIAL

To the article titled

New diabetes questionnaire to add patients' perspectives to diabetes care for adults with type 1 and type 2 diabetes – Nationwide cross-sectional study of construct validity assessing associations with generic health-related quality of life and clinical variables

By

Maria Svedbo Engström; Janeth Leksell; Unn-Britt Johansson; Sixten Borg, Bo Palaszewski; Stefan Franzén; Soffia Gudbjörnsdottir; Katarina Eeg-Olofsson

Submitted to *BMJ Open*

### Supplementary figures

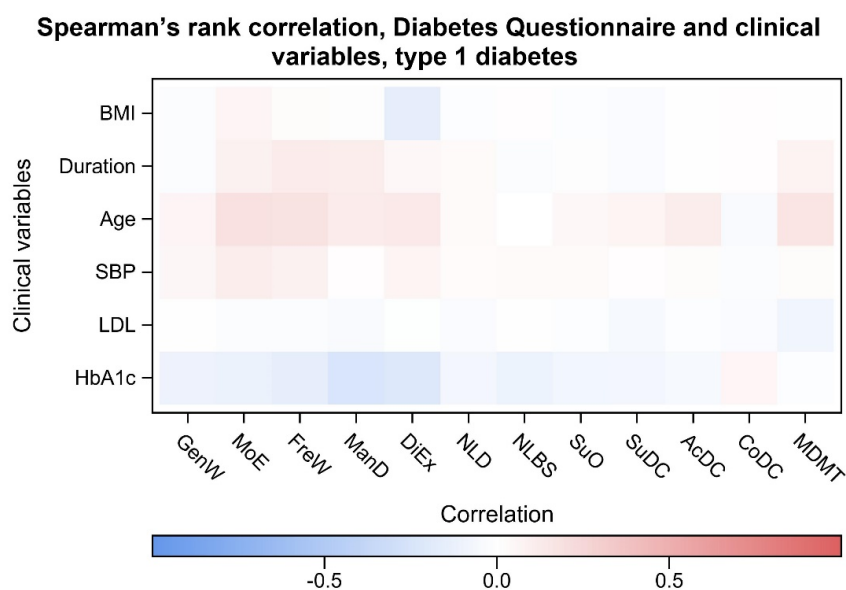

**Fig. S1.** Spearman's rank correlation between the Diabetes Questionnaire scales and clinical variables in type 1 diabetes

Diabetes Questionnaire scales: GenW: General Wellbeing; MoE: Mood and Energy; FreW: Free of Worries about blood sugar; ManD: Capabilities to Manage your Diabetes; DiEx: Diet and Exercise; NLD: Not Limited by Diabetes; NLBS: Not Limited by Blood Sugar; SuO: Support from Others; SuDC: Support from Diabetes Care; AcDC: Access to Diabetes Care; CoDC: Continuity in Diabetes Care; MDMT: Medical Devices and Medical Treatment.

Clinical variables: BMI: body mass index, SBP: systolic blood pressure, LDL: LDL cholesterol, HbA<sub>1c</sub>: glycated haemoglobin level.

Svedbo Engström et al. A new diabetes questionnaire to add patients' perspectives to diabetes care for adults with type 1 and type 2 diabetes – A nationwide cross-sectional study of associations with generic health-related quality of life and clinical variables

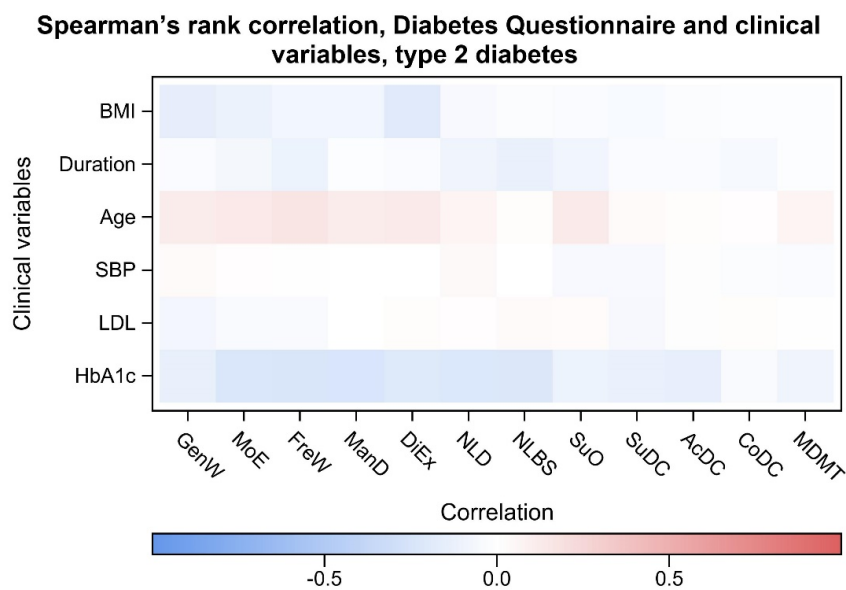

**Fig. S2.** Spearman's rank correlation between the Diabetes Questionnaire scales and clinical variables in type 2 diabetes

Diabetes Questionnaire scales: GenW: General Wellbeing; MoE: Mood and Energy; FreW: Free of Worries about blood sugar; ManD: Capabilities to Manage your Diabetes; DiEx: Diet and Exercise; NLD: Not Limited by Diabetes; NLBS: Not Limited by Blood Sugar; SuO: Support from Others; SuDC: Support from Diabetes Care; AcDC: Access to Diabetes Care; CoDC: Continuity in Diabetes Care; MDMT: Medical Devices and Medical Treatment.

Clinical variables: BMI: body mass index, SBP: systolic blood pressure, LDL: LDL cholesterol, HbA<sub>1c</sub>: glycated haemoglobin level.

Svedbo Engström et al. A new diabetes questionnaire to add patients' perspectives to diabetes care for adults with type 1 and type 2 diabetes – A nationwide cross-sectional study of associations with generic health-related quality of life and clinical variables

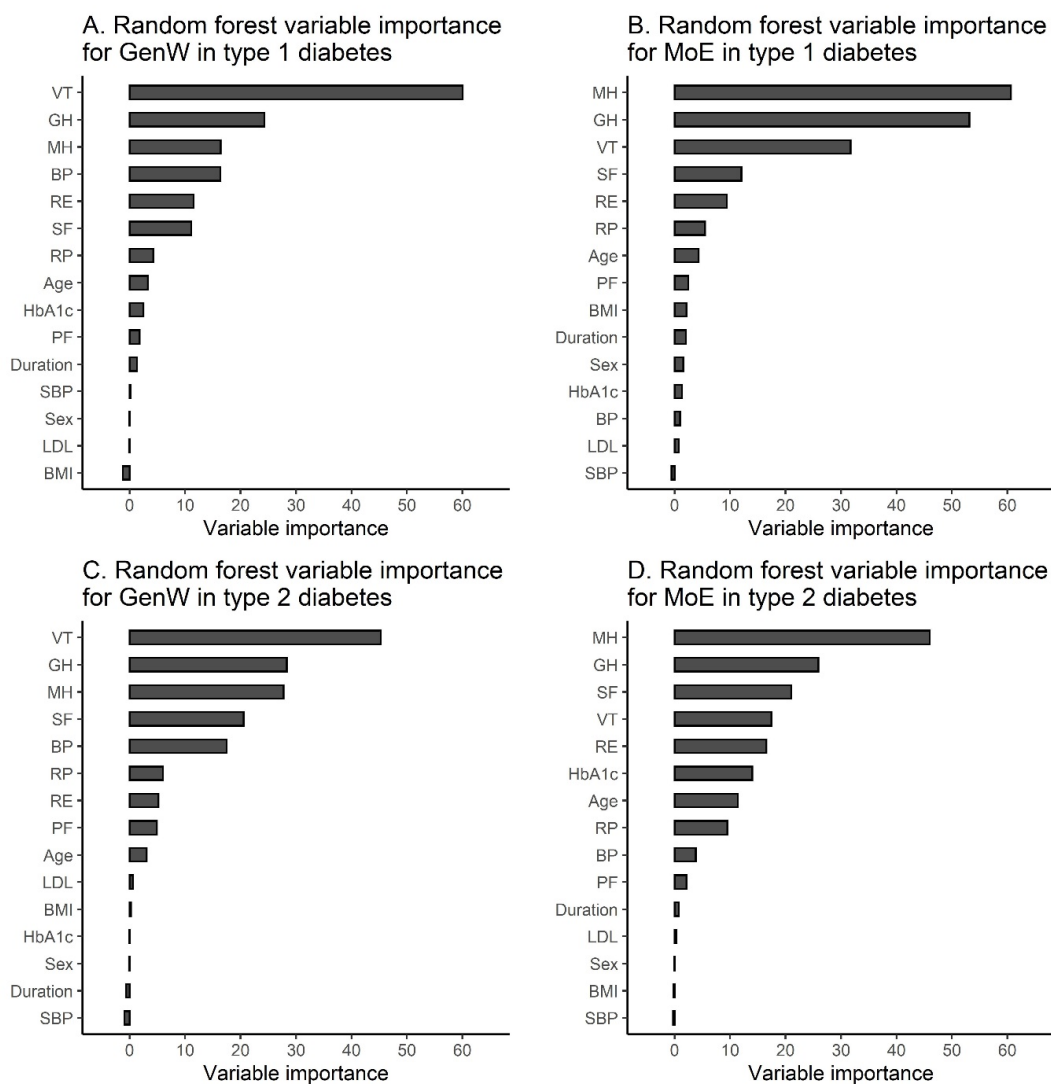

**Fig. S3.** Variable importance of clinical variables and the SF-36v2 domains as predictors of the Diabetes Questionnaire scales GenW (General Wellbeing) and MoE (Mood and Energy) in type 1 (A and B) and type 2 diabetes (C and D)

Clinical variables: BMI: body mass index, SBP: systolic blood pressure, LDL: LDL cholesterol, HbA<sub>1c</sub>: glycated haemoglobin level.

SF-36v2 domains: PF: physical functioning; RP: role-physical; BP: bodily pain; GH: general health; VT: vitality; SF: social functioning; RE: role-emotional; MH: mental health.

Svedbo Engström et al. A new diabetes questionnaire to add patients' perspectives to diabetes care for adults with type 1 and type 2 diabetes – A nationwide cross-sectional study of associations with generic health-related quality of life and clinical variables

## Supplementary tables

**Table S1.** Crude means and standard deviations for the Diabetes Questionnaire scales and the SF-36v2 domains for participants with type 1 diabetes and those with type 2 diabetes

| Diabetes Questionnaire scale | Type 1 diabetes | Type 2 diabetes | p-value | Standardized mean difference, SMD |
|------------------------------|-----------------|-----------------|---------|-----------------------------------|
| GenW                         | 59.69 (23.81)   | 63.76 (24.71)   | <0.001  | 0.168                             |
| MoE                          | 64.07 (23.60)   | 75.19 (22.25)   | <0.001  | 0.485                             |
| FreW                         | 54.89 (21.91)   | 69.03 (22.29)   | <0.001  | 0.640                             |
| ManD                         | 63.20 (20.16)   | 70.48 (19.89)   | <0.001  | 0.364                             |
| DiEx                         | 56.66 (24.36)   | 58.88 (24.08)   | 0.018   | 0.092                             |
| NLD                          | 75.33 (23.47)   | 84.14 (21.70)   | <0.001  | 0.390                             |
| NLBS                         | 69.97 (26.94)   | 80.94 (26.84)   | <0.001  | 0.408                             |
| SuO                          | 62.32 (23.46)   | 66.26 (23.71)   | <0.001  | 0.167                             |
| SuDC                         | 78.35 (20.29)   | 77.89 (22.61)   | 0.574   | 0.022                             |
| AcDC                         | 67.80 (20.73)   | 71.31 (22.61)   | <0.001  | 0.162                             |
| CoDC                         | 80.04 (23.29)   | 71.42 (27.39)   | <0.001  | 0.339                             |
| MDMT                         | 75.40 (21.78)   | 80.47 (18.39)   | <0.001  | 0.252                             |

Diabetes questionnaire scales: GenW: General Wellbeing; MoE: Mood and Energy; FreW: Free of Worries about blood sugar; ManD: Capabilities to Manage your Diabetes; DiEx: Diet and Exercise; NLD: Not Limited by Diabetes; NLBS: Not Limited by Blood Sugar; SuO: Support from Others; SuDC: Support from Diabetes Care; AcDC: Access to Diabetes Care; CoDC: Continuity in Diabetes Care; MDMT: Medical Devices and Medical Treatment.

Svedbo Engström et al. A new diabetes questionnaire to add patients' perspectives to diabetes care for adults with type 1 and type 2 diabetes – A nationwide cross-sectional study of associations with generic health-related quality of life and clinical variables

**Table S2.** Clinical and demographic characteristics for non-responders separated for type 1 and type 2 diabetes

| <b>Variable</b>                    | <b>Type 1 diabetes (n=1106)</b> | <b>Type 2 diabetes (n=1116)</b> |
|------------------------------------|---------------------------------|---------------------------------|
| Men, %                             | 60.7                            | 58.1                            |
| Age, years (SD)                    | 41.2 (15.5)                     | 62.8 (10.9)                     |
| Diabetes duration, years (SD)      | 21.7 (14.0)                     | 8.7 (7.0)                       |
| HbA <sub>1c</sub> , mmol/mol (SD)  | 65.2 (15.1)                     | 54.7 (14.3)                     |
| BMI, kg/m <sup>2</sup> (SD)        | 26.1 (4.6)                      | 30.9 (5.9)                      |
| Systolic blood pressure, mmHg (SD) | 126.1 (14.0)                    | 134.7 (15.8)                    |
| Antihypertensive medication, %     | 34.6                            | 77.5                            |
| LDL-cholesterol, mmol/L (SD)       | 2.53 (0.79)                     | 2.64 (0.93)                     |
| Lipid-lowering medication, %       | 37.1                            | 60.5                            |
| Micro-albuminuria, %               | 11.4                            | 18.4                            |
| Macro-albuminuria, %               | 5.6                             | 5.0                             |
| Retinopathy, %                     | 66.2                            | 30.5                            |
| Smoker, %                          | 15.7                            | 18.4                            |
| Physical activity, daily, %        | 20.3                            | 27.1                            |
| <b>Diabetes treatment</b>          |                                 |                                 |
| Diet alone, %                      | -                               | 20.1                            |
| Oral hypoglycaemic agent alone, %  | -                               | 52.5                            |
| Insulin alone, %                   | 97.2                            | 8.1                             |
| Insulin and oral agent, %          | 2.3                             | 16.7                            |
| Insulin pump users, %              | 19.9                            | -                               |

The descriptive statistics are presented as the means and standard deviations (SD) for continuous variables or number and percentages for categorical variables.

Svedbo Engström et al. A new diabetes questionnaire to add patients' perspectives to diabetes care for adults with type 1 and type 2 diabetes – A nationwide cross-sectional study of associations with generic health-related quality of life and clinical variables

**Table S3.** Spearman's rank correlations with p-values between the Diabetes Questionnaire scale scores and clinical variables in type 1 diabetes

| Clinical variable | GenW                  | MoE                   | FreW                  | ManD                  | DiEx                  | NLD               | NLBS                  | SuO               | SuDC              | AcDC                 | CoDC              | MDMT                 |
|-------------------|-----------------------|-----------------------|-----------------------|-----------------------|-----------------------|-------------------|-----------------------|-------------------|-------------------|----------------------|-------------------|----------------------|
| Age               | 0.06<br>(0.0184)      | 0.19<br>( $<.0001$ )  | 0.18<br>( $<.0001$ )  | 0.13<br>( $<.0001$ )  | 0.14<br>( $<.0001$ )  | 0.03<br>(0.2050)  | 0.01<br>(0.8445)      | 0.05<br>(0.0875)  | 0.07<br>(0.0093)  | 0.11<br>( $<.0001$ ) | -0.04<br>(0.1635) | 0.17<br>( $<.0001$ ) |
| Diabetes duration | -0.02<br>(0.4673)     | 0.09<br>(0.0006)      | 0.13<br>( $<.0001$ )  | 0.11<br>( $<.0001$ )  | 0.05<br>(0.0456)      | 0.04<br>(0.1981)  | -0.02<br>(0.4678)     | -0.01<br>(0.6936) | -0.03<br>(0.2024) | -0.00<br>(0.9883)    | 0.01<br>(0.6045)  | 0.08<br>(0.0027)     |
| HbA <sub>1c</sub> | -0.12<br>( $<.0001$ ) | -0.12<br>( $<.0001$ ) | -0.16<br>( $<.0001$ ) | -0.25<br>( $<.0001$ ) | -0.21<br>( $<.0001$ ) | -0.07<br>(0.0073) | -0.12<br>( $<.0001$ ) | -0.08<br>(0.0101) | -0.07<br>(0.0070) | -0.05<br>(0.0542)    | 0.06<br>(0.0356)  | -0.02<br>(0.5485)    |
| BMI               | -0.02<br>(0.4601)     | 0.07<br>(0.0151)      | 0.03<br>(0.2763)      | -0.01<br>(0.6738)     | -0.15<br>( $<.0001$ ) | -0.01<br>(0.6239) | 0.02<br>(0.5767)      | -0.01<br>(0.6620) | -0.03<br>(0.2568) | -0.00<br>(0.9175)    | 0.02<br>(0.5998)  | 0.01<br>(0.7292)     |
| SBP               | 0.06<br>(0.0231)      | 0.12<br>( $<.0001$ )  | 0.09<br>(0.0005)      | 0.02<br>(0.5036)      | 0.07<br>(0.0072)      | 0.03<br>(0.3393)  | 0.03<br>(0.2152)      | 0.03<br>(0.3092)  | 0.01<br>(0.6002)  | 0.03<br>(0.2773)     | -0.03<br>(0.3239) | 0.03<br>(0.2610)     |
| LDL               | -0.00<br>(0.9452)     | -0.02<br>(0.4805)     | -0.02<br>(0.4380)     | -0.04<br>(0.1549)     | -0.01<br>(0.8077)     | -0.03<br>(0.2406) | -0.00<br>(0.9780)     | -0.02<br>(0.5905) | -0.06<br>(0.0474) | -0.02<br>(0.5275)    | -0.03<br>(0.2873) | -0.09<br>(0.0023)    |

Diabetes questionnaire scales: GenW: General Wellbeing; MoE: Mood and Energy; FreW: Free of Worries about blood sugar; ManD: Capabilities to Manage your Diabetes; DiEx: Diet and Exercise; NLD: Not Limited by Diabetes; NLBS: Not Limited by Blood Sugar; SuO: Support from Others; SuDC: Support from Diabetes Care; AcDC: Access to Diabetes Care; CoDC: Continuity in Diabetes Care; MDMT: Medical Devices and Medical Treatment.  
Clinical variables: BMI: body mass index; SBP: systolic blood pressure; LDL: LDL cholesterol; HbA<sub>1c</sub>: glycated haemoglobin level.

Svedbo Engström et al. A new diabetes questionnaire to add patients' perspectives to diabetes care for adults with type 1 and type 2 diabetes – A nationwide cross-sectional study of associations with generic health-related quality of life and clinical variables

**Table S4.** Spearman's rank correlations with p-values between the Diabetes Questionnaire scale scores and clinical variables in type 2 diabetes

| Clinical variable | GenW                  | MoE                   | FreW                  | ManD                  | DiEx                  | NLD                   | NLBS                  | SuO               | SuDC                  | AcDC                  | CoDC              | MDMT              |
|-------------------|-----------------------|-----------------------|-----------------------|-----------------------|-----------------------|-----------------------|-----------------------|-------------------|-----------------------|-----------------------|-------------------|-------------------|
| Age               | 0.12<br>( $<.0001$ )  | 0.14<br>( $<.0001$ )  | 0.16<br>( $<.0001$ )  | 0.12<br>( $<.0001$ )  | 0.14<br>( $<.0001$ )  | 0.07<br>(0.0061)      | 0.02<br>(0.3646)      | 0.13<br>(0.0002)  | 0.04<br>(0.1926)      | 0.02<br>(0.3657)      | 0.01<br>(0.6265)  | 0.07<br>(0.0089)  |
| Diabetes duration | -0.03<br>(0.2226)     | -0.07<br>(0.0202)     | -0.11<br>( $<.0001$ ) | -0.02<br>(0.5662)     | -0.04<br>(0.1868)     | -0.10<br>(0.0007)     | -0.13<br>( $<.0001$ ) | -0.09<br>(0.0184) | -0.04<br>(0.2043)     | -0.03<br>(0.2353)     | -0.06<br>(0.0570) | -0.01<br>(0.6150) |
| HbA <sub>1c</sub> | -0.14<br>( $<.0001$ ) | -0.24<br>( $<.0001$ ) | -0.24<br>( $<.0001$ ) | -0.24<br>( $<.0001$ ) | -0.21<br>( $<.0001$ ) | -0.23<br>( $<.0001$ ) | -0.22<br>( $<.0001$ ) | -0.11<br>(0.0015) | -0.13<br>( $<.0001$ ) | -0.15<br>( $<.0001$ ) | -0.04<br>(0.1270) | -0.09<br>(0.0012) |
| BMI               | -0.15<br>( $<.0001$ ) | -0.12<br>( $<.0001$ ) | -0.08<br>(0.0046)     | -0.08<br>(0.0037)     | -0.20<br>( $<.0001$ ) | -0.05<br>(0.0752)     | -0.03<br>(0.3242)     | -0.03<br>(0.4203) | -0.05<br>(0.0854)     | -0.03<br>(0.3238)     | -0.01<br>(0.6580) | -0.02<br>(0.5507) |
| SBP               | 0.03<br>(0.2195)      | 0.02<br>(0.5649)      | 0.01<br>(0.7496)      | 0.00<br>(0.9131)      | 0.00<br>(0.8954)      | 0.04<br>(0.1082)      | 0.01<br>(0.8433)      | -0.05<br>(0.1746) | -0.05<br>(0.0781)     | -0.01<br>(0.6444)     | -0.02<br>(0.4327) | -0.03<br>(0.2736) |
| LDL               | -0.07<br>(0.0151)     | -0.04<br>(0.1773)     | -0.04<br>(0.1310)     | 0.00<br>(0.9813)      | 0.02<br>(0.4793)      | 0.02<br>(0.5751)      | 0.04<br>(0.2250)      | 0.03<br>(0.4554)  | -0.06<br>(0.0504)     | -0.01<br>(0.7171)     | 0.02<br>(0.5061)  | 0.01<br>(0.8070)  |

Diabetes questionnaire scales: GenW: General Wellbeing; MoE: Mood and Energy; FreW: Free of Worries about blood sugar; ManD: Capabilities to Manage your Diabetes; DiEx: Diet and Exercise; NLD: Not Limited by Diabetes; NLBS: Not Limited by Blood Sugar; SuO: Support from Others; SuDC: Support from Diabetes Care; AcDC: Access to Diabetes Care; CoDC: Continuity in Diabetes Care; MDMT: Medical Devices and Medical Treatment.  
Clinical variables: BMI: body mass index; SBP: systolic blood pressure; LDL: LDL cholesterol; HbA<sub>1c</sub>: glycated haemoglobin level.

Svedbo Engström et al. A new diabetes questionnaire to add patients' perspectives to diabetes care for adults with type 1 and type 2 diabetes – A nationwide cross-sectional study of associations with generic health-related quality of life and clinical variables

**Table S5.** Spearman's rank correlations with p-values between the Diabetes Questionnaire scales and the SF-36v2 domains in type 1 diabetes

| Diabetes Questionnaire scale | SF-36v2 domain   |                  |                  |                  |                  |                  |                  |                  |
|------------------------------|------------------|------------------|------------------|------------------|------------------|------------------|------------------|------------------|
|                              | PF               | RP               | BP               | GH               | VT               | RF               | SF               | MH               |
| GenW                         | 0.33<br>(<.0001) | 0.43<br>(<.0001) | 0.43<br>(<.0001) | 0.56<br>(<.0001) | 0.60<br>(<.0001) | 0.43<br>(<.0001) | 0.48<br>(<.0001) | 0.53<br>(<.0001) |
| MoE                          | 0.23<br>(<.0001) | 0.40<br>(<.0001) | 0.30<br>(<.0001) | 0.55<br>(<.0001) | 0.57<br>(<.0001) | 0.46<br>(<.0001) | 0.52<br>(<.0001) | 0.60<br>(<.0001) |
| FreW                         | 0.17<br>(<.0001) | 0.29<br>(<.0001) | 0.21<br>(<.0001) | 0.46<br>(<.0001) | 0.40<br>(<.0001) | 0.31<br>(<.0001) | 0.38<br>(<.0001) | 0.41<br>(<.0001) |
| ManD                         | 0.18<br>(<.0001) | 0.28<br>(<.0001) | 0.20<br>(<.0001) | 0.47<br>(<.0001) | 0.44<br>(<.0001) | 0.29<br>(<.0001) | 0.37<br>(<.0001) | 0.41<br>(<.0001) |
| DiEx                         | 0.26<br>(<.0001) | 0.28<br>(<.0001) | 0.23<br>(<.0001) | 0.45<br>(<.0001) | 0.51<br>(<.0001) | 0.32<br>(<.0001) | 0.35<br>(<.0001) | 0.39<br>(<.0001) |
| NLD                          | 0.29<br>(<.0001) | 0.37<br>(<.0001) | 0.24<br>(<.0001) | 0.44<br>(<.0001) | 0.34<br>(<.0001) | 0.37<br>(<.0001) | 0.42<br>(<.0001) | 0.38<br>(<.0001) |
| NLBS                         | 0.31<br>(<.0001) | 0.39<br>(<.0001) | 0.27<br>(<.0001) | 0.43<br>(<.0001) | 0.37<br>(<.0001) | 0.35<br>(<.0001) | 0.41<br>(<.0001) | 0.36<br>(<.0001) |
| SuO                          | 0.10<br>(0.0017) | 0.15<br>(<.0001) | 0.14<br>(<.0001) | 0.29<br>(<.0001) | 0.30<br>(<.0001) | 0.23<br>(<.0001) | 0.29<br>(<.0001) | 0.32<br>(<.0001) |
| SuDC                         | 0.15<br>(<.0001) | 0.22<br>(<.0001) | 0.16<br>(<.0001) | 0.31<br>(<.0001) | 0.29<br>(<.0001) | 0.23<br>(<.0001) | 0.27<br>(<.0001) | 0.29<br>(<.0001) |
| AcDC                         | 0.13<br>(<.0001) | 0.20<br>(<.0001) | 0.15<br>(<.0001) | 0.30<br>(<.0001) | 0.28<br>(<.0001) | 0.23<br>(<.0001) | 0.26<br>(<.0001) | 0.31<br>(<.0001) |
| CoDC                         | 0.01<br>(0.8176) | 0.03<br>(0.3182) | 0.03<br>(0.3309) | 0.08<br>(0.0027) | 0.02<br>(0.3822) | 0.06<br>(0.0375) | 0.06<br>(0.0297) | 0.06<br>(0.0335) |
| MDMT                         | 0.06<br>(0.0240) | 0.14<br>(<.0001) | 0.09<br>(0.0006) | 0.30<br>(<.0001) | 0.27<br>(<.0001) | 0.19<br>(<.0001) | 0.26<br>(<.0001) | 0.30<br>(<.0001) |

Diabetes Questionnaire scales: GenW: General Wellbeing; MoE: Mood and Energy; FreW: Free of Worries about blood sugar; ManD: Capabilities to Manage your Diabetes; DiEx: Diet and Exercise; NLD: Not Limited by Diabetes; NLBS: Not Limited by Blood Sugar; SuO: Support from Others; SuDC: Support from Diabetes Care; AcDC: Access to Diabetes Care; CoDC: Continuity in Diabetes Care; MDMT: Medical Devices and Medical Treatment.

SF-36v2 domains: PF: physical functioning; RP: role-physical; BP: bodily pain; GH: general health; VT: vitality; SF: social functioning; RE: role-emotional; MH: mental health.



Svedbo Engström et al. A new diabetes questionnaire to add patients' perspectives to diabetes care for adults with type 1 and type 2 diabetes – A nationwide cross-sectional study of associations with generic health-related quality of life and clinical variables

**Table S6.** Spearman's rank correlations with p-values between the Diabetes Questionnaire scales and the SF-36v2 domains in type 2 diabetes

| Diabetes Questionnaire scale | SF-36v2 domain   |                  |                  |                  |                  |                  |                  |                  |
|------------------------------|------------------|------------------|------------------|------------------|------------------|------------------|------------------|------------------|
|                              | PF               | RP               | BP               | GH               | VT               | RF               | SF               | MH               |
| GenW                         | 0.39<br>(<.0001) | 0.44<br>(<.0001) | 0.48<br>(<.0001) | 0.56<br>(<.0001) | 0.60<br>(<.0001) | 0.44<br>(<.0001) | 0.51<br>(<.0001) | 0.53<br>(<.0001) |
| MoE                          | 0.41<br>(<.0001) | 0.45<br>(<.0001) | 0.42<br>(<.0001) | 0.57<br>(<.0001) | 0.58<br>(<.0001) | 0.51<br>(<.0001) | 0.54<br>(<.0001) | 0.60<br>(<.0001) |
| FreW                         | 0.28<br>(<.0001) | 0.35<br>(<.0001) | 0.34<br>(<.0001) | 0.47<br>(<.0001) | 0.42<br>(<.0001) | 0.38<br>(<.0001) | 0.40<br>(<.0001) | 0.43<br>(<.0001) |
| ManD                         | 0.26<br>(<.0001) | 0.32<br>(<.0001) | 0.28<br>(<.0001) | 0.44<br>(<.0001) | 0.45<br>(<.0001) | 0.34<br>(<.0001) | 0.37<br>(<.0001) | 0.42<br>(<.0001) |
| DiEx                         | 0.32<br>(<.0001) | 0.33<br>(<.0001) | 0.36<br>(<.0001) | 0.48<br>(<.0001) | 0.51<br>(<.0001) | 0.30<br>(<.0001) | 0.36<br>(<.0001) | 0.38<br>(<.0001) |
| NLD                          | 0.38<br>(<.0001) | 0.44<br>(<.0001) | 0.34<br>(<.0001) | 0.46<br>(<.0001) | 0.43<br>(<.0001) | 0.45<br>(<.0001) | 0.47<br>(<.0001) | 0.43<br>(<.0001) |
| NLBS                         | 0.34<br>(<.0001) | 0.40<br>(<.0001) | 0.31<br>(<.0001) | 0.40<br>(<.0001) | 0.38<br>(<.0001) | 0.44<br>(<.0001) | 0.46<br>(<.0001) | 0.42<br>(<.0001) |
| SuO                          | 0.14<br>(0.0001) | 0.19<br>(<.0001) | 0.25<br>(<.0001) | 0.31<br>(<.0001) | 0.32<br>(<.0001) | 0.20<br>(<.0001) | 0.26<br>(<.0001) | 0.32<br>(<.0001) |
| SuDC                         | 0.14<br>(<.0001) | 0.21<br>(<.0001) | 0.21<br>(<.0001) | 0.26<br>(<.0001) | 0.25<br>(<.0001) | 0.21<br>(<.0001) | 0.26<br>(<.0001) | 0.28<br>(<.0001) |
| AcDC                         | 0.22<br>(<.0001) | 0.26<br>(<.0001) | 0.28<br>(<.0001) | 0.32<br>(<.0001) | 0.31<br>(<.0001) | 0.26<br>(<.0001) | 0.29<br>(<.0001) | 0.32<br>(<.0001) |
| CoDC                         | 0.07<br>(0.0130) | 0.10<br>(0.0006) | 0.11<br>(0.0001) | 0.16<br>(<.0001) | 0.13<br>(<.0001) | 0.11<br>(0.0002) | 0.13<br>(<.0001) | 0.14<br>(<.0001) |
| MDMT                         | 0.13<br>(<.0001) | 0.20<br>(<.0001) | 0.18<br>(<.0001) | 0.24<br>(<.0001) | 0.24<br>(<.0001) | 0.22<br>(<.0001) | 0.26<br>(<.0001) | 0.28<br>(<.0001) |

Diabetes Questionnaire scales: GenW: General Wellbeing; MoE: Mood and Energy; FreW: Free of Worries about blood sugar; ManD: Capabilities to Manage your Diabetes; DiEx: Diet and Exercise; NLD: Not Limited by Diabetes; NLBS: Not Limited by Blood Sugar; SuO: Support from Others; SuDC: Support from Diabetes Care; AcDC: Access to Diabetes Care; CoDC: Continuity in Diabetes Care; MDMT: Medical Devices and Medical Treatment.

SF-36v2 domains: PF: physical functioning; RP: role-physical; BP: bodily pain; GH: general health; VT: vitality; SF: social functioning; RE: role-emotional; MH: mental health.

Svedbo Engström et al. A new diabetes questionnaire to add patients' perspectives to diabetes care for adults with type 1 and type 2 diabetes – A nationwide cross-sectional study of associations with generic health-related quality of life and clinical variables

**Table S7.** Least square mean estimates and 95% confidence intervals for the Diabetes Questionnaire scales in three glycated haemoglobin (HbA<sub>1c</sub>) groups for type 1 and type 2 diabetes

| Diabetes Questionnaire scale | Type 1 diabetes                |                                  |                                |                                |                                  |                                | Type 2 diabetes                |                                  |                                |                                |                                  |                                |
|------------------------------|--------------------------------|----------------------------------|--------------------------------|--------------------------------|----------------------------------|--------------------------------|--------------------------------|----------------------------------|--------------------------------|--------------------------------|----------------------------------|--------------------------------|
|                              | Unadjusted analysis            |                                  |                                | Adjusted analysis              |                                  |                                | Unadjusted analysis            |                                  |                                | Adjusted analysis              |                                  |                                |
|                              | HbA <sub>1c</sub> <52 mmol/mol | HbA <sub>1c</sub> 52-69 mmol/mol | HbA <sub>1c</sub> ≥70 mmol/mol | HbA <sub>1c</sub> <52 mmol/mol | HbA <sub>1c</sub> 52-69 mmol/mol | HbA <sub>1c</sub> ≥70 mmol/mol | HbA <sub>1c</sub> <52 mmol/mol | HbA <sub>1c</sub> 52-69 mmol/mol | HbA <sub>1c</sub> ≥70 mmol/mol | HbA <sub>1c</sub> <52 mmol/mol | HbA <sub>1c</sub> 52-69 mmol/mol | HbA <sub>1c</sub> ≥70 mmol/mol |
| GenW                         | 64.33<br>(63.46-65.20)         | 59.27<br>(58.74-59.79)           | 56.34<br>(55.49-57.19)         | 51.11<br>(49.14-53.07)         | 47.23<br>(45.44-49.01)           | 45.66<br>(43.80-47.53)         | 65.97<br>(65.41-66.54)         | 62.92<br>(62.24-63.60)           | 54.26<br>(52.90-55.62)         | 63.63<br>(62.10-65.15)         | 62.81<br>(61.29-64.32)           | 56.81<br>(54.85-58.78)         |
| MoE                          | 67.15<br>(66.29-68.01)         | 65.14<br>(64.62-65.66)           | 58.32<br>(57.48-59.16)         | 57.77<br>(55.87-59.66)         | 56.14<br>(54.41-57.86)           | 49.75<br>(47.96-51.54)         | 79.24<br>(78.74-79.74)         | 72.75<br>(72.15-73.35)           | 61.02<br>(59.80-62.25)         | 77.12<br>(75.78-78.46)         | 72.23<br>(70.91-73.56)           | 60.73<br>(58.99-62.46)         |
| FreW                         | 58.21<br>(57.41-59.01)         | 56.09<br>(55.61-56.58)           | 48.72<br>(47.96-49.49)         | 55.28<br>(53.51-57.05)         | 52.22<br>(50.61-53.82)           | 46.09<br>(44.42-47.75)         | 73.07<br>(72.57-73.57)         | 66.72<br>(66.12-67.32)           | 54.82<br>(53.62-56.03)         | 70.39<br>(69.03-71.75)         | 65.51<br>(64.16-66.86)           | 54.66<br>(52.90-56.42)         |
| ManD                         | 70.05<br>(69.33-70.78)         | 63.88<br>(63.45-64.32)           | 55.09<br>(54.40-55.79)         | 64.84<br>(63.20-66.47)         | 59.71<br>(58.23-61.19)           | 51.49<br>(49.95-53.03)         | 74.12<br>(73.67-74.56)         | 67.74<br>(67.20-68.28)           | 60.35<br>(59.26-61.43)         | 71.53<br>(70.33-72.74)         | 66.65<br>(65.46-67.85)           | 60.07<br>(58.51-61.63)         |
| DiEx                         | 63.95<br>(63.07-64.84)         | 56.52<br>(55.98-57.06)           | 50.18<br>(49.32-51.04)         | 54.44<br>(52.50-56.37)         | 50.59<br>(48.83-52.35)           | 45.40<br>(43.57-47.23)         | 62.48<br>(61.92-63.03)         | 55.86<br>(55.20-56.52)           | 50.13<br>(48.80-51.47)         | 57.97<br>(56.54-59.40)         | 55.31<br>(53.91-56.72)           | 52.85<br>(51.02-54.68)         |
| NLD                          | 76.79<br>(75.93-77.66)         | 76.59<br>(76.07-77.11)           | 70.75<br>(69.92-71.58)         | 68.78<br>(66.84-70.71)         | 70.09<br>(68.33-71.85)           | 64.26<br>(62.44-66.09)         | 87.94<br>(87.46-88.43)         | 81.82<br>(81.23-82.40)           | 71.54<br>(70.37-72.71)         | 83.17<br>(81.79-84.55)         | 78.57<br>(77.21-79.94)           | 69.61<br>(67.83-71.38)         |
| NLBS                         | 74.54<br>(73.54-75.54)         | 70.33<br>(69.73-70.93)           | 64.60<br>(63.63-65.58)         | 64.39<br>(62.08-66.69)         | 61.14<br>(59.05-63.23)           | 57.16<br>(54.98-59.33)         | 85.59<br>(84.98-86.20)         | 77.91<br>(77.18-78.64)           | 65.85<br>(64.37-67.33)         | 81.69<br>(79.96-83.43)         | 75.53<br>(73.81-77.25)           | 65.42<br>(63.19-67.65)         |
| SuO                          | 66.33<br>(65.31-67.35)         | 61.93<br>(61.32-62.54)           | 59.61<br>(58.63-60.59)         | 63.01<br>(60.74-65.28)         | 59.84<br>(57.79-61.88)           | 58.00<br>(55.86-60.14)         | 68.56<br>(67.83-69.29)         | 65.70<br>(64.89-66.51)           | 57.12<br>(55.49-58.74)         | 68.47<br>(66.77-70.16)         | 66.84<br>(65.20-68.48)           | 57.40<br>(55.25-59.56)         |
| SuDC                         | 79.87<br>(79.13-80.61)         | 79.34<br>(78.89-79.79)           | 74.41<br>(73.70-75.13)         | 77.71<br>(76.01-79.41)         | 77.27<br>(75.73-78.81)           | 73.04<br>(71.44-74.64)         | 80.06<br>(79.54-80.58)         | 76.49<br>(75.87-77.11)           | 70.89<br>(69.64-72.14)         | 77.76<br>(76.38-79.14)         | 75.23<br>(73.86-76.59)           | 72.46<br>(70.69-74.24)         |
| AcDC                         | 69.08<br>(68.32-69.84)         | 68.52<br>(68.06-68.98)           | 64.78<br>(64.05-65.51)         | 64.69<br>(62.96-66.42)         | 64.90<br>(63.33-66.47)           | 62.54<br>(60.91-64.17)         | 73.64<br>(73.12-74.16)         | 69.68<br>(69.06-70.30)           | 64.39<br>(63.14-65.64)         | 70.33<br>(68.92-71.75)         | 68.12<br>(66.72-69.52)           | 65.20<br>(63.37-67.02)         |

Svedbo Engström et al. A new diabetes questionnaire to add patients' perspectives to diabetes care for adults with type 1 and type 2 diabetes – A nationwide cross-sectional study of associations with generic health-related quality of life and clinical variables

| Diabetes Questionnaire scale | Type 1 diabetes                   |                                     |                                   |                                   |                                     |                                   | Type 2 diabetes                   |                                     |                                   |                                   |                                     |                                   |
|------------------------------|-----------------------------------|-------------------------------------|-----------------------------------|-----------------------------------|-------------------------------------|-----------------------------------|-----------------------------------|-------------------------------------|-----------------------------------|-----------------------------------|-------------------------------------|-----------------------------------|
|                              | Unadjusted analysis               |                                     |                                   | Adjusted analysis                 |                                     |                                   | Unadjusted analysis               |                                     |                                   | Adjusted analysis                 |                                     |                                   |
|                              | HbA <sub>1c</sub> <52<br>mmol/mol | HbA <sub>1c</sub> 52-69<br>mmol/mol | HbA <sub>1c</sub> ≥70<br>mmol/mol | HbA <sub>1c</sub> <52<br>mmol/mol | HbA <sub>1c</sub> 52-69<br>mmol/mol | HbA <sub>1c</sub> ≥70<br>mmol/mol | HbA <sub>1c</sub> <52<br>mmol/mol | HbA <sub>1c</sub> 52-69<br>mmol/mol | HbA <sub>1c</sub> ≥70<br>mmol/mol | HbA <sub>1c</sub> <52<br>mmol/mol | HbA <sub>1c</sub> 52-69<br>mmol/mol | HbA <sub>1c</sub> ≥70<br>mmol/mol |
| CoDC                         | 78.03<br>(77.13-78.92)            | 80.76<br>(80.22-81.29)              | 80.05<br>(79.20-80.90)            | 74.89<br>(72.88-76.90)            | 77.58<br>(75.75-79.41)              | 76.08<br>(74.18-77.97)            | 72.45<br>(71.77-73.12)            | 70.90<br>(70.11-71.70)              | 67.72<br>(66.11-69.33)            | 72.22<br>(70.34-74.09)            | 70.45<br>(68.59-72.31)              | 68.43<br>(66.01-70.84)            |
| MDMT                         | 77.14<br>(76.34-77.94)            | 75.78<br>(75.30-76.26)              | 72.81<br>(72.04-73.58)            | 72.21<br>(70.41-74.01)            | 71.74<br>(70.11-73.38)              | 70.14<br>(68.45-71.84)            | 82.46<br>(82.02-82.90)            | 78.80<br>(78.29-79.31)              | 76.45<br>(75.41-77.48)            | 81.42<br>(80.23-82.62)            | 78.79<br>(77.62-79.96)              | 76.64<br>(75.11-78.17)            |

**Table S7 continued.** GenW: General Wellbeing; MoE: Mood and Energy; FreW: Free of Worries about blood sugar; ManD: Capabilities to Manage your Diabetes; DiEx: Diet and Exercise; NLD: Not Limited by Diabetes; NLBS: Not Limited by Blood Sugar; SuO: Support from Others; SuDC: Support from Diabetes Care; AcDC: Access to Diabetes Care; CoDC: Continuity in Diabetes Care; MDMT: Medical Devices and Medical Treatment
